# Supplementary material
Source: PubMed Central journal article supplement (PMC2917108)

# **A palladium-catalysed enolate alkylation cascade for the formation of adjacent quaternary and tertiary stereocentres**

Jan Streuff, David E. White, Scott Virgil, and Brian M. Stoltz\*

*Division of Chemistry and Chemical Engineering and the Caltech Center for Catalysis and Chemical Synthesis,  
California Institute of Technology, Pasadena, California 91125*

## Supporting Information

|                                                                         |    |
|-------------------------------------------------------------------------|----|
| Materials and Methods .....                                             | 2  |
| Synthesis of Starting Materials.....                                    | 3  |
| Screening Experiments .....                                             | 8  |
| Conditions for the Determination of Enantiomeric Excess.....            | 9  |
| General Procedures .....                                                | 11 |
| Characterisation Data for New Products.....                             | 12 |
| References.....                                                         | 44 |
| <sup>1</sup> H and <sup>13</sup> C NMR Spectra of Products 3 and 4..... | 46 |
| HPLC and SFC Data for Products 3 and 4.....                             | 83 |

## Materials and Methods

All reactions have been carried out in flame-dried Schlenk-tubes under argon atmosphere using dry solvents unless noticed otherwise. *p*-Dioxane was freshly distilled over sodium prior to use. Other solvents were dried by passage through an activated alumina column under argon.  $[\text{Pd}_2(\text{dba})_3]$  and  $\text{Pd}(\text{pmdba})_2$  (pmdba = di(*p*-methoxybenzylidene)acetone) were synthesised from  $\text{PdCl}_2$  following a Literature procedure.<sup>1</sup>  $\text{PdCl}_2$  was purchased from Strem and used as received. Ligands **L1–4** were prepared by the method reported in our previous work.<sup>2</sup> All other chemicals were purchased from Aldrich and used as received. Reaction temperatures were controlled by an IKA Mag temperature modulator. Thin-layer chromatography (TLC) was performed using E. Merck silica gel 60 F254 precoated plates (0.25 mm) and visualised by UV fluorescence quenching or  $\text{KMnO}_4$  staining as described. ICN Silica gel (particle size 0.032–0.063 mm) was used for flash chromatography. Analytical chiral HPLC was performed with an Agilent 1100 Series HPLC utilizing a Chiralcel AD, OD-H or OJ columns (4.6 mm x 25 cm) obtained from Daicel Chemical Industries, Ltd with detection at  $\lambda = 210$  nm (if not noted otherwise). Analytical SFC was performed with a Mettler SFC supercritical  $\text{CO}_2$  analytical chromatography system with Chiralcel AD-H, OD-H, OJ-H, AS-H and OB-H columns. Optical rotations were measured with a Jasco P-2000 polarimeter at  $\lambda = 589$  nm.  $^1\text{H}$  and  $^{13}\text{C}$  NMR spectra were recorded on a Varian Inova 500 spectrometer (at 500 MHz and 125 MHz respectively) and a Varian Mercury 300 spectrometer (at 300 MHz and 75 MHz respectively) and reported to  $\text{CDCl}_3$  ( $\delta = 7.26$  ppm and  $\delta = 77.00$  ppm respectively). IR spectra were recorded on a Perkin Elmer Paragon 1000 spectrometer and are reported in frequency of absorption ( $\nu$ ). Melting points were determined using a Buechi B-545 capillary melting point apparatus and the values reported are uncorrected. High resolution mass analysis was performed on an Agilent 6200 Series Time-of-Flight LC/MS/TOF system or obtained from the Caltech Mass Spectral Facility.

## Synthesis of Starting Materials.

Compounds **1a-h** have been synthesised according to our previous procedure.<sup>3</sup> Starting materials **1e** and **1g** are new compounds. Compounds **2a-c** are literature-known but have been prepared by modified syntheses (see below).

### *(rac)*-Allyl 1-((*tert*-butyldimethylsilyloxy)methyl)-2-oxocyclohexanecarboxylate

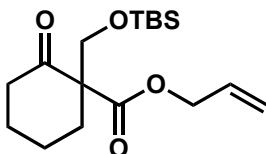

(±)-**1e**

Prepared following a reported procedure for the corresponding TBDPS protected alcohol.<sup>3</sup> Purified by flash chromatography (CH<sub>2</sub>Cl<sub>2</sub>) and isolated as the first fraction in 95% yield (colorless oil). <sup>1</sup>H NMR (500 MHz, CDCl<sub>3</sub>): δ = 0.00 (s, 6H), 0.82 (s, 9H), 1.51-1.67 (m, 2H), 1.75-1.80 (m, 2H), 1.98-2.01 (m, 1H), 2.35-2.37 (m, 2H), 2.61 (d, *J* = 13.5 Hz, 1H), 3.71 (d, *J* = 9.5, 1H), 4.06 (d, *J* = 9.5 Hz, 1H), 4.55-4.63 (m, 2H), 5.20 (d, *J* = 10.5 Hz, 1H), 5.29 (d, *J* = 17.5 Hz, 1H), 5.82-5.91 (m, 1H). <sup>13</sup>C NMR (125 MHz, CDCl<sub>3</sub>): δ = -5.7, 18.07, 22.05, 27.27, 33.46, 41.23, 62.85, 65.68, 65.87, 118.63, 131.57, 169.78, 206.75. HRMS (ESI/TOF) calcd for C<sub>17</sub>H<sub>31</sub>O<sub>4</sub>Si<sup>+</sup>: 327.1986, found: 327.2001. IR (NaCl): ν [cm<sup>-1</sup>] = 3087, 2952, 2931, 2884, 2858, 1715, 1650, 1472, 1464, 1453, 1388, 1361, 1252, 1200, 1149, 1105, 1053, 981, 938, 889, 837, 778, 747, 667.

### *(rac)*-Allyl 1-benzyl-3-methyl-4-oxopiperidine-3-carboxylate

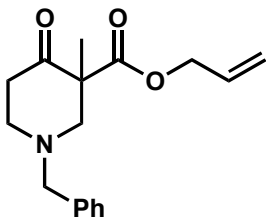

(±)-**1g**

Prepared by the following procedure. In a flame-dried 100 mL flask allyl 1-benzyl-4-oxopiperidine-3-carboxylate<sup>3</sup> (1.75 g, 6.4 mmol, 1.0 equiv) was added to a suspension of anhydrous K<sub>2</sub>CO<sub>3</sub> (3.54 g, 25.6 mmol, 4.0 equiv) in acetone (24 mL). Iodomethane (0.80

mL, 12.8 mmol, 2.0 equiv) was added and the resulting reaction mixture heated to 50°C for 10 h. The reaction was allowed to cool down to room temperature and TLC control showed the complete consumption of the starting material. The mixture was filtered and the residue washed with acetone several times. The filtrate was concentrated and the resulting oil purified by flash chromatography (hexanes/EtOAc 10:1,  $R_f$  = 0.6 in hexanes/EtOAc 5:1). 9.8% yield (180.3 mg, 0.63 mmol, colorless oil).  $^1\text{H}$  NMR (500 MHz,  $\text{CDCl}_3$ ):  $\delta$  = 1.25 (s, 3H), 2.17 (d,  $J$  = 12.0 Hz, 1H), 2.37-2.43 (m, 2H), 2.91 (ddd,  $J$  = 6.5, 12.5, 15.0 Hz, 1H), 3.05 (tdd,  $J$  = 2.5, 7.0, 11.5 Hz, 1H), 3.48 (dd,  $J$  = 2.5, 11.5 Hz, 1H), 3.59 (s, 2H), 4.60 (tdd,  $J$  = 1.5, 6.0, 13.5 Hz, 1H), 4.69 (tdd,  $J$  = 1.5, 6.0, 13.5 Hz, 1H), 5.24 (ddd,  $J$  = 1.0, 2.5, 10.5 Hz, 1H), 5.32 (ddd,  $J$  = 1.5, 3.0, 17.0 Hz, 1H), 5.88 (tdd,  $J$  = 6.0, 10.5, 17.0 Hz, 1H), 7.25-7.34 (m, 5H).  $^{13}\text{C}$  NMR (125 MHz,  $\text{CDCl}_3$ ):  $\delta$  = 17.76, 40.17, 53.48, 57.37, 61.74, 62.67, 65.78, 118.52, 127.28, 131.60, 137.80, 172.29, 206.19. HRMS (ESI/TOF) calcd for  $\text{C}_{17}\text{H}_{22}\text{NO}_3^+$ : 288.1594, found: 288.1604. IR (NaCl):  $\nu$  [ $\text{cm}^{-1}$ ] = 3028, 2936, 2806, 1719, 1495, 1453, 1347, 1314, 1230, 1194, 1129, 1071, 999, 932, 742, 699.

#### Benzylidenemalononitrile<sup>4</sup>

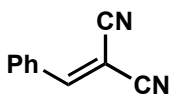

**2a**

This compound is commercially available (CAS 2700-22-3). A 250 mL round-bottom flask is charged with  $\text{Na}_2\text{SO}_4$  (50 g) under air. Dichloromethane (150 mL) is added followed by malononitrile (1.98 g, 30 mmol, 1.0 equiv) and benzaldehyde (3.35 mL, 33 mmol, 1.1 equiv). Piperidine (0.3 mL, 3 mmol, 0.1 equiv) is added and the mixture is stirred for 18 h in the capped flask. The solids are filtered off and rinsed with additional dichloromethane. The combined solutions are concentrated in vacuo and the crude mixture is submitted to column chromatography ( $\text{CH}_2\text{Cl}_2$ ). The first fraction contains product and a small amount of benzaldehyde. Concentration yields a brown-white powder which is washed with hexanes (4x10mL) to remove the remaining benzaldehyde. 85% yield.

### 3-Methoxybenzylidenemalononitrile<sup>4</sup>

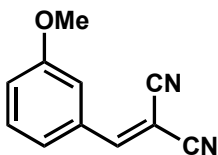

**2b**

This compound has been reported previously and was prepared following the procedure for benzylidenemalononitrile using *m*-anisaldehyde (4.0 mL, 31 mmol). The crude mixture was filtrated, the mother liquor concentrated and the product crystallised from dichloromethane. 62% yield (3.4 g, 18.5 mmol).

### 4-Methoxybenzylidenemalononitrile<sup>4</sup>

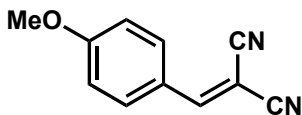

**2c**

This compound has been reported previously and is commercially available (CAS 2826-26-8). It was prepared following the procedure for **2a**.

### 4-Methylbenzylidenemalononitrile<sup>5</sup>

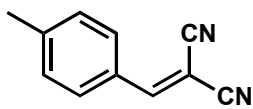

**2d**

This compound has been reported previously and is commercially available (CAS 2826-25-7). It was prepared following the procedure for **2a**.

### 4-(Dimethylamino)benzylidenemalononitrile<sup>5</sup>

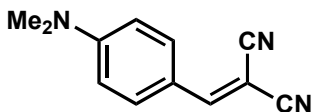

**2e**

This compound has been reported previously and is commercially available (CAS 2826-28-0). It was prepared following the procedure for **2a**.

### Furfurylidenemalononitrile<sup>4</sup>

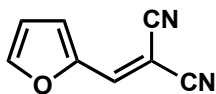

**2f**

This compound is commercially available (CAS 3237-22-7). Destillation of furfural is not necessary but recommended prior to use. A 250 mL round-bottom flask is charged with Na<sub>2</sub>SO<sub>4</sub> (50 g) under air. Dichloromethane (150 mL) is added followed by malononitrile (1.98 g, 30 mmol, 1.0 equiv) and furfural (2.8 mL, 33 mmol, 1.1 equiv). Piperidine (0.3 mL, 3 mmol, 0.1 equiv) is added and the mixture is stirred for 18 h in the capped flask. The reaction mixture is filtered and the solid residue thoroughly rinsed with dichloromethane and ethyl acetate. The intensely red colored organic solutions are combined and the solvent is evaporated under reduced pressure. The crude solid is washed with hot carbon tetrachloride (4-5 times) and the extract is concentrated to a volume of ~10 mL. Standing overnight at -20°C yields deep-orange crystals of pure **2d** (1.51 g, 10.5 mmol, 35%).

### 5-Benzodioxolymethylenemalononitrile<sup>5</sup>

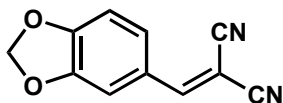

**2g**

This compound has been reported previously (CAS 2972-82-9). It was prepared following the procedure for **2a**.

### (*E*)-3-Phenylallylidenemalononitrile<sup>6</sup>

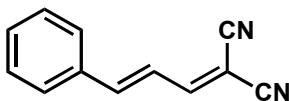

**2h**

This compound has been reported previously (CAS 41109-96-0). It was prepared following the procedure for **2a**.

**(E)-Methyl 2-cyano-3-phenylacrylate**<sup>7</sup>

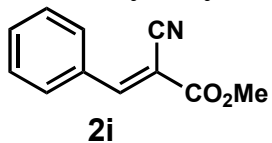

This compound has been reported previously and is commercially available (CAS 1214-54-6). It was prepared following the procedure for **2a**.

**5-Benzylidene-2,2-dimethyl-1,3-dioxane-4,6-dione**<sup>8</sup>

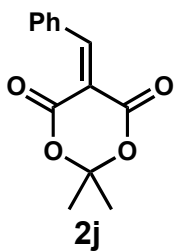

This compound has been reported previously (CAS 3695-84-9). It was prepared following the procedure for **2a**.

**Cyclohexylmethylenemalononitrile**<sup>9</sup>

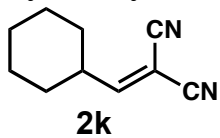

This compound has been reported previously (CAS 73776-46-2). It was prepared following the procedure for **2a**.

## Screening Experiments

**Optimisation of the Reaction Conditions.** During a short ligand screen it was found that electron withdrawing substituents in the ligand backbone significantly enhance the enantiomeric excess of both diastereomers (see Table S1). Careful adjustment of solvent and reaction temperature finally led to the conditions as described in the general procedure (see below). The screening experiments were carried out following that general procedure on a 0.1 mmol scale and selected results are shown here.

**Table S1.** Reaction Optimisation.

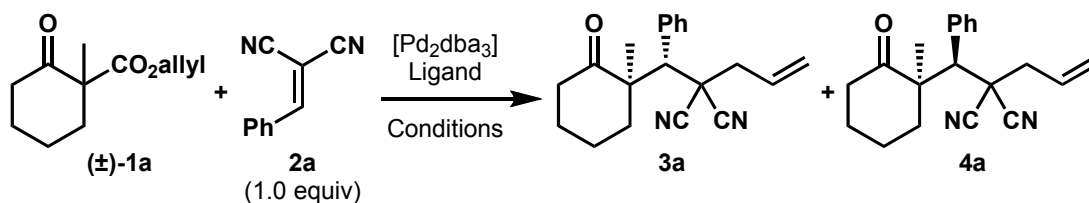

| entry          | ligand    | c            | T            | t           | conv <sup>b</sup> | d.r. (3a:4a)   | ee(3a) <sup>c</sup> | ee(4a) <sup>c</sup> |
|----------------|-----------|--------------|--------------|-------------|-------------------|----------------|---------------------|---------------------|
| 1              | L1        | 0.03 M       | 60 °C        | 15 h        | 82%               | 1 : 3.1        | 42%                 | 63%                 |
| 2              | L2        | 0.03 M       | 60 °C        | 15 h        | 87%               | 1 : 4.0        | 81%                 | 84%                 |
| 3 <sup>d</sup> | L2        | 0.03 M       | 60 °C        | 15 h        | 52%               | 1 : 3.4        | 66%                 | 75%                 |
| 4              | L2        | 0.03 M       | 40 °C        | 15 h        | 88%               | 1 : 4.1        | 71%                 | 83%                 |
| <b>5</b>       | <b>L2</b> | <b>0.1 M</b> | <b>40 °C</b> | <b>24 h</b> | <b>99%</b>        | <b>1 : 6.1</b> | <b>77%</b>          | <b>87%</b>          |
| 6              | L3        | 0.1 M        | 40 °C        | 15 h        | 15%               | 1 : 3.8        | nd                  | nd                  |
| 7              | L4        | 0.1 M        | 40 °C        | 15 h        | 27%               | 1 : 2.8        | nd                  | nd                  |

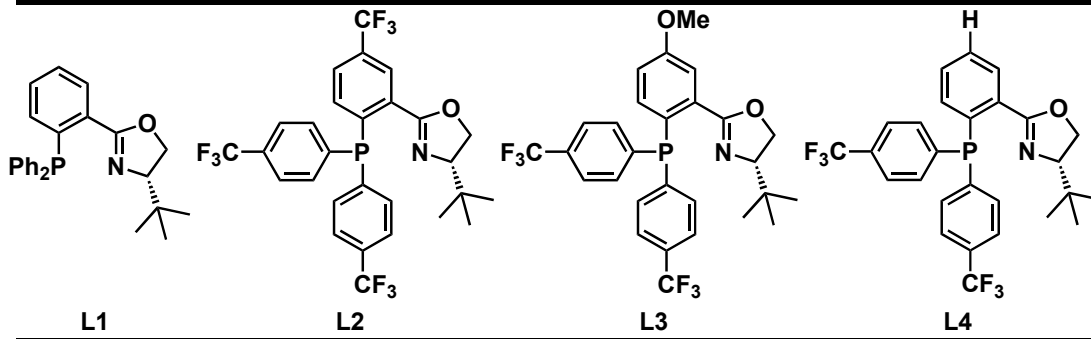

<sup>a</sup> Reactions carried out on a 0.1 mmol scale. <sup>b</sup> Conversion to product determined by crude NMR. <sup>c</sup> enantiomeric excess determined by chiral HPLC after filtration through a short silica column. <sup>d</sup> reaction carried out with 2.5 mol%  $[Pd_2dba_3]$  and 6.25 mol% **L2**.



## Conditions for the Determination of Enantiomeric Excess.

**Table S2.** Conditions for the Determination of Enantiomeric Excess.

| Entry | Compound                                                                            | Analysis Conditions                                                      | Retention times (min) |                  | ee <sup>a</sup> |
|-------|-------------------------------------------------------------------------------------|--------------------------------------------------------------------------|-----------------------|------------------|-----------------|
|       |                                                                                     |                                                                          | t <sub>1</sub>        | t <sub>2</sub>   |                 |
| 1     | 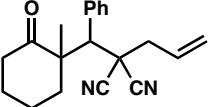   | HPLC, OD-H, 10% 2-propanol in hexane, 1 mL/min                           | 7.9                   | 8.4 <sup>b</sup> | 77%             |
| 2     |    | HPLC, OD-H, 10% 2-propanol in hexane, 1 mL/min                           | 9.7 <sup>b</sup>      | 12.1             | 87%             |
| 3     |    | HPLC, OD-H, 10% 2-propanol in hexane, 1 mL/min                           | 6.6 <sup>b</sup>      | 8.1              | 95%             |
| 4     |    | HPLC, OD-H, 10% 2-propanol in hexane, 1 mL/min                           | 8.0                   | 8.4 <sup>b</sup> | 99%             |
| 5     |    | HPLC, OJ, 4% EtOH in hexane, 1 mL/min                                    | 17.9 <sup>b</sup>     | 23.8             | 85%<br>(93%)    |
| 6     |    | HPLC, OJ, 4% EtOH in hexane, 1 mL/min                                    | 17.2 <sup>b</sup>     | 22.6             | 88%<br>(94%)    |
| 7     |   | HPLC, OD-H, 3% 2-propanol in hexane, 1 mL/min                            | 14.9 <sup>b</sup>     | 16.0             | 82%             |
| 8     |   | HPLC, OJ, 5% EtOH in hexane, 1 mL/min                                    | 24.6 <sup>b</sup>     | 29.9             | 89%             |
| 9     |  | SFC, AD-H, 10% 2-propanol in CO <sub>2</sub> ,<br>2 mL/min, 40°C, 100bar | 2.4 <sup>b</sup>      | 2.8              | 69%             |
| 10    |  | HPLC, AD, 3% 2-propanol in hexane, 1 mL/min                              | 6.0 <sup>b</sup>      | 6.3              | 70%             |
| 11    |  | HPLC, OD-H, 10% 2-propanol in hexane, 1 mL/min                           | 6.7                   | 7.2 <sup>b</sup> | 75%             |
| 12    |  | HPLC, OD-H, 10% 2-propanol in hexane, 1 mL/min                           | 8.1 <sup>b</sup>      | 10.6             | 81%             |
| 13    |  | SFC, AD-H, 20% 2-propanol in CO <sub>2</sub> ,<br>2 mL/min, 40°C, 100bar | 3.0                   | 3.7              | nd              |
| 14    |  | SFC, AD-H, 20% 2-propanol in CO <sub>2</sub> ,<br>2 mL/min, 40°C, 100bar | 3.0 <sup>b</sup>      | 3.7              | 89%             |
| 15    |  | SFC, OD-H, 10% 2-propanol in CO <sub>2</sub> ,<br>2 mL/min, 40°C, 100bar | 7.1 <sup>b</sup>      | 7.9              | 71%             |
| 16    |  | SFC, OD-H, 20% 2-propanol in CO <sub>2</sub> ,<br>2 mL/min, 40°C, 100bar | 4.4                   | 4.9 <sup>b</sup> | 97%             |

**Table S2 (continued).**

|    |                                                                                     |                                                                       |                  |                  |     |
|----|-------------------------------------------------------------------------------------|-----------------------------------------------------------------------|------------------|------------------|-----|
| 17 | 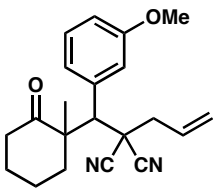   | HPLC, OD-H, 3% 2-propanol in hexane, 1 mL/min                         | 8.1 <sup>b</sup> | 8.5              | 71% |
| 18 |    | SFC, AD-H, 20% 2-propanol in CO <sub>2</sub> , 2 mL/min, 40°C, 100bar | 2.6 <sup>b</sup> | 3.0              | 86% |
| 19 |    | SFC, OJ-H, 10% 2-propanol in CO <sub>2</sub> , 2 mL/min, 40°C, 100bar | 3.3              | 3.8 <sup>b</sup> | 73% |
| 20 |    | SFC, AD-H, 10% 2-propanol in CO <sub>2</sub> , 2 mL/min, 40°C, 100bar | 6.5 <sup>b</sup> | 7.3              | 88% |
| 21 |    | SFC, OJ-H, 5% IPA, 2ml/min                                            | 3.7              | 4.1 <sup>b</sup> | 75% |
| 22 |    | SFC, AD-H, 10% IPA, 2ml/min                                           | 4.9 <sup>b</sup> | 5.8              | 87% |
| 23 |   | SFC, OJ-H, 10% IPA, 2ml/min                                           | 6.1 <sup>b</sup> | 10.1             | 78% |
| 24 |  | SFC, AD-H, 10% IPA, 2ml/min                                           | 7.8              | 8.9 <sup>b</sup> | 99% |
| 25 |  | HPLC, OD-H, 10% 2-propanol in hexane, 1 mL/min                        | 7.3 <sup>b</sup> | 8.0              | 65% |
| 26 |  | HPLC, AD, 10% 2-propanol in hexane, 1 mL/min                          | 8.9 <sup>b</sup> | 10.0             | 81% |
| 27 |  | HPLC, AD, 10% 2-propanol in hexane, 1 mL/min                          | 6.9 <sup>b</sup> | 8.6              | 89% |
| 28 |  | HPLC, OD-H, 10% 2-propanol in hexane, 1 mL/min                        | 7.9              | 8.5 <sup>b</sup> | 96% |
| 29 |  | SFC, AD-H, 20% IPA, 2ml/min                                           | 2.7 <sup>b</sup> | 3.1              | 58% |
| 30 |  | SFC, AD-H, 20% IPA, 2ml/min                                           | 3.1 <sup>b</sup> | 3.5              | 95% |

**Table S2 (continued).**

|    |                                                                                   |                             |                  |                   |     |
|----|-----------------------------------------------------------------------------------|-----------------------------|------------------|-------------------|-----|
| 31 | 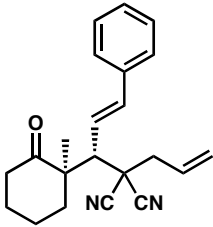 | SFC, 10% IPA, AD-H, 2ml/min | 4.5 <sup>b</sup> | 5.2               | 64% |
| 32 |  | SFC, OB-H, 10% IPA, 2ml/min | 4.6 <sup>b</sup> | 5.7               | 82% |
| 33 |  | SFC, OJ-H, 1% IPA, 2ml/min  | 9.8              | 13.7 <sup>b</sup> | 64% |
| 34 |  | SFC, OJ-H, 1% IPA, 2ml/min  | 16.4             | 19.1 <sup>b</sup> | 75% |
| 35 |  | SFC, AD-H, 20% IPA, 2ml/min | 2.5 <sup>b</sup> | 3.6               | 22% |
| 36 |  | SFC, AD-H, 10% IPA, 2ml/min | 7.6 <sup>b</sup> | 8.2               | 43% |

<sup>a</sup> Results shown in brackets were obtained from the reaction carried out at 23 °C. <sup>b</sup> major enantiomer.

## General Procedures

**General Procedure for Enantioselective Insertion–Allylation.** A flame-dried 50 mL Schlenk-tube is charged with [Pd<sub>2</sub>(dba)<sub>3</sub>] (13.7 mg, 0.015 mmol, 5 mol%) and **L2** (22.2 mg, 0.0375 mmol, 12.5 mol%) under argon atmosphere and 3 mL of freshly distilled *p*-dioxane are added. After stirring for 30 min at 23 °C, **1** (0.3 mmol, 1.0 equiv) and **2** (0.3 mmol, 1.0 equiv) are added simultaneously. The resulting yellow-green solution is stirred at the reported temperature for the reported amount of time (see Table 1). The consumption of starting material can be monitored by TLC (KMnO<sub>4</sub> stain) or by analysis of a small NMR sample. The solvent is removed under reduced pressure and the diastereomeric ratio determined by crude <sup>1</sup>H NMR. Isolation and separation of products **3** and **4** was achieved by flash chromatography in Hexanes/Ethyl Acetate mixtures (see compound description) in the given combined yields (Table 1, manuscript).

**General Procedure for the Synthesis of Racemic Products.** Racemic products were synthesised on a 0.3 mmol scale following the general procedure above and using dppe (1,2-bis(diphenylphosphino)ethane) as achiral ligand.

## Characterisation Data for New Products.

Please note that the absolute configuration was determined only for compounds **3b** and **4b** via X-ray analysis (vide infra). The absolute configuration for all other products **3** and **4** has been assumed based on this result.

*Isolated yields are reported in Table 1 (see manuscript). For respective HPLC or SFC conditions, please refer to Table S2.*

### 2-Allyl-2-((R)-((R)-1-methyl-2-oxocyclohexyl)(phenyl)methyl)malononitrile

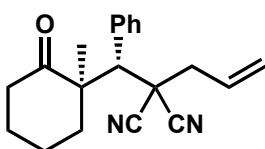

**3a**

Synthesised according to the general procedure. Purified by flash chromatography (hexanes/EtOAc 10:1 to 8:1 to 4:1, MnO<sub>4</sub> stain,  $R_f = 0.4$  in hexanes/EtOAc 6:1) and isolated as a colorless oil.  $[\alpha]_D^{25} = -44.17^\circ$  ( $c = 0.21$ , CH<sub>2</sub>Cl<sub>2</sub>, 77% ee). <sup>1</sup>H NMR (300 MHz, CDCl<sub>3</sub>):  $\delta = 0.80$  (s, 3H), 1.83 (dddd,  $J = 3.6, 8.7, 12.3, 16.2$  Hz, 1H), 1.99-2.07 (m, 3H), 2.38 (d,  $J = 13.2$  Hz, 1H), 2.47-2.64 (m, 5H), 4.33 (s, 1H), 5.30 (ddd,  $J = 1.2, 2.7, 17.1$  Hz, 1H), 5.41 (ddd,  $J = 1.2, 2.4, 10.2$  Hz, 1H), 5.90 (dddd,  $J = 6.6, 7.8, 10.2, 17.1$  Hz, 1H), 7.17 (d,  $J = 6.9$  Hz, 1H), 7.32-7.46 (m, 3H), 7.78 (d,  $J = 7.5$  Hz, 1H). <sup>13</sup>C NMR (75 MHz, CDCl<sub>3</sub>):  $\delta = 20.83, 24.11, 25.40, 32.91, 38.11, 39.49, 42.52, 52.04, 53.04, 115.69, 116.03, 123.07, 128.82, 128.91, 129.02, 133.69, 133.88, 212.55$ . HRMS (ESI/TOF) calcd for C<sub>20</sub>H<sub>23</sub>N<sub>2</sub>O<sup>+</sup>: 307.1805, found: 307.1802. IR (NaCl):  $\nu$  [cm<sup>-1</sup>] = 3084, 3032, 2945, 2872, 2244, 1702, 1493, 1454, 1417, 1229, 1129, 1088, 991, 936, 806, 771, 708.

### 2-Allyl-2-((S)-((R)-1-methyl-2-oxocyclohexyl)(phenyl)methyl)malononitrile

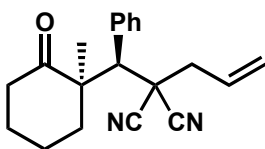

**4a**

Synthesised according to the general procedure. Purified by flash chromatography (hexanes/EtOAc 10:1 to 8:1 to 4:1, MnO<sub>4</sub> stain,  $R_f = 0.3$  in hexanes/EtOAc 6:1) and isolated as a colorless oil.  $[\alpha]_D^{25} = +38.33^\circ$  ( $c = 0.63$ , CH<sub>2</sub>Cl<sub>2</sub>, 87% ee). <sup>1</sup>H NMR (300 MHz, CDCl<sub>3</sub>):  $\delta = 1.33$  (ddd,  $J = 4.2, 11.4, 13.8$  Hz, 1H), 1.47 (dddd,  $J = 2.1, 3.9, 5.7, 13.8$  Hz, 1H), 1.58-1.77 (m, 3H), 1.79 (s, 3H), 1.95-2.03 (m, 1H), 2.47 (ddd,  $J = 3.9, 4.8, 13.2$  Hz, 1H), 2.53-2.62 (m, 2H), 2.76 (ddd,  $J = 6.0, 11.4, 13.2$  Hz, 1H), 3.95 (s, 1H), 5.29 (d,  $J = 17.1$  Hz, 1H), 5.40 (d,  $J = 10.2$  Hz, 1H), 5.93 (dddd,  $J = 6.6, 7.2, 10.2, 17.1$  Hz, 1H), 7.12 (br, 1H), 7.38 (br, 3H), 7.80 (br, 1H). <sup>13</sup>C NMR (75 MHz, CDCl<sub>3</sub>):  $\delta = 19.37, 20.86, 28.61, 38.32, 39.36, 40.85, 42.93, 52.59, 53.20, 115.71, 16.15, 123.16, 128.81, 128.82, 128.88, 128.94, 133.90, 214.15$ . HRMS (ESI/TOF) calcd for C<sub>20</sub>H<sub>23</sub>N<sub>2</sub>O<sup>+</sup>: 307.1805, found: 307.1793. IR (NaCl):  $\nu$  [cm<sup>-1</sup>] = 3084, 2944, 2868, 2245, 1703, 1494, 1454, 1385, 1307, 1262, 1227, 1112, 1088, 988, 935, 711.

### 2-Allyl-2-((R)-((R)-1-ethyl-2-oxocyclohexyl)(phenyl)methyl)malononitrile

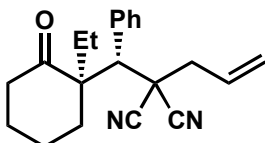

**3b**

Synthesised according to the general procedure. Purified by flash chromatography (hexanes/EtOAc 10:1 to 8:1 to 4:1, MnO<sub>4</sub> stain,  $R_f = 0.45$  in hexanes/EtOAc 6:1) and isolated as a colorless oil. Crystallised from 2-propanol as colorless crystals. mp = 123-124°C.  $[\alpha]_D^{25} = -86.18^\circ$  ( $c = 0.30$ , CH<sub>2</sub>Cl<sub>2</sub>, 95% ee). <sup>1</sup>H NMR (500 MHz, CDCl<sub>3</sub>):  $\delta = 0.39$  (t,  $J = 7.5$  Hz, 3H), 1.11 (qd = 7.5, 15.0 Hz, 1H), 1.86 (qd, = 7.5, 15.0 Hz, 1H), 1.94 (tt,  $J = 4.0, 13.0$  Hz, 1H), 1.98-2.05 (m, 2H), 2.08 (tt,  $J = 3.5, 13.0$  Hz, 1H), 2.35 (ddd,  $J = 7.0, 13.0, 16.0$  Hz, 1H), 2.45 (tdd,  $J = 2.5, 3.0, 13.0$  Hz, 1H), 2.56 (tdd,  $J = 1.0, 6.5, 14.0$  Hz, 1H), 2.57-2.65 (m, 2H), 2.66 (dd,  $J = 8.0, 14.0$  Hz, 1H), 4.33 (s, 1H), 5.31 (ddd,

$J = 1.0, 2.5, 17.0$  Hz, 1H), 5.40 (ddd,  $J = 1.0, 1.5, 11.0$  Hz, 1H), 5.92 (dddd,  $J = 7.0, 8.0, 11.0, 17.0$  Hz, 1H), 7.19 (d,  $J = 7.0$  Hz, 1H), 7.34 (t,  $J = 7.0$  Hz, 1H), 7.39 (td,  $J = 1.0, 7.5$  Hz, 1H), 7.44 (t,  $J = 7.0$  Hz, 1H), 7.76 (d,  $J = 7.5$  Hz, 1H).  $^{13}\text{C}$  NMR (125 MHz,  $\text{CDCl}_3$ ):  $\delta = 7.60, 21.14, 24.29, 27.94, 33.16, 39.35, 39.99, 42.51, 50.77, 55.72, 115.83, 116.07, 122.89, 128.49, 128.81, 128.94, 129.00, 129.46, 133.45, 133.72, 211.02$ . HRMS (ESI/TOF) calcd for  $\text{C}_{21}\text{H}_{25}\text{N}_2\text{O}^+$ : 321.1961, found: 321.1957. IR (NaCl):  $\nu$  [ $\text{cm}^{-1}$ ] = 3086, 3062, 3030, 2946, 2875, 2244, 1698, 1644, 1602, 1582, 1493, 1454, 1418, 1388, 1317, 1268, 1224, 1127, 1090, 1032, 991, 935, 802, 747, 710.

### Determination of the Absolute Configuration of 3b

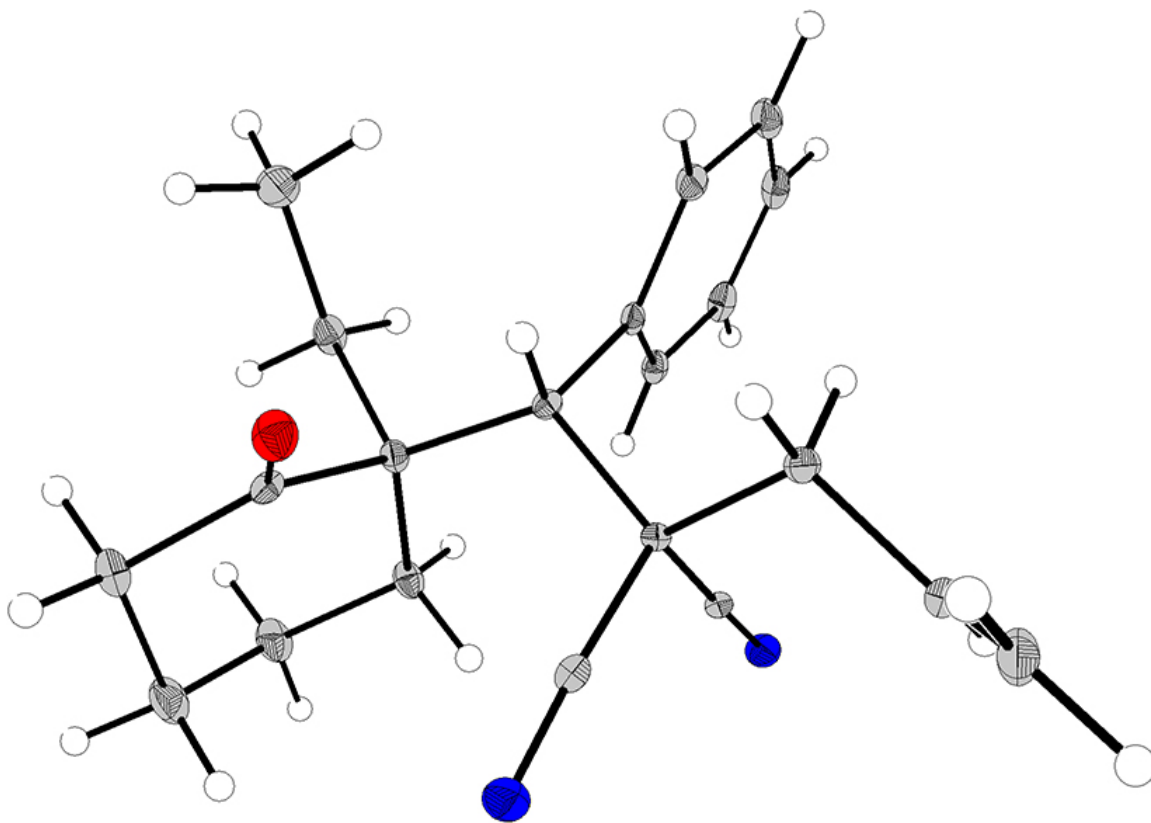

**Figure S1.** Crystal Structure of compound **3b**.<sup>10</sup>

**Table S3. Crystal data and structure refinement for JST01 (CCDC 732239).**

|                         |                                                  |
|-------------------------|--------------------------------------------------|
| Empirical formula       | C <sub>21</sub> H <sub>24</sub> N <sub>2</sub> O |
| Formula weight          | 320.42                                           |
| Crystallisation Solvent | 2-propanol                                       |
| Crystal Habit           | Prism                                            |
| Crystal size            | 0.35 x 0.18 x 0.16 mm <sup>3</sup>               |
| Crystal color           | Colorless                                        |

### Data Collection

|                                                                    |                                                                        |
|--------------------------------------------------------------------|------------------------------------------------------------------------|
| Type of diffractometer                                             | Bruker SMART 1000                                                      |
| Wavelength                                                         | 1.54178 Å CuK $\alpha$                                                 |
| Data Collection Temperature                                        | 100(2) K                                                               |
| $\theta$ range for 95430 reflections used in lattice determination | 34.76 to 69.78°                                                        |
| Unit cell dimensions                                               | a = 10.2994(3) Å<br>b = 12.6537(4) Å<br>c = 13.9603(4) Å               |
| Volume                                                             | 1819.38(9) Å <sup>3</sup>                                              |
| Z                                                                  | 4                                                                      |
| Crystal system                                                     | Orthorhombic                                                           |
| Space group                                                        | P2 <sub>1</sub> 2 <sub>1</sub> 2 <sub>1</sub>                          |
| Density (calculated)                                               | 1.170 Mg/m <sup>3</sup>                                                |
| F(000)                                                             | 688                                                                    |
| Data collection program                                            | Bruker SMART v5.630                                                    |
| $\theta$ range for data collection                                 | 4.72 to 69.77°                                                         |
| Completeness to $\theta = 69.77^\circ$                             | 98.9 %                                                                 |
| Index ranges                                                       | -10 $\leq$ h $\leq$ 12, -15 $\leq$ k $\leq$ 15, -16 $\leq$ l $\leq$ 16 |
| Data collection scan type                                          | $\omega$ scans at 17 settings                                          |
| Data reduction program                                             | Bruker SAINT v6.45A                                                    |
| Reflections collected                                              | 27441                                                                  |
| Independent reflections                                            | 3390 [R <sub>int</sub> = 0.0833]                                       |
| Absorption coefficient                                             | 0.561 mm <sup>-1</sup>                                                 |
| Absorption correction                                              | None                                                                   |
| Max. and min. transmission                                         | 0.9155 and 0.8277                                                      |

**Table S3 (cont.)****Structure solution and Refinement**

|                                             |                                             |
|---------------------------------------------|---------------------------------------------|
| Structure solution program                  | SHELXS-97 (Sheldrick, 2008)                 |
| Primary solution method                     | Direct methods                              |
| Secondary solution method                   | Difference Fourier map                      |
| Hydrogen placement                          | Difference Fourier map                      |
| Structure refinement program                | SHELXL-97 (Sheldrick, 2008)                 |
| Refinement method                           | Full matrix least-squares on F <sup>2</sup> |
| Data / restraints / parameters              | 3390 / 0 / 313                              |
| Treatment of hydrogen atoms                 | Unrestrained                                |
| Goodness-of-fit on F <sup>2</sup>           | 1.975                                       |
| Final R indices [I>2σ(I), 3232 reflections] | R1 = 0.0293, wR2 = 0.0643                   |
| R indices (all data)                        | R1 = 0.0311, wR2 = 0.0650                   |
| Type of weighting scheme used               | Sigma                                       |
| Weighting scheme used                       | w=1/σ <sup>2</sup> (Fo <sup>2</sup> )       |
| Max shift/error                             | 0.000                                       |
| Average shift/error                         | 0.000                                       |
| Absolute structure determination            | Anomalous differences                       |
| Absolute structure parameter                | -0.1(2)                                     |
| Largest diff. peak and hole                 | 0.150 and -0.183 e.Å <sup>-3</sup>          |

**Special Refinement Details**

Crystals were mounted on a glass fiber using Paratone oil then placed on the diffractometer under a nitrogen stream at 100K.

The absolute structure was determined from anomalous differences and confirmed by evaluating refinement of both conformations before choosing the final model. The chirality at C(7) is R.

Refinement of F<sup>2</sup> against ALL reflections. The weighted R-factor (wR) and goodness of fit (S) are based on F<sup>2</sup>, conventional R-factors (R) are based on F, with F set to zero for negative F<sup>2</sup>. The threshold expression of F<sup>2</sup> > 2σ(F<sup>2</sup>) is used only for calculating R-factors(gt) etc. and is not relevant to the choice of reflections for refinement. R-factors based on F<sup>2</sup> are statistically about twice as large as those based on F, and R-factors based on ALL data will be even larger.

All esds (except the esd in the dihedral angle between two l.s. planes) are estimated using the full covariance matrix. The cell esds are taken into account individually in the estimation of esds in distances, angles and torsion angles; correlations between esds in cell parameters are only used when they are defined by crystal symmetry. An approximate (isotropic) treatment of cell esds is used for estimating esds involving l.s. planes.



**2-Allyl-2-((S)-((R)-1-ethyl-2-oxocyclohexyl)(phenyl)methyl)malononitrile**

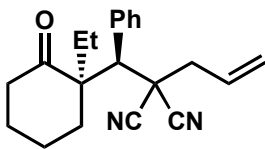

**4b**

Synthesised according to the general procedure. Purified by flash chromatography (hexanes/EtOAc 10:1 to 8:1 to 4:1, MnO<sub>4</sub> stain,  $R_f = 0.35$  in hexanes/EtOAc 6:1) and isolated as a colorless oil. Crystallised from 2-propanol as colorless crystals.  $[\alpha]_D^{25} = -42.71$  ( $c = 0.22$ , CH<sub>2</sub>Cl<sub>2</sub>, 99% ee). mp = 95-96°C. <sup>1</sup>H NMR (500 MHz, CDCl<sub>3</sub>):  $\delta = 0.80$  (t,  $J = 7.0$  Hz, 3H), 1.67-1.86 (m, 4H), 1.82 (ddd,  $J = 7.5, 7.5, 15.0$  Hz, 1H), 2.10 (tdd,  $J = 2.0, 3.5, 14.5$  Hz, 1H), 2.23 (dt,  $J = 5.0, 9.0$  Hz, 1H), 2.27 (ddd,  $J = 7.5, 7.5, 15.0$  Hz, 1H), 2.35-2.48 (m, 3H), 2.56 (tdd,  $J = 1.0, 6.5, 14.0$  Hz, 1H), 3.51 (s, 1H), 5.26 (ddd,  $J = 1.0, 2.5, 17.0$  Hz, 1H), 5.39 (ddd,  $J = 1.0, 2.0, 10.0$  Hz, 1H), 5.87 (dddd,  $J = 6.5, 8.0, 10.0, 17.0$  Hz, 1H), 7.17 (br, 1H), 7.35 (s, 3H), 7.86 (br, 1H). <sup>13</sup>C NMR (125 MHz, CDCl<sub>3</sub>):  $\delta = 8.62, 21.10, 24.71, 26.88, 33.28, 38.37, 39.55, 43.80, 54.21, 56.37, 115.99, 116.00, 123.50, 128.45, 128.47, 128.48, 128.51, 128.57, 128.67, 134.33, 212.65$ . HRMS (ESI/TOF) calcd for C<sub>21</sub>H<sub>28</sub>N<sub>3</sub>O<sup>+</sup>: 338.2227, found: 338.2211. IR (NaCl):  $\nu$  [cm<sup>-1</sup>] = 3066, 2947, 2874, 2244, 1699, 1492, 1456, 1419, 1385, 1316, 1126, 1088, 991, 936, 763, 710.

## Determination of the Absolute Configuration of 4b

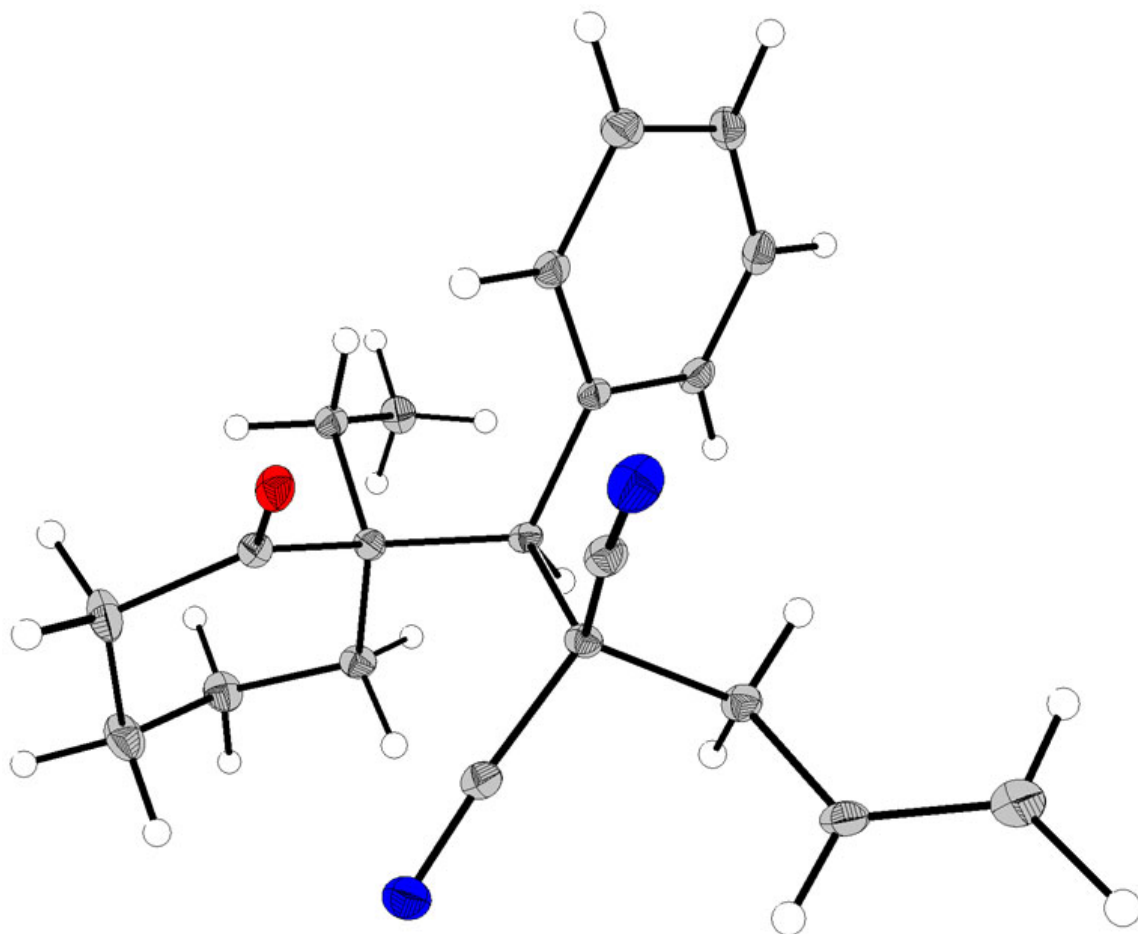

*Figure S2.* Crystal Structure of Compound **4b**.<sup>11</sup>

**Table S4. Crystal data and structure refinement for JST02 (CCDC 732240).**

|                         |                                                  |
|-------------------------|--------------------------------------------------|
| Empirical formula       | C <sub>21</sub> H <sub>24</sub> N <sub>2</sub> O |
| Formula weight          | 320.42                                           |
| Crystallisation Solvent | 2-propanol                                       |
| Crystal Habit           | Plate                                            |
| Crystal size            | 0.28 x 0.28 x 0.08 mm <sup>3</sup>               |
| Crystal color           | Colorless                                        |

### Data Collection

|                                                                   |                                                                      |
|-------------------------------------------------------------------|----------------------------------------------------------------------|
| Type of diffractometer                                            | Bruker SMART 1000                                                    |
| Wavelength                                                        | 1.54178 Å CuK $\alpha$                                               |
| Data Collection Temperature                                       | 100(2) K                                                             |
| $\theta$ range for 8004 reflections used in lattice determination | 34.91 to 69.31°                                                      |
| Unit cell dimensions                                              | a = 6.7294(2) Å<br>b = 15.7191(5) Å<br>c = 17.4651(6) Å              |
| Volume                                                            | 1827.29(10) Å <sup>3</sup>                                           |
| Z                                                                 | 4                                                                    |
| Crystal system                                                    | Monoclinic                                                           |
| Space group                                                       | P2 <sub>1</sub>                                                      |
| Density (calculated)                                              | 1.165 Mg/m <sup>3</sup>                                              |
| F(000)                                                            | 688                                                                  |
| Data collection program                                           | Bruker SMART v5.630                                                  |
| $\theta$ range for data collection                                | 2.56 to 69.40°                                                       |
| Completeness to $\theta = 69.40^\circ$                            | 97.7 %                                                               |
| Index ranges                                                      | -6 $\leq$ h $\leq$ 7, -19 $\leq$ k $\leq$ 18, -21 $\leq$ l $\leq$ 21 |
| Data collection scan type                                         | $\omega$ scans at 17 settings                                        |
| Data reduction program                                            | Bruker SAINT v6.45A                                                  |
| Reflections collected                                             | 27012                                                                |
| Independent reflections                                           | 6608 [R <sub>int</sub> = 0.0824]                                     |
| Absorption coefficient                                            | 0.559 mm <sup>-1</sup>                                               |
| Absorption correction                                             | None                                                                 |
| Max. and min. transmission                                        | 0.9566 and 0.8592                                                    |

**Table S4 (cont.)****Structure solution and Refinement**

|                                                        |                                    |
|--------------------------------------------------------|------------------------------------|
| Structure solution program                             | SHELXS-97 (Sheldrick, 2008)        |
| Primary solution method                                | Direct methods                     |
| Secondary solution method                              | Difference Fourier map             |
| Hydrogen placement                                     | Difference Fourier map             |
| Structure refinement program                           | SHELXL-97 (Sheldrick, 2008)        |
| Refinement method                                      | Full matrix least-squares on $F^2$ |
| Data / restraints / parameters                         | 6608 / 1 / 625                     |
| Treatment of hydrogen atoms                            | Unrestrained                       |
| Goodness-of-fit on $F^2$                               | 1.512                              |
| Final R indices [ $I > 2\sigma(I)$ , 6151 reflections] | $R1 = 0.0355$ , $wR2 = 0.0684$     |
| R indices (all data)                                   | $R1 = 0.0388$ , $wR2 = 0.0694$     |
| Type of weighting scheme used                          | Sigma                              |
| Weighting scheme used                                  | $w = 1/\sigma^2(F_o^2)$            |
| Max shift/error                                        | 0.001                              |
| Average shift/error                                    | 0.000                              |
| Absolute structure determination                       | Anomalous differences              |
| Absolute structure parameter                           | 0.14(17)                           |
| Largest diff. peak and hole                            | 0.161 and -0.189 e.Å <sup>-3</sup> |

**Special Refinement Details**

Crystals were mounted on a glass fiber using Paratone oil then placed on the diffractometer under a nitrogen stream at 100K.

The absolute structure was determined from anomalous differences and confirmed by evaluating refinement of both conformations before choosing the final model. The chirality at C(7) in both molecules is S.

Refinement of  $F^2$  against ALL reflections. The weighted R-factor ( $wR$ ) and goodness of fit ( $S$ ) are based on  $F^2$ , conventional R-factors ( $R$ ) are based on  $F$ , with  $F$  set to zero for negative  $F^2$ . The threshold expression of  $F^2 > 2\sigma(F^2)$  is used only for calculating R-factors(gt) etc. and is not relevant to the choice of reflections for refinement. R-factors based on  $F^2$  are statistically about twice as large as those based on  $F$ , and R-factors based on ALL data will be even larger.

All esds (except the esd in the dihedral angle between two l.s. planes) are estimated using the full covariance matrix. The cell esds are taken into account individually in the estimation of esds in distances, angles and torsion angles; correlations between esds in cell parameters are only used when they are defined by crystal symmetry. An approximate (isotropic) treatment of cell esds is used for estimating esds involving l.s. planes.

### 2-Allyl-2-((R)-((S)-1-benzyl-2-oxocyclohexyl)(phenyl)methyl)malononitrile

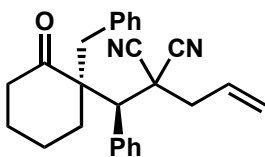

**3c**

Synthesised according to the general procedure. Purified by flash chromatography (hexanes/EtOAc 12:1 to 4:1, MnO<sub>4</sub> stain,  $R_f = 0.40$  in hexanes/EtOAc 12:1) and isolated as a colorless oil that solidifies on standing.  $[\alpha]_D^{25} = -51.18$  ( $c = 0.18$ , CH<sub>2</sub>Cl<sub>2</sub>, 85% ee). <sup>1</sup>H NMR (300 MHz, CDCl<sub>3</sub>):  $\delta = 1.64$  (td,  $J = 3.9, 13.5$  Hz, 1H), 1.81-2.25 (m, 4H), 2.49-2.83 (m, 7H), 4.20 (s, 1H), 5.28 (d,  $J = 17.1$  Hz, 1H), 5.39 (d,  $J = 10.2$  Hz, 1H), 5.87 (dddd,  $J = 6.9, 7.5, 10.2, 17.1$  Hz, 1H), 6.61 (dd,  $J = 2.1, 8.1$  Hz, 2H), 6.94 (d,  $J = 7.8$  Hz, 1H), 7.07-7.20 (m, 3H), 7.27 (dt,  $J = 1.2, 7.8$  Hz, 1H), 7.42 (tt,  $J = 1.2, 7.5$ , 1H), 7.49 (dt,  $J = 1.5, 7.5$  Hz, 1H), 7.85 (d,  $J = 8.1$  Hz, 1H). <sup>13</sup>C NMR (125 MHz, CDCl<sub>3</sub>):  $\delta = 21.69, 23.78, 33.05, 39.94, 41.38, 42.63, 46.00, 54.13, 56.61, 115.41, 115.96, 123.10, 126.95, 127.96, 128.46, 128.77, 128.99, 129.06, 129.11, 130.21, 133.58, 134.59, 135.88, 212.96$ . HRMS (ESI/TOF) calcd for C<sub>26</sub>H<sub>27</sub>N<sub>2</sub>O<sup>+</sup>: 383.2118, found: 383.2102. IR (NaCl):  $\nu$  [cm<sup>-1</sup>] = 3087, 3062, 3030, 2947, 2875, 2244, 1697, 1602, 1497, 1454, 1418, 1320, 1267, 1206, 1194, 1128, 1081, 1031, 988, 935, 799, 768, 746, 704.

### 2-Allyl-2-((S)-((S)-1-benzyl-2-oxocyclohexyl)(phenyl)methyl)malononitrile

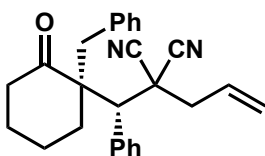

**4c**

Synthesised according to the general procedure. Purified by flash chromatography (hexanes/EtOAc 12:1 to 4:1, MnO<sub>4</sub> stain,  $R_f = 0.25$  in hexanes/EtOAc 12:1) and isolated as a colorless oil that solidifies on standing.  $[\alpha]_D^{25} = +24.70$  ( $c = 0.81$ , CH<sub>2</sub>Cl<sub>2</sub>, 88% ee). <sup>1</sup>H NMR (300 MHz, CDCl<sub>3</sub>):  $\delta = 1.11$ -1.58 (m, 4H), 1.97 (ddd,  $J = 4.8, 8.7, 14.4$  Hz, 1H), 2.07-2.34 (m, 3H), 2.46 (dd,  $J = 7.8, 13.8$  Hz, 1H), 2.58 (dd,  $J = 6.9, 13.8$  Hz, 1H), 3.09 (d,  $J = 12.8$  Hz, 1H), 3.73 (s, 1H), 3.88 (d,  $J = 12.8$  Hz, 1H), 5.24 (d,  $J = 17.1$  Hz, 1H), 5.39 (d,  $J = 10.2$  Hz, 1H), 5.87 (dddd,  $J = 6.9, 7.8, 10.2, 17.1$  Hz, 1H), 7.03-7.09 (m, 3H),

7.16-7.25 (m, 3H), 7.32-7.42 (m, 2H), 7.48 (t,  $J = 7.2$  Hz, 1H), 7.92 (d,  $J = 7.8$  Hz, 1H).  $^{13}\text{C}$  NMR (75 MHz,  $\text{CDCl}_3$ ):  $\delta = 21.25, 23.46, 31.96, 37.76, 40.97, 41.84, 43.71, 55.38, 57.38, 115.76, 115.79, 123.76, 126.68, 128.10, 128.21, 128.51, 128.83, 128.88, 128.92, 131.28, 133.51, 133.97, 136.44, 213.18$ . HRMS (ESI/TOF) calcd for  $\text{C}_{26}\text{H}_{26}\text{N}_2\text{ONa}^+$ : 405.1937, found: 405.1947. IR (NaCl):  $\nu$  [ $\text{cm}^{-1}$ ] = 3086, 3062, 3029, 2945, 2872, 2245, 1702, 1602, 1495, 1455, 1265, 1125, 1086, 1032, 990, 935, 751, 736, 705.

**Ethyl 3-((*S*)-1-((*R*)-2,2-dicyano-1-phenylpent-4-enyl)-2-oxocyclohexyl)-propanoate**

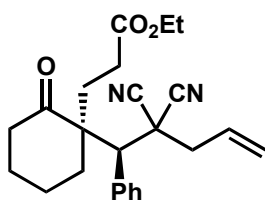

**3d**

Synthesised according to the general procedure. Purified by flash chromatography (hexanes/EtOAc 4:1 to 2:1,  $\text{MnO}_4$  stain,  $R_f = 0.20$  in hexanes/EtOAc 10:1) and isolated as a white solid. mp = 104°C.  $[\alpha]_D^{25} = -69.02$  (c = 0.15,  $\text{CH}_2\text{Cl}_2$ , 82% ee).  $^1\text{H}$  NMR (500 MHz,  $\text{CDCl}_3$ ):  $\delta = 1.13$  (t,  $J = 7.0$  Hz, 3H), 1.32 (ddd,  $J = 5.5, 10.0, 15.5$  Hz, 1H), 1.74 (ddd,  $J = 6.0, 10.5, 16.0$  Hz, 1H), 1.85 (ddd,  $J = 6.0, 10.5, 16.0$  Hz, 1H), 1.94-2.11 (m, 4H), 2.24 (ddd,  $J = 5.5, 10.0, 15.0$  Hz, 1H), 2.45-2.52 (m, 2H), 2.55 (tdd,  $J = 1.5, 6.5, 14.0$  Hz, 1H), 2.59-2.68 (m, 3H), 3.89-3.99 (m, 2H), 4.29 (s, 1H), 5.32 (ddd,  $J = 1.5, 2.5, 17.0$  Hz, 1H), 5.41 (d,  $J = 10.0$  Hz, 1H), 5.91 (dddd,  $J = 6.5, 7.5, 10.0, 17.0$  Hz, 1H), 7.19 (d,  $J = 1$  Hz), 7.35 (t,  $J = 6.5$  Hz, 1H), 7.41 (td,  $J = 1.0, 7.5$  Hz, 1H), 7.45 (t,  $J = 7.5$  Hz, 1H), 7.76 (d,  $J = 7.5$  Hz, 1H).  $^{13}\text{C}$  NMR (125 MHz,  $\text{CDCl}_3$ ):  $\delta = 14.04, 20.96, 24.11, 27.83, 29.65, 33.08, 39.24, 39.84, 42.47, 50.88, 54.68, 60.50, 115.61, 115.84, 123.09, 128.76, 128.81, 129.19, 129.27, 129.32, 132.86, 133.44, 172.26, 211.28$ . HRMS (ESI/TOF) calcd for  $\text{C}_{24}\text{H}_{28}\text{N}_2\text{O}_3\text{Na}^+$ : 415.1992, found: 415.1989. IR (NaCl):  $\nu$  [ $\text{cm}^{-1}$ ] = 3062, 2947, 2874, 2244, 1733, 1698, 1494, 1454, 1418, 1378, 1297, 1256, 1182, 1129, 1066, 1023, 990, 936, 802, 710.

**Ethyl 3-((S)-1-((S)-2,2-dicyano-1-phenylpent-4-enyl)-2-oxocyclohexyl)propanoate**

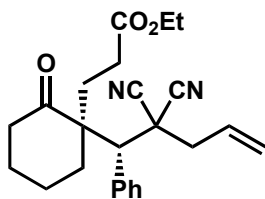

**4d**

Synthesised according to the general procedure. Purified by flash chromatography (hexanes/EtOAc 4:1 to 2:1, MnO<sub>4</sub> stain,  $R_f = 0.15$  in hexanes/EtOAc 10:1) and isolated as a colorless oil that solidifies on standing.  $[\alpha]_D^{25} = -33.99$  ( $c = 0.69$ , CH<sub>2</sub>Cl<sub>2</sub>, 89% ee). <sup>1</sup>H NMR (500 MHz, CDCl<sub>3</sub>):  $\delta = 1.20$  (t,  $J = 7.0$  Hz, 3H), 1.69-1.88 (m, 4H), 1.95 (dddd,  $J = 1.0, 3.5, 5.5, 16.0$  Hz, 1H), 2.05 (ddd,  $J = 5.5, 9.5, 15.0$  Hz, 1H), 2.15 (ddd,  $J = 6.0, 9.5, 15.0$  Hz, 1H), 2.18-2.23 (m, 1H), 2.36-2.61 (m, 6H), 3.48 (s, 1H), 4.06 (dq,  $J = 1.0, 7.0$  Hz, 2H), 5.27 (ddd,  $J = 1.0, 2.5, 17.0$  Hz, 1H), 5.40 (d,  $J = 10.0$  Hz, 1H), 5.86 (dddd,  $J = 6.5, 8.0, 10.0, 17.0$  Hz, 1H), 7.14 (br, 1H), 7.31-7.48 (br, m, 3H), 7.90 (br, 1H). <sup>13</sup>C NMR (125 MHz, CDCl<sub>3</sub>):  $\delta = 14.13, 20.84, 24.96, 28.13, 29.11, 34.04, 38.37, 39.52, 43.82, 54.16, 55.65, 60.62, 115.65, 115.71, 123.74, 128.49, 128.90, 133.63, 172.58, 212.27$ . HRMS (ESI/TOF) calcd for C<sub>24</sub>H<sub>28</sub>N<sub>2</sub>O<sub>3</sub>Na<sup>+</sup>: 415.1992, found: 415.1992. IR (NaCl):  $\nu$  [cm<sup>-1</sup>] = 3063, 2944, 2872, 2245, 1732, 1702, 1493, 1455, 1421, 1378, 1302, 1259, 1182, 1126, 1095, 1065, 1025, 992, 936, 857, 710.

**2-Allyl-2-((R)-((R)-1-((tert-butyldimethylsilyloxy)methyl)-2-oxocyclohexyl)(phenyl)methyl)malononitrile**

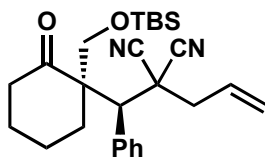

**3e**

Synthesised according to the general procedure using Pd(pmdba)<sub>2</sub> as precatalyst. Purified by flash chromatography (hexanes/EtOAc 15:1, MnO<sub>4</sub> stain,  $R_f = 0.5$ ) and isolated as a colorless oil.  $[\alpha]_D^{25} = -68.11^\circ$  ( $c = 0.63$ , CH<sub>2</sub>Cl<sub>2</sub>, 69% ee). <sup>1</sup>H NMR (500 MHz, CDCl<sub>3</sub>):  $\delta = -0.32$  (s, 3H), -0.22 (s, 3H), 0.74 (s, 9H), 1.80-1.90 (m, 1H), 1.97-2.08 (m, 3H), 2.38-2.48 (m, 2H), 2.52-2.58 (m, 2H), 2.60-2.65 (m, 1H), 2.66 (dd,  $J = 8.0, 14.0$  Hz, 1H), 3.11

(d,  $J = 10.0$  Hz, 1H), 3.67 (d,  $J = 10.0$  Hz, 1H), 4.44 (s, 1H), 5.30 (ddd, 1.0, 2.5, 17.0 Hz, 1H), 5.39 (d,  $J = 10.5$  Hz, 1H), 5.91 (dddd,  $J = 6.5, 8.0, 10.5, 17.0$  Hz, 1H), 7.18 (d,  $J = 7.5$  Hz, 1H), 7.30 (t,  $J = 7.5$  Hz, 1H), 7.36 (tt,  $J = 1.5, 7.0$  Hz, 1H), 7.40 (t,  $J = 7.0$  Hz, 1H), 7.72 (d,  $J = 7.5$  Hz, 1H).  $^{13}\text{C}$  NMR (125 MHz,  $\text{CDCl}_3$ ):  $\delta = -6.20, -6.09, 18.01, 21.82, 24.28, 25.64, 29.98, 39.50, 39.55, 42.51, 50.33, 56.99, 66.47, 115.65, 116.21, 122.81, 128.37, 128.43, 128.76, 128.97, 129.01, 133.37, 134.42, 208.96$ . HRMS (ESI/TOF) calcd for  $\text{C}_{26}\text{H}_{37}\text{N}_2\text{O}_2\text{Si}^+$ : 437.2619, found: 437.2623. IR (NaCl):  $\nu$  [ $\text{cm}^{-1}$ ] = 3089, 3063, 3033, 2953, 2931, 2882, 2857, 2244, 1713, 1644, 1499, 1472, 1455, 1420, 1390, 1362, 1318, 1258, 1223, 1117, 1096, 989, 937, 902, 840, 779, 714.

**2-Allyl-2-((S)-((R)-1-((tert-butyldimethylsilyloxy)methyl)-2-oxocyclohexyl)(phenyl)methyl)malononitrile**

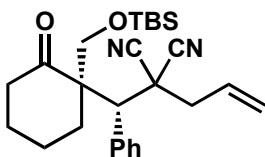

**4e**

Synthesised according to the general procedure using  $\text{Pd}(\text{pmdba})_2$  as precatalyst. Purified by flash chromatography (hexanes/EtOAc 15:1,  $\text{MnO}_4$  stain,  $R_f = 0.4$ ) and isolated as a colorless oil.  $[\alpha]_D^{25} = -25.49^\circ$  ( $c = 0.13, \text{CH}_2\text{Cl}_2, 70\%$  ee).  $^1\text{H}$  NMR (500 MHz,  $\text{CDCl}_3$ ):  $\delta = 0.01$  (s, 3H), 0.05 (s, 3H), 0.90 (s, 9H), 1.61-1.75 (m, 3H), 1.88-1.94 (m, 2H), 2.08 (dtd,  $J = 2.0, 4.0, 14.0$  Hz, 1H), 2.35 (dtd,  $J = 1.5, 4.0, 15.0$  Hz, 1H), 2.45-2.51 (m, 2H), 2.59 (tdd,  $J = 1.0, 6.5, 14.0$  Hz, 1H), 3.67 (s, 1H), 4.00 (d,  $J = 10.5$  Hz, 1H), 4.18 (d,  $J = 10.5$  Hz, 1H), 5.25 (ddd,  $J = 1.0, 2.5, 17.0$  Hz, 1H), 5.38 (d,  $J = 10.0$  Hz, 1H), 5.90 (dddd,  $J = 7.0, 8.0, 10.0, 17.0$  Hz, 1H), 7.04 (br, 1H), 7.23-7.44 (m, 3H), 7.91 (br, 1H).  $^{13}\text{C}$  NMR (125 MHz,  $\text{CDCl}_3$ ):  $\delta = -5.87, -5.77, 18.35, 21.29, 25.52, 25.89, 33.23, 38.93, 40.06, 40.83, 43.87, 53.93, 58.28, 64.33, 116.13, 123.12, 123.35, 128.43, 128.45, 128.52, 128.99, 129.73, 133.68, 134.31, 212.08$ . HRMS (ESI/TOF) calcd for  $\text{C}_{26}\text{H}_{37}\text{N}_2\text{O}_2\text{Si}^+$ : 437.2619, found: 437.2621. IR (NaCl):  $\nu$  [ $\text{cm}^{-1}$ ] = 3062, 3030, 2951, 2930, 2883, 2857, 2245, 1704, 1654, 1622, 1602, 1495, 1471, 1450, 1340, 1257, 1188, 1099, 990, 937, 839, 778, 700.



**2-((R)-((R)-1-Methyl-2-oxocyclohexyl)(phenyl)methyl)-2-(2-methylallyl)malononitrile**

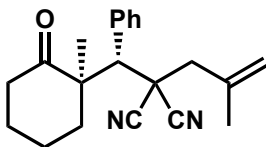

**3f**

Synthesised according to the general procedure. Purified by flash chromatography (hexanes/EtOAc 12:1 to 6:1, MnO<sub>4</sub> stain,  $R_f = 0.5$  in hexanes/EtOAc 6:1) and isolated as a white solid. Contains not separable benzylidenemalononitrile as impurity. mp = 67-68°C.  $[\alpha]_D^{25} = -29.40^\circ$  (c = 0.22, CH<sub>2</sub>Cl<sub>2</sub>, 75% ee). <sup>1</sup>H NMR (500 MHz, CDCl<sub>3</sub>): δ = 0.78 (s, 3H), 1.76 (m, 1H), 1.89 (s, 3H), 1.98-2.09 (m, 3H), 2.38 (ddd,  $J = 3.5, 5.0, 13.5$  Hz, 1H), 2.47 (d,  $J = 14.0$  Hz, 1H), 2.53 (ddd,  $J = 7.5, 11.0, 17.0$  Hz, 1H), 2.61 (d,  $J = 14.0$  Hz, 1H), 2.59-2.65 (m, 2H), 4.32 (s, 1H), 4.96 (s, 1H), 5.11 (quin,  $J = 1.5$  Hz, 1H), 7.17 (d,  $J = 7.0$  Hz, 1H), 7.34 (t,  $J = 7.5$  Hz, 1H), 7.39 (tt,  $J = 1.0, 7.5$  Hz, 1H), 7.43 (t,  $J = 7.5$  Hz, 1H), 7.81 (d,  $J = 7.5$  Hz, 1H). <sup>13</sup>C NMR (125 MHz, CDCl<sub>3</sub>): δ = 20.80, 23.07, 24.01, 25.52, 32.75, 38.10, 38.68, 46.17, 52.14, 54.24, 112.50, 113.66, 118.99, 128.57, 128.65, 128.86, 128.94, 130.91, 133.96, 137.27, 212.67. HRMS (ESI/TOF) calcd for C<sub>21</sub>H<sub>25</sub>N<sub>2</sub>O<sup>+</sup>: 321.1961 found: 322.1957. IR (NaCl): ν [cm<sup>-1</sup>] = 3033, 2947, 2872, 2230, 1699, 1594, 1570, 1494, 1450, 1379, 1319, 1300, 1219, 1188, 1129, 1092, 1000, 955, 913, 805, 761, 710, 686, 616.

**2-((S)-((R)-1-Methyl-2-oxocyclohexyl)(phenyl)methyl)-2-(2-methylallyl)malononitrile**

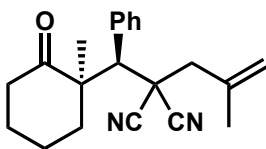

**4f**

Synthesised according to the general procedure. Purified by flash chromatography (hexanes/EtOAc 12:1 to 6:1, MnO<sub>4</sub> stain,  $R_f = 0.35$  in hexanes/EtOAc 6:1) and isolated as a white solid. mp = 144-146°C.  $[\alpha]_D^{25} = +67.50^\circ$  (c = 0.21, CH<sub>2</sub>Cl<sub>2</sub>, 81% ee). <sup>1</sup>H NMR (500 MHz, CDCl<sub>3</sub>): δ = 1.29 (ddd,  $J = 4.0, 11.5, 14.0$  Hz, 1H), 1.44 (dtd,  $J = 2.0, 4.0,$

13.5 Hz, 1H), 1.58 (ddd,  $J = 4.0, 8.5, 13.0$  Hz, 1H), 1.63-1.81 (m, 2H), 1.84 (s, 3H), 1.91 (s, 3H), 1.97-2.04 (m, 1H), 2.46 (d,  $J = 14.0$  Hz, 1H), 2.47 (dtd,  $J = 1.0, 4.5, 13.0$  Hz, 1H), 2.58 (d,  $J = 14.0$  Hz, 1H), 2.80 (ddd,  $J = 6.0, 11.5, 13.0$  Hz, 1H), 3.99 (s, 1H), 5.00 (s, 1H), 5.12 (quin, 1.5 Hz, 1H), 7.12 (br, 1H), 7.30-7.47 (br, 2H), 7.38 (t,  $J = 7.0$  Hz, 1H), 7.84 (br, 1H).  $^{13}\text{C}$  NMR (125 MHz,  $\text{CDCl}_3$ ):  $\delta = 19.15, 20.86, 23.19, 28.85, 38.26, 38.75, 41.17, 46.45, 52.77, 54.42, 116.24, 116.54, 119.05, 128.72, 128.74, 128.85, 134.08, 137.37, 214.35$ . HRMS (ESI/TOF) calcd for  $\text{C}_{21}\text{H}_{25}\text{N}_2\text{O}^+$ : 321.1961 found: 321.1958. IR (NaCl):  $\nu$  [ $\text{cm}^{-1}$ ] = 3062, 2946, 2868, 2245, 1704, 1646, 1494, 1454, 1384, 1307, 1260, 1229, 1092, 909, 781, 765, 738, 712.

**(rac, syn)-2-Allyl-2-(1-benzyl-3-methyl-4-oxopiperidin-3-yl)(phenyl)methyl-malononitrile**

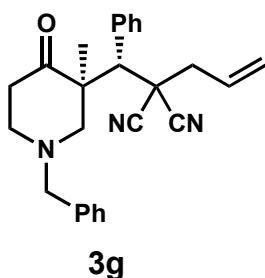

Synthesised according to the general procedure for racemic compounds. Purified by flash chromatography (hexanes/EtOAc 10:1 to 4:1,  $\text{MnO}_4$  stain,  $R_f = 0.3$  in hexanes/EtOAc 10:1) and isolated as a colorless oil that runs very close to **3f** on TLC.  $^1\text{H}$  NMR (500 MHz,  $\text{CDCl}_3$ ):  $\delta = 1.10$  (s, 3H), 2.46-2.54 (m, 3H), 2.60 (ddd,  $J = 8.0, 8.5, 16.0$  Hz, 1H), 2.86 (dd,  $J = 4.5, 8.5$  Hz, 2H), 3.01 (d,  $J = 12.0$  Hz, 1H), 3.47 (d,  $J = 12.0$  Hz, 1H), 3.71 (d,  $J = 13.0$  Hz, 1H), 3.76 (d,  $J = 13.0$  Hz, 1H), 4.30 (s, 1H), 5.30 (ddd,  $J = 1.0, 2.5, 17.0$  Hz, 1H), 5.42 (d,  $J = 10.0$  Hz, 1H), 5.88 (dddd,  $J = 7.0, 7.5, 10.0, 17.0$  Hz, 1H), 7.17 (d,  $J = 7.0$  Hz, 1H), 7.29 (tt,  $J = 1.5, 7.0$  Hz, 1H), 7.32-7.40 (m, 7H), 7.55 (br, 1H).  $^{13}\text{C}$  NMR (125 MHz,  $\text{CDCl}_3$ ):  $\delta = 24.00, 38.54, 39.10, 42.77, 51.69, 52.00, 53.09, 60.21, 62.36, 115.70, 115.72, 123.25, 127.41, 128.44, 128.58, 128.65, 128.68, 128.93, 129.05, 129.23, 133.32, 133.57, 138.05, 210.09$ . HRMS (ESI/TOF) calcd for  $\text{C}_{26}\text{H}_{28}\text{N}_3\text{O}^+$ : 398.2227, found: 398.2219. IR (NaCl):  $\nu$  [ $\text{cm}^{-1}$ ] = 3063, 3030, 2932, 2822, 2245, 1710, 1643, 1602, 1495, 1455, 1403, 1349, 1311, 1249, 1197, 1143, 1084, 1029, 991, 936, 739, 704.

**2-Allyl-2-((S)-((S)-1-benzyl-3-methyl-4-oxopiperidin-3-yl)(phenyl)methyl)malononitrile**

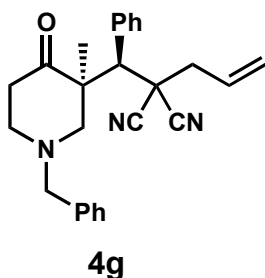

Synthesised according to the general procedure. Purified by flash chromatography (hexanes/EtOAc 10:1 to 4:1, MnO<sub>4</sub> stain,  $R_f = 0.25$  in hexanes/EtOAc 10:1) and isolated as a colorless oil. Runs very close to **3f** on TLC.  $[\alpha]_D^{25} = +161.51^\circ$  ( $c = 0.13$ , CH<sub>2</sub>Cl<sub>2</sub>, 89% ee). <sup>1</sup>H NMR (500 MHz, CDCl<sub>3</sub>):  $\delta = 1.55$  (s, 3H), 1.99 (d,  $J = 12.5$  Hz, 1H), 2.34 (dd,  $J = 2.0, 12.0$  Hz, 1H), 2.42 (dt,  $J = 6.0, 10.5$  Hz, 1H), 2.44 (d,  $J = 7.5$  Hz, 1H), 2.63-2.67 (m, 1H), 2.91-3.01 (m, 2H), 3.21 (d,  $J = 13.0$  Hz, 1H), 3.45 (d,  $J = 13.0$  Hz, 1H), 4.17 (s, 1H), 5.24 (ddd,  $J = 1.0, 2.5, 17.0$  Hz, 1H), 5.39 (d,  $J = 10.0$  Hz, 1H), 5.87 (tdd,  $J = 7.5, 10.0, 17.0$  Hz, 1H), 7.23-7.39 (m, 8H), 7.42 (t,  $J = 8.0$  Hz, 1H), 7.78 (d,  $J = 7.5$  Hz, 1H). <sup>13</sup>C NMR (125 MHz, CDCl<sub>3</sub>):  $\delta = 16.86, 38.47, 39.58, 43.42, 52.28, 53.75, 53.93, 61.59, 65.60, 114.95, 115.84, 123.52, 127.52, 127.88, 128.39, 128.47, 128.62, 128.99, 129.06, 129.11, 133.06, 133.41, 137.34, 211.53$ . HRMS (ESI/TOF) calcd for C<sub>26</sub>H<sub>28</sub>N<sub>3</sub>O<sup>+</sup>: 398.2227, found: 398.2226. IR (NaCl):  $\nu$  [cm<sup>-1</sup>] = 3086, 3062, 3030, 2981, 2950, 2808, 2246, 1711, 1643, 1602, 1587, 1495, 1456, 1384, 1348, 1247, 1194, 1118, 1070, 1029, 990, 936, 773, 737, 701, 620.

**2-Allyl-2-((R)-((S)-1-benzyl-3-ethyl-4-oxopiperidin-3-yl)(phenyl)methyl)malononitrile**

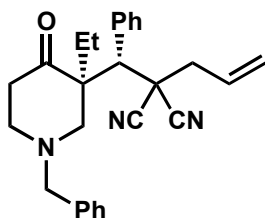

**3h**

Synthesised according to the general procedure. Purified by flash chromatography (hexanes/EtOAc 10:1, MnO<sub>4</sub> stain,  $R_f = 0.3$ ) and isolated as a colorless oil.  $[\alpha]_D^{25} = -36.90^\circ$  ( $c = 0.18$ , CH<sub>2</sub>Cl<sub>2</sub>, 71% ee). <sup>1</sup>H NMR (500 MHz, CDCl<sub>3</sub>):  $\delta = 0.45$  (t,  $J = 7.5$  Hz, 3H), 1.15 (qd,  $J = 7.5, 15.0$  Hz, 1H), 2.25 (qd,  $J = 7.5, 15.0$  Hz, 1H), 2.50-2.64 (m, 4H), 2.79 (dt,  $J = 5.0, 11.0$  Hz, 1H), 3.00-3.04 (m, 1H), 3.36 (d,  $J = 11.5$  Hz, 1H), 3.40 (dd,  $J = 2.0, 11.5$  Hz, 1H), 3.77 (s, 2H), 4.27 (s, 1H), 5.31 (d,  $J = 17.0$  Hz, 1H), 5.41 (d,  $J = 10.0$  Hz, 1H), 5.90 (dddd,  $J = 6.5, 7.5, 10.0, 17.0$  Hz, 1H), 7.19 (d,  $J = 7.0$  Hz, 1H), 7.29 (t,  $J = 7.5$  Hz, 1H), 7.32-7.40 (m, 7H), 7.52 (br, 1H). <sup>13</sup>C NMR (125 MHz, CDCl<sub>3</sub>):  $\delta = 7.78, 28.91, 39.26, 39.66, 42.71, 50.71, 50.76, 56.25, 58.90, 62.56, 115.84, 123.08, 127.34, 128.41, 128.57, 128.85, 128.90, 128.96, 128.99, 129.01, 133.07, 133.58, 138.09, 209.10$ . HRMS (ESI/TOF) calcd for C<sub>27</sub>H<sub>29</sub>CIN<sub>3</sub>O<sup>-</sup> [M+Cl]<sup>-</sup>: 446.2005, found: 446.2011. IR (NaCl):  $\nu$  [cm<sup>-1</sup>] = 3086, 3062, 3030, 2971, 2940, 2882, 2827, 2780, 2244, 1706, 1496, 1454, 1352, 1266, 1239, 1200, 1137, 1092, 1028, 990, 936, 809, 739, 709.

**2-Allyl-2-((S)-((S)-1-benzyl-3-ethyl-4-oxopiperidin-3-yl)(phenyl)methyl)malononitrile**

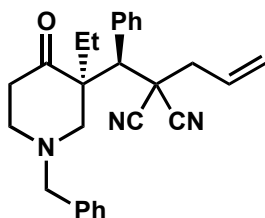

**4h**

Synthesised according to the general procedure. Purified by flash chromatography (hexanes/EtOAc 10:1, MnO<sub>4</sub> stain,  $R_f = 0.25$ ) and isolated as a colorless oil.  $[\alpha]_D^{25} =$

+51.73° (c = 0.598, CH<sub>2</sub>Cl<sub>2</sub>, 97% ee). <sup>1</sup>H NMR (500 MHz, CDCl<sub>3</sub>): δ = 0.81 (t, *J* = 7.5 Hz, 3H), 1.59 (td, *J* = 7.5, 15.0 Hz, 1H), 2.35 (dd, *J* = 7.5, 14.0 Hz, 1H), 2.40-2.46 (m, 2H), 2.51-2.70 (m, 4H), 2.85-2.96 (m, 2H), 3.39 (d, *J* = 13.0 Hz, 1H), 3.53 (d, *J* = 13.0 Hz, 1H), 3.91 (s, 1H), 5.20 (ddd, *J* = 1.0, 2.5, 17.0 Hz, 1H), 5.37 (d, *J* = 10.0 Hz, 1H), 5.83 (dddd, *J* = 7.0, 7.5, 10.0, 17.0 Hz, 1H), 7.02 (br, 1H), 7.21 (br, 1H), 7.32-7.40 (m, 7H), 7.80 (br, 1H). <sup>13</sup>C NMR (125 MHz, CDCl<sub>3</sub>): δ = 9.07, 23.93, 37.96, 40.23, 44.00, 52.34, 53.22, 56.80, 59.20, 62.22, 115.32, 115.82, 123.49, 127.53, 128.39, 128.50, 128.61, 128.70, 128.82, 129.24, 133.29, 133.61, 137.66, 210.43. HRMS (ESI/TOF) calcd for C<sub>27</sub>H<sub>29</sub>ClN<sub>3</sub>O<sup>-</sup> [M+Cl]<sup>-</sup>: 446.2005, found: 446.2026. IR (NaCl): ν [cm<sup>-1</sup>] = 3086, 3062, 3030, 2965, 2886, 2824, 2245, 1707, 1495, 1455, 1350, 1243, 1191, 1137, 1109, 1078, 1029, 990, 935, 738, 707.

**2-Allyl-2-((*R*)-(3-methoxyphenyl)((*R*)-1-methyl-2-oxocyclohexyl)methyl)malononitrile**

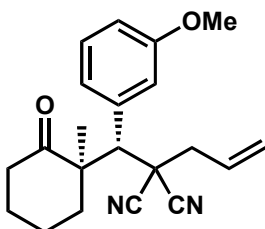

**3i**

Synthesised according to the general procedure. Purified by flash chromatography (hexanes/EtOAc 6:1, MnO<sub>4</sub> stain, *R<sub>f</sub>* = 0.40) and isolated as a colorless oil. The <sup>1</sup>H and <sup>13</sup>C NMR spectra show a 1:1 mixture of two rotamers. [α]<sub>D</sub><sup>25</sup> = -134.63° (c = 0.68, CH<sub>2</sub>Cl<sub>2</sub>, 71% ee). <sup>1</sup>H NMR (500 MHz, CDCl<sub>3</sub>): δ = 0.82 (s, 1.5H), 0.83 (s, 1.5H), 1.80-1.86 (m, 1H), 1.99-2.04 (m, 3H), 2.37 (d, *J* = 13.0 Hz, 1H), 2.49-2.64 (m, 5H), 3.81 (s, 1.5H), 3.23 (s, 1.5H), 4.25 (s, 0.5H), 4.32 (s, 0.5H), 5.31 (dd, *J* = 4.0, 17.0 Hz, 1H), 5.41 (d, *J* = 10.0 Hz, 1H), 5.91 (tdd, *J* = 7.5, 10.0, 17.0 Hz, 1H), 6.71 (s, 0.5H), 6.75 (d, *J* = 7.5 Hz, 0.5H), 6.90-6.93 (m, 1H), 7.24 (d, *J* = 8.0 Hz, 0.5H), 7.31 (s, 0.5H), 7.34 (d, *J* = 5.0 Hz, 1H). <sup>13</sup>C NMR (125 MHz, CDCl<sub>3</sub>): δ = 20.82, 24.08, 25.24, 32.82, 32.89, 38.09, 39.40, 42.52, 51.98, 52.02, 52.78, 53.17, 55.21, 55.27, 113.53, 114.17, 114.66, 115.65, 116.05, 116.24, 119.70, 120.75, 123.02, 125.86, 128.83, 128.87, 129.54, 130.11, 135.16,

135.32, 159.50, 159.85, 212.40, 212.52. HRMS (ESI/TOF) calcd for  $C_{21}H_{25}N_2O_2^+$   $[M+H]^+$ : 337.1911, found: 337.1918. IR (NaCl):  $\nu$  [ $cm^{-1}$ ] = 3084, 2945, 2872, 2838, 2229, 1702, 1600, 1583, 1494, 1456, 1436, 1322, 1296, 1264, 1227, 1166, 1128, 1049, 995, 936, 864, 729, 762, 729, 705, 684.

**2-Allyl-2-((S)-(3-methoxyphenyl)((R)-1-methyl-2-oxocyclohexyl)methyl)malononitrile**

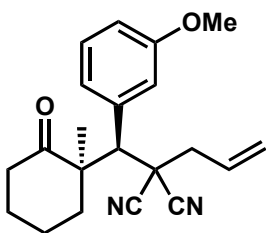

**4i**

Synthesised according to the general procedure. Purified by flash chromatography (hexanes/EtOAc 6:1,  $MnO_4$  stain,  $R_f = 0.35$ ) and isolated as a colorless oil. The  $^1H$  and  $^{13}C$  NMR spectra show a mixture of two rotamers.  $[\alpha]_D^{25} = +51.97^\circ$  ( $c = 0.55$ ,  $CH_2Cl_2$ , 86% ee).  $^1H$  NMR (500 MHz,  $CDCl_3$ ):  $\delta = 1.35$ -1.40 (br, 1H), 1.47 (dddd,  $J = 2.0, 4.0, 6.5, 14.0$  Hz, 1H), 1.58-1.65 (m, 1H), 1.69-1.76 (m, 1H), 1.77 (s, 3H), 1.96-2.01 (m, 1H), 2.47 (td,  $J = 4.5, 13.0$  Hz, 1H), 2.54 (dd,  $J = 7.0, 14.0$  Hz, 1H), 2.58 (dd,  $J = 8.0, 14.0$  Hz, 1H), 2.76 (ddd, 6.0, 11.0, 13.0 Hz, 1H), 3.81 (s, 3H), 3.90 (s, 1H), 5.30 (ddd,  $J = 1.0, 2.5, 17.0$  Hz, 1H), 5.40 (d,  $J = 10.0$  Hz, 1H), 5.93 (dddd,  $J = 6.5, 7.5, 10.0, 17.0$  Hz, 1H), 6.68 (br, 1H), 6.91 (d, 6.5 Hz, 1H), 7.23 (br, 1H), 7.36 (br, 1H).  $^{13}C$  NMR (125 MHz,  $CDCl_3$ ):  $\delta = 19.27, 20.86, 28.65, 38.31, 39.28, 40.82, 42.92, 52.55, 53.09, 55.22, 113.25, 114.22, 114.70, 115.63, 116.22, 119.73, 120.79, 123.09, 125.61, 128.85, 129.44, 129.96, 135.23, 159.41, 159.82, 214.08$ . HRMS (ESI/TOF) calcd for  $C_{21}H_{25}N_2O_2^+$   $[M+H]^+$ : 337.1911, found: 337.1918. IR (NaCl):  $\nu$  [ $cm^{-1}$ ] = 3085, 2943, 2868, 2838, 2249, 1704, 1600, 1583, 1494, 1454, 1437, 1384, 1323, 1290, 1268, 1225, 1170, 1050, 988, 936, 882, 792, 742, 704.

**2-Allyl-2-((R)-(4-methoxyphenyl)((R)-1-methyl-2-oxocyclohexyl)methyl)malononitrile**

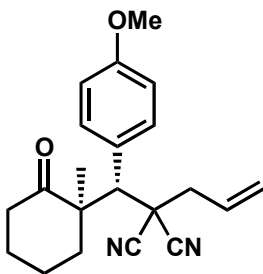

**3j**

Synthesised according to the general procedure. Purified by flash chromatography (hexanes/EtOAc 8:1 to 6:1 to 4:1, MnO<sub>4</sub> stain,  $R_f = 0.40$  in hexanes/EtOAc 6:1) and isolated as a colorless oil that solidifies on standing.  $[\alpha]_D^{25} = -47.87^\circ$  ( $c = 0.66$ , CH<sub>2</sub>Cl<sub>2</sub>, 73% ee). <sup>1</sup>H NMR (500 MHz, CDCl<sub>3</sub>):  $\delta = 0.80$  (s, 3H), 1.77-1.86 (m, 1H), 1.99-2.05 (m, 3H), 2.34 (d,  $J = 13.0$  Hz, 1H), 2.48-2.63 (m, 5H), 3.82 (s, 3H), 4.26 (s, 1H), 5.30 (ddd,  $J = 1.0, 2.5, 17.0$  Hz, 1H), 5.40 (d,  $J = 10.0$  Hz, 1H), 5.90 (dddd,  $J = 7.0, 7.5, 10.0, 17.0$  Hz, 1H), 6.84 (dd,  $J = 2.5, 8.5$  Hz, 1H), 6.95 (dd,  $J = 3.0, 8.5$  Hz, 1H), 7.08 (dd,  $J = 1.5, 8.5$  Hz, 1H), 7.68 (dd,  $J = 1.5, 8.5$  Hz, 1H). <sup>13</sup>C NMR (125 MHz, CDCl<sub>3</sub>):  $\delta = 20.82, 24.10, 25.40, 32.85, 38.12, 39.62, 42.48, 52.20, 52.39, 55.22, 113.85, 114.46, 115.76, 116.09, 112.91, 125.66, 128.09, 129.54, 134.88, 159.83, 212.66$ . HRMS (ESI/TOF) calcd for C<sub>21</sub>H<sub>24</sub>ClN<sub>2</sub>O<sub>2</sub><sup>-</sup> [M+Cl]<sup>-</sup>: 371.1532, found: 371.1493. IR (NaCl):  $\nu$  [cm<sup>-1</sup>] = 3084, 2944, 2872, 2840, 2244, 1701, 1610, 1580, 1515, 1461, 1417, 1295, 1256, 1185, 1130, 1084, 1033, 993, 936, 838, 813, 768, 742.

**2-Allyl-2-((S)-(4-methoxyphenyl)((R)-1-methyl-2-oxocyclohexyl)methyl)malononitrile**

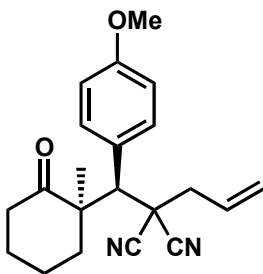

**4j**

Synthesised according to the general procedure. Purified by flash chromatography (hexanes/EtOAc 8:1 to 6:1 to 4:1, MnO<sub>4</sub> stain,  $R_f = 0.30$  in hexanes/EtOAc 6:1) and isolated as a colorless oil that solidifies on standing.  $[\alpha]_D^{25} = +42.45^\circ$  ( $c = 0.73$ , CH<sub>2</sub>Cl<sub>2</sub>, 88% ee). <sup>1</sup>H NMR (500 MHz, CDCl<sub>3</sub>):  $\delta = 1.35$  (ddd,  $J = 5.0, 11.0, 14.0$  Hz, 1H), 1.46 (ttd,  $J = 1.5, 3.0, 14.0$  Hz, 1H), 1.57- 1.64 (m, 1H), 1.66-1.76 (m, 2H), 1.75 (s, 3H), 1.94- 2.00 (m, 1H), 2.47 (td,  $J = 4.0, 13.0$  Hz, 1H), 2.54 (tdd,  $J = 1.5, 6.5, 14.0$  Hz, 1H), 2.57 (tdd,  $J = 1.0, 7.5, 14.0$  Hz, 1H), 2.74 (ddd,  $J = 6.0, 11.5, 13.0$  Hz, 1H), 3.81 (s, 3H), 3.87 (s, 1H), 5.29 (ddd,  $J = 1.0, 2.5, 17.0$  Hz, 1H), 5.39 (d,  $J = 10.0$  Hz, 1H), 5.92 (dddd,  $J = 7.0, 7.5, 10.0, 17.0$  Hz, 1H), 6.84 (br, 1H), 6.94 (br, 1H), 7.02 (br, 1H), 7.71 (br, 1H). <sup>13</sup>C NMR (125 MHz, CDCl<sub>3</sub>):  $\delta = 19.34, 20.84, 28.56, 38.33, 39.51, 40.87, 42.88, 52.61, 52.74, 55.20, 113.76, 114.38, 115.74, 116.19, 123.01, 125.64, 128.88, 129.61, 134.60, 159.75, 214.27$ . HRMS (ESI/TOF) calcd for C<sub>21</sub>H<sub>25</sub>N<sub>2</sub>O<sub>2</sub><sup>+</sup> [M+H]<sup>+</sup>: 337.1911, found: 337.1912. IR (NaCl):  $\nu$  [cm<sup>-1</sup>] = 3084, 2942, 2868, 2840, 2244, 1704, 1610, 1581, 1515, 1464, 1453, 1443, 1385, 1308, 1291, 1256, 1185, 1115, 1032, 989, 935, 837, 760, 740.



### 2-Allyl-2-((R)-((R)-1-methyl-2-oxocyclohexyl)(p-tolyl)methyl)malononitrile

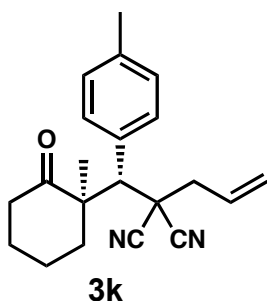

Synthesised according to the general procedure. Purified by flash chromatography (hexanes/EtOAc 8:1 to 6:1 to 4:1, MnO<sub>4</sub> stain,  $R_f = 0.45$  in hexanes/EtOAc 6:1) and isolated as a colorless oil that solidifies on standing.  $[\alpha]_D^{25} = -43.98^\circ$  ( $c = 0.84$ , CH<sub>2</sub>Cl<sub>2</sub>, 75% ee). <sup>1</sup>H nmr (500 MHz, CDCl<sub>3</sub>):  $\delta = 0.80$  (s, 3H), 1.77-1.86 (m, 1H), 1.98-2.05 (m, 3H), 2.36 (s, 3H), 2.36 (d,  $J = 12.0$  Hz, 1H), 2.50-2.63 (m, 5H), 4.28 (s, 1H), 5.30 (ddd,  $J = 1.0, 2.5, 17.0$  Hz, 1H), 5.40 (ddd,  $J = 1.0, 2.0, 10.0$  Hz, 1H), 5.90 (dddd,  $J = 6.5, 8.0, 10.0, 17.0$  Hz, 1H), 7.04 (d,  $J = 7.0$  Hz, 1H), 7.14 (d,  $J = 7.0$  Hz, 1H), 7.22 (d,  $J = 8.0$  Hz, 1H), 7.64 (d,  $J = 8.0$  Hz, 1H). <sup>13</sup>C nmr (125 MHz, CDCl<sub>3</sub>):  $\delta = 20.82, 21.04, 24.10, 25.38, 32.91, 38.12, 39.55, 42.49, 52.06, 52.73, 115.76, 116.08, 122.93, 128.31, 128.89, 129.33, 129.73, 130.72, 133.61, 138.78, 212.62$ . HRMS (ESI/TOF) calcd for C<sub>21</sub>H<sub>25</sub>N<sub>2</sub>O<sup>+</sup>: 321.1961, found: 321.1961. IR (NaCl):  $\nu$  [cm<sup>-1</sup>] = 3084, 2945, 2871, 1701, 1643, 1613, 1589, 1515, 1452, 1418, 1377, 1321, 1288, 1269, 1229, 1191, 1130, 1083, 991, 959, 935, 898, 828, 799, 765, 738.

### 2-Allyl-2-((S)-((R)-1-methyl-2-oxocyclohexyl)(p-tolyl)methyl)malononitrile

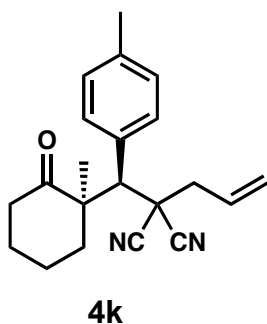

Synthesised according to the general procedure. Purified by flash chromatography (hexanes/EtOAc 8:1 to 6:1 to 4:1, MnO<sub>4</sub> stain,  $R_f = 0.45$  in hexanes/EtOAc 6:1) and isolated as a colorless oil that solidifies on standing.  $[\alpha]_D^{25} = +44.12^\circ$  ( $c = 0.695$ , CH<sub>2</sub>Cl<sub>2</sub>,

87% ee). <sup>1</sup>H nmr (500 MHz, CDCl<sub>3</sub>): δ = 1.35 (ddd, *J* = 4.0, 11.0, 14.0 Hz, 1H), 1.45 (d, *J* = 12.0 Hz, 1H), 1.56-1.63 (m, 1H), 1.68-1.75 (m, 2H), 1.76 (s, 3H), 1.94-2.01 (m, 1H), 2.35 (s, 3H), 2.47 (ddd, *J* = 4.0, 5.0, 12.0 Hz, 1H), 2.53 (tdd, *J* = 1.0, 7.0, 14.0, 1H), 2.57 (dd, *J* = 7.5, 14.0 Hz, 1H), 2.74 (ddd, *J* = 6.0, 11.5, 13.0 Hz, 1H), 3.89 (s, 1H), 5.29 (ddd, *J* = 1.5, 2.5, 17.0 Hz, 1H), 5.39 (d, *J* = 10.0 Hz, 1H), 5.92 (dddd, *J* = 7.0, 7.5, 10.0, 17.0 Hz, 1H), 7.00 (br, 1H), 7.14 (br, 1H), 7.68 (br, 1H). <sup>13</sup>C nmr (125 MHz, CDCl<sub>3</sub>): δ = 19.33, 20.83, 21.02, 28.60, 38.34, 39.42, 40.89, 42.89, 52.63, 52.91, 115.72, 116.18, 123.02, 128.37, 128.87, 129.32, 129.62, 130.71, 133.30, 138.76, 214.23. HRMS (ESI/TOF) calcd for C<sub>21</sub>H<sub>25</sub>N<sub>2</sub>O<sup>+</sup>: 321.1961, found: 321.1963. IR (NaCl): ν [cm<sup>-1</sup>] = 3084, 2944, 2867, 2245, 1705, 1643, 1613, 1516, 1452, 1419, 1384, 1307, 1266, 1227, 1126, 1113, 1084, 1065, 989, 935, 826, 798, 738, 703.

**2-Allyl-2-((*R*)-(4-(dimethylamino)phenyl)((*R*)-1-methyl-2-oxocyclohexyl)methyl)malononitrile**

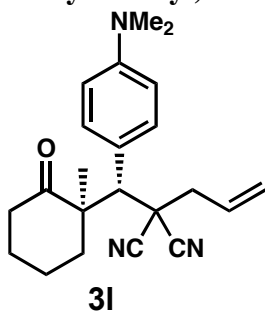

Synthesised according to the general procedure. Purified by flash chromatography (hexanes/EtOAc 6:1, MnO<sub>4</sub> stain, *R<sub>f</sub>* = 0.40 in hexanes/EtOAc 6:1) and isolated as a colorless oil that solidifies on standing. [α]<sub>D</sub><sup>25</sup> = -58.63° (c = 0.030, CH<sub>2</sub>Cl<sub>2</sub>, ee nd). <sup>1</sup>H nmr (500 MHz, CDCl<sub>3</sub>): δ = 0.83 (s, 3H), 1.77-1.86 (m, 1H), 1.98-2.08 (m, 3H), 2.35 (d, *J* = 13.5 Hz, 1H), 2.47-2.63 (m, 5H), 2.97 (s, 6H), 4.18 (s, 1H), 5.31 (ddd, *J* = 1.0, 2.5, 17.0 Hz, 1H), 5.39 (d, *J* = 10.0 Hz, 1H), 5.91 (dddd, *J* = 6.5, 7.5, 10.0, 17.0 Hz, 1H), 6.62 (dd, *J* = 2.5, 8.5 Hz, 1H), 6.73 (dd, *J* = 2.0, 8.5 Hz, 1H), 6.99 (d, *J* = 8.5 Hz, 1H), 7.59 (d, *J* = 8.5 Hz, 1H). <sup>13</sup>C nmr (125 MHz, CDCl<sub>3</sub>): δ = 20.88, 24.17, 25.45, 32.97, 38.20, 39.76, 40.16, 42.50, 52.47, 52.56, 111.56, 112.49, 116.02, 116.31, 120.64, 122.72, 129.14, 129.16, 134.59, 150.37, 213.01. HRMS (ESI/TOF) calcd for C<sub>22</sub>H<sub>27</sub>N<sub>3</sub>O<sup>+</sup>: 350.2227, found: 350.2232. IR (NaCl): ν [cm<sup>-1</sup>] = 3084, 2944, 2870, 2808, 2243, 1700,

1611, 1525, 1449, 1358, 1270, 1230, 1200, 1168, 1127, 1083, 1069, 991, 948, 824, 756, 737.

**2-Allyl-2-((S)-(4-(dimethylamino)phenyl)((R)-1-methyl-2-oxocyclohexyl)methyl)malononitrile**

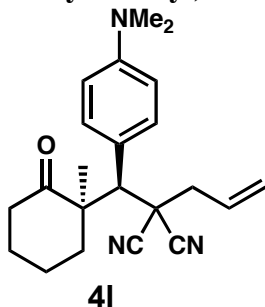

Synthesised according to the general procedure. Purified by flash chromatography (hexanes/EtOAc 6:1, MnO<sub>4</sub> stain,  $R_f = 0.35$  in hexanes/EtOAc 6:1) and isolated as a pale yellow oil.  $[\alpha]_D^{25} = +48.22^\circ$  ( $c = 0.37$ , CH<sub>2</sub>Cl<sub>2</sub>, 99% ee). <sup>1</sup>H nmr (500 MHz, CDCl<sub>3</sub>):  $\delta = 1.38$  (ddd,  $J = 4.5, 11.0, 15.0$  Hz, 1H), 1.46 (dddd,  $J = 1.5, 4.0, 5.5, 14.0$  Hz, 1H), 1.57-1.66 (m, 1H), 1.66-1.74 (m, 1H), 1.75 (s, 3H), 1.92-1.99 (m, 1H), 2.49 (ddd,  $J = 4.0, 5.0, 13.0$  Hz, 1H), 2.53-2.61 (m, 2H), 2.73 (ddd,  $J = 6.0, 11.0, 13.0$  Hz, 1H), 2.97 (s, 6H), 3.81 (s, 1H), 5.29 (ddd,  $J = 1.5, 3.0, 17.0$  Hz, 1H), 5.38 (d,  $J = 10.0$  Hz, 1H), 5.93 (dddd,  $J = 7.0, 7.5, 10.0, 17.0$  Hz, 1H), 6.61 (br, 1H), 6.72 (br, 1H), 6.95 (br, 1H), 7.62 (br, 1H). <sup>13</sup>C nmr (125 MHz, CDCl<sub>3</sub>):  $\delta = 19.27, 20.87, 28.74, 38.43, 39.64, 40.11, 41.03, 42.91, 52.66, 53.01, 111.41, 112.42, 115.09, 116.39, 120.48, 122.83, 129.05, 129.12, 134.25, 150.30, 214.64$ . HRMS (ESI/TOF) calcd for C<sub>22</sub>H<sub>27</sub>N<sub>3</sub>O<sup>+</sup>: 350.2227, found: 350.2231. IR (NaCl):  $\nu$  [cm<sup>-1</sup>] = 3083, 2981, 2943, 2867, 2808, 2244, 1704, 1612, 1525, 1447, 1359, 1230, 1199, 1166, 1128, 1064, 989, 947, 823, 736.

**2-Allyl-2-((R)-furan-2-yl)((R)-1-methyl-2-oxocyclohexyl)methyl)malononitrile**

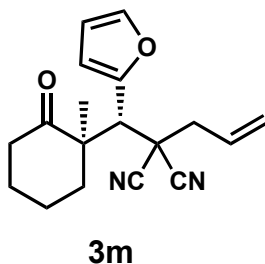

Synthesised according to the general procedure. Purified by flash chromatography (hexanes/EtOAc 10:1 to 6:1 to 4:1, MnO<sub>4</sub> stain,  $R_f = 0.45$  in hexanes/EtOAc 6:1) and isolated as a colorless oil.  $[\alpha]_D^{25} = -111.77^\circ$  ( $c = 0.48$ , CH<sub>2</sub>Cl<sub>2</sub>, 65% ee). <sup>1</sup>H NMR (500 MHz, CDCl<sub>3</sub>):  $\delta = 0.88$  (s, 3H), 1.76-1.85 (m, 1H), 1.94-2.06 (m, 3H), 2.40-2.61 (m, 4H), 2.64 (dd,  $J = 7.5, 14.0$  Hz, 1H), 2.68 (tdd,  $J = 1.0, 7.0, 14.0$  Hz, 1H), 4.41 (s, 1H), 5.36 (ddd,  $J = 1.0, 2.5, 17.0$  Hz, 1H), 5.43 (d,  $J = 10.0$  Hz, 1H), 5.90 (dddd,  $J = 6.5, 8.0, 10.0, 17.0$  Hz, 1H), 6.39 (dd,  $J = 2.0, 3.0$  Hz, 1H), 6.46 (dd,  $J = 0.5, 3.0$  Hz, 1H), 7.46 (d,  $J = 2.0$  Hz, 1H). <sup>13</sup>C NMR (125 MHz, CDCl<sub>3</sub>):  $\delta = 20.70, 24.15, 24.37, 32.62, 37.85, 38.33, 42.51, 47.53, 52.25, 110.54, 112.31, 115.21, 115.45, 123.23, 128.61, 143.34, 148.21, 212.00$ . HRMS (ESI/TOF) calcd for C<sub>18</sub>H<sub>24</sub>N<sub>3</sub>O<sub>2</sub><sup>+</sup> [M+NH<sub>4</sub>]<sup>+</sup>: 314.1863, found: 314.1860. IR (NaCl):  $\nu$  [cm<sup>-1</sup>] = 3122, 3086, 2945, 2872, 2246, 1702, 1500, 1459, 1418, 1378, 1320, 1284, 1237, 1211, 1149, 1130, 1072, 1018, 991, 932, 748.

**2-Allyl-2-((S)-furan-2-yl((R)-1-methyl-2-oxocyclohexyl)methyl)malononitrile**

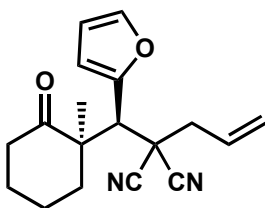

**4m**

Synthesised according to the general procedure. Purified by flash chromatography (hexanes/EtOAc 10:1 to 6:1 to 4:1, MnO<sub>4</sub> stain,  $R_f = 0.35$  in hexanes/EtOAc 6:1) and isolated as a colorless oil.  $[\alpha]_D^{25} = +71.74^\circ$  ( $c = 0.792$ , CH<sub>2</sub>Cl<sub>2</sub>, 81% ee). <sup>1</sup>H NMR (500 MHz, CDCl<sub>3</sub>):  $\delta = 1.37$  (ddd,  $J = 4.5, 11.0, 14.0$  Hz, 1H), 1.46 (dtd,  $J = 2.5, 5.0, 14.0$  Hz, 1H), 1.60-1.81 (m, 3H), 1.79 (s, 3H), 1.98-2.05 (m, 1H), 2.43 (dtd,  $J = 1.5, 5.0, 13.0$  Hz, 1H), 2.63 (d,  $J = 7.0$  Hz, 2H), 2.74 (ddd,  $J = 5.5, 11.0, 13.0$  Hz, 1H), 4.14 (s, 1H), 5.35 (ddd,  $J = 1.0, 2.5, 17.0$  Hz, 1H), 5.43 (ddd,  $J = 1.0, 2.0, 10.0$  Hz, 1H), 5.94 (tdd,  $J = 7.0, 10.0, 17.0$  Hz, 1H), 6.39 (dd,  $J = 1.5, 3.0$  Hz, 1H), 6.44 (dd,  $J = 1.0, 3.0$  Hz, 1H), 7.46 (dd,  $J = 0.5, 2.0$  Hz, 1H). <sup>13</sup>C NMR (125 MHz, CDCl<sub>3</sub>):  $\delta = 18.34, 20.69, 29.08, 38.10, 38.14, 39.94, 42.69, 47.46, 53.11, 110.56, 112.02, 115.08, 115.56, 123.33, 128.60, 143.12, 148.11, 213.59$ . HRMS (ESI/TOF) calcd for C<sub>18</sub>H<sub>20</sub>N<sub>2</sub>O<sub>2</sub>K<sup>+</sup>: 335.1156, found:

335.1158. IR (NaCl):  $\nu$  [cm<sup>-1</sup>] = 3123, 3086, 2945, 2868, 2247, 1706, 1500, 1450, 1390, 1307, 1238, 1209, 1149, 1016, 990, 932, 813, 752.

**2-Allyl-2-((R)-((R)-1-ethyl-2-oxocyclohexyl)(furan-2-yl)methyl)malononitrile**

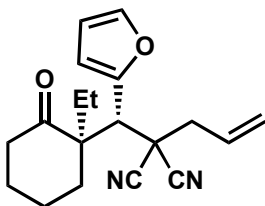

**3n**

Synthesised according to the general procedure. Purified by flash chromatography (hexanes/EtOAc 8:1, MnO<sub>4</sub> stain,  $R_f$  = 0.4) and isolated as a colorless oil.  $[\alpha]_D^{25}$  = -385.46° (c = 0.53, CH<sub>2</sub>Cl<sub>2</sub>, 89% ee). <sup>1</sup>H NMR (500 MHz, CDCl<sub>3</sub>):  $\delta$  = 0.48 (t,  $J$  = 7.5 Hz, 3H), 1.04 (qd,  $J$  = 7.5, 15.0 Hz, 1H), 1.84-2.04 (m, 5H), 2.33-2.40 (m, 1H), 2.48 (dd,  $J$  = 3.5, 8.5 Hz, 2H), 2.56 (ddd,  $J$  = 3.5, 5.5, 16.0 Hz, 1H), 2.70 (d,  $J$  = 7.0 Hz, 2H), 4.41 (s, 1H), 5.36 (d,  $J$  = 17.0 Hz, 1H), 5.42 (d,  $J$  = 10.0 Hz, 1H), 5.92 (tdd,  $J$  = 7.5, 10.0, 17.0 Hz, 1H), 6.40 (dd,  $J$  = 2.0, 3.5 Hz, 1H), 6.44 (dd,  $J$  = 0.9, 3.3 Hz, 1H), 7.47 (d,  $J$  = 1.5 Hz, 1H). <sup>13</sup>C NMR (125 MHz, CDCl<sub>3</sub>):  $\delta$  = 7.47, 20.74, 24.60, 28.16, 32.73, 38.68, 38.94, 42.62, 45.38, 55.66, 110.56, 112.43, 115.35, 115.59, 123.09, 128.80, 143.33, 148.15, 210.68. HRMS (ESI/TOF) calcd for C<sub>19</sub>H<sub>26</sub>N<sub>3</sub>O<sub>2</sub><sup>+</sup> [M+NH<sub>4</sub>]<sup>+</sup>: 328.2020, found: 328.2020. IR (NaCl):  $\nu$  [cm<sup>-1</sup>] = 3123, 2945, 2877, 2246, 1701, 1500, 1458, 1418, 1390, 1318, 1229, 1208, 1150, 1128, 1075, 1017, 991, 931, 778, 756.

**2-Allyl-2-((S)-((R)-1-ethyl-2-oxocyclohexyl)(furan-2-yl)methyl)malononitrile**

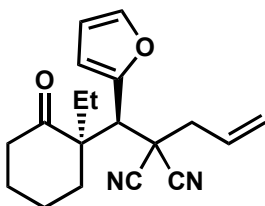

**4n**

Synthesised according to the general procedure. Purified by flash chromatography (hexanes/EtOAc 8:1, MnO<sub>4</sub> stain,  $R_f$  = 0.3) and isolated as a colorless oil.  $[\alpha]_D^{25}$  = -13.39° (c = 0.622, CH<sub>2</sub>Cl<sub>2</sub>, 96% ee). <sup>1</sup>H NMR (500 MHz, CDCl<sub>3</sub>):  $\delta$  = 0.91 (t,  $J$  = 7.5

Hz, 3H), 1.57-1.66 (m, 1H), 1.70-1.83 (m, 2H), 1.84-1.91 (m, 1H), 2.03 (qd,  $J = 7.5, 15.0$  Hz, 1H), 2.11 (ddd,  $J = 5.0, 10.0, 14.0$  Hz, 1H), 2.18 (dtd,  $J = 2.0, 4.5, 14.0$  Hz, 1H), 2.30-2.51 (m, 5H), 4.08 (s, 1H), 5.33 (ddd,  $J = 1.0, 2.5, 17.0$  Hz, 1H), 5.43 (d,  $J = 10.0$  Hz, 1H), 5.90 (dddd,  $J = 7.0, 7.5, 10.0, 17.0$  Hz, 1H), 6.37 (dd,  $J = 2.0, 3.5$  Hz, 1H), 6.43 (dd,  $J = 0.5, 3.5$  Hz, 1H), 7.43 (dd,  $J = 1.0, 2.0$  Hz, 1H).  $^{13}\text{C}$  NMR (125 MHz,  $\text{CDCl}_3$ ):  $\delta = 8.79, 20.75, 25.52, 26.47, 33.65, 36.97, 38.94, 43.18, 45.76, 56.54, 110.80, 111.79, 115.05, 115.45, 123.88, 128.25, 142.40, 149.11, 210.79$ . HRMS (ESI/TOF) calcd for  $\text{C}_{19}\text{H}_{26}\text{N}_3\text{O}_2^+ [\text{M}+\text{NH}_4]^+$ : 328.2020, found: 328.2020. IR (NaCl):  $\nu [\text{cm}^{-1}] = 3123, 2946, 2882, 2247, 1704, 1499, 1457, 1445, 1419, 1385, 1315, 1226, 1149, 1019, 992, 932, 814, 744$ .

**2-Allyl-2-((*R*)-benzo[*d*][1,3]dioxol-5-yl)((*R*)-1-methyl-2-oxocyclohexyl)methyl)malononitrile**

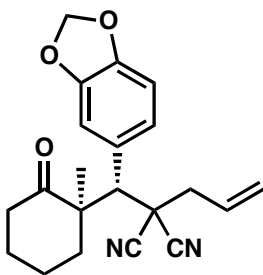

**30**

Synthesised according to the general procedure. Purified by flash chromatography (hexanes/EtOAc 6:1,  $\text{MnO}_4$  stain,  $R_f = 0.35$ ) and isolated as a yellow powder. The  $^1\text{H}$  nmr spectrum shows a mixture of two rotamers (ratio 1:1.38).  $[\alpha]_{\text{D}}^{25} = -22.38^\circ$  ( $c = 0.53$ ,  $\text{CH}_2\text{Cl}_2$ , 56% ee).  $^1\text{H}$  nmr (500 MHz,  $\text{CDCl}_3$ ):  $\delta = 0.84$  (s, 1.26H), 0.84 (s, 1.74 H), 1.77-1.87 (m, 1H), 1.97-2.05 (m, 3H), 2.32 (d,  $J = 13.5$  Hz, 1H), 2.48-2.73 (m, 5H), 4.21 (s, 0.42H), 4.27 (s, 0.58H), 5.32 (d,  $J = 17.0$  Hz, 1H), 5.41 (d,  $J = 10.0$  Hz, 1H), 5.91 (tdd,  $J = 7.5, 10.0, 17.0$  Hz, 1H), 5.99 (s, 0.84H), 6.00 (s, 1.16H), 6.65 (d,  $J = 7.5$  Hz, 1H), 6.75 (d,  $J = 7.5$  Hz, 0.58H), 6.86 (d,  $J = 7.5$  Hz, 0.42H), 7.23 (br, 1H).  $^{13}\text{C}$  nmr (125 MHz,  $\text{CDCl}_3$ ):  $\delta = 20.82, 20.84, 24.05, 25.27, 25.30, 32.73, 32.79, 38.10, 39.38, 39.77, 42.52, 42.54, 52.14, 52.30, 52.68, 52.84, 52.86, 101.34, 101.56, 108.11, 108.72, 108.85, 113.73, 115.67, 116.05, 122.14, 123.02, 123.06, 127.11, 127.18, 127.39, 128.86, 147.70, 147.94, 148.12, 148.31, 212.51, 212.53$ . HRMS (ESI/TOF) calcd for  $\text{C}_{21}\text{H}_{23}\text{N}_2\text{O}_3^+$ : 351.1703,

found: 351,1700. IR (NaCl):  $\nu$  [ $\text{cm}^{-1}$ ] = 3084, 2944, 2872, 2244, 1701, 1610, 1506, 1489, 1446, 1417, 1374, 1318, 1252, 1239, 1129, 1080, 1038, 992, 930, 863, 818, 775, 740.

**2-Allyl-2-((S)-benzo[d][1,3]dioxol-5-yl)((R)-1-methyl-2-oxocyclohexyl)methyl)malononitrile**

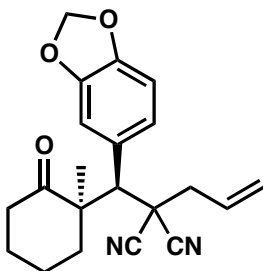

**4o**

Synthesised according to the general procedure. Purified by flash chromatography (hexanes/EtOAc 6:1,  $\text{MnO}_4$  stain,  $R_f = 0.30$ ) and isolated as a yellow powder.  $[\alpha]_D^{25} = +44.08^\circ$  ( $c = 0.73$ ,  $\text{CH}_2\text{Cl}_2$ , 95% ee).  $^1\text{H}$  nmr (500 MHz,  $\text{CDCl}_3$ ):  $\delta = 1.39$  (t,  $J = 10.5$  Hz, 1H), 1.51 (d,  $J = 14.0$  Hz, 1H), 1.59-1.63 (m, 1H), 1.69-1.80 (m, 2H), 1.74 (s, 3H), 1.97-2.01 (m, 1H), 2.45 (td,  $J = 5.0, 13.5$  Hz, 1H), 2.58 (d,  $J = 7.0$  Hz, 1H), 2.75 (ddd,  $J = 6.0, 11.5, 13.5$  Hz, 1H), 3.84 (s, 1H), 5.31 (d,  $J = 17.0$  Hz, 1H), 5.41 (d,  $J = 10.0$  Hz, 1H), 5.93 (tdd,  $J = 7.0, 10.0, 17.0$  Hz, 1H), 6.00 (s, 2H), 6.59 (br, 1H), 6.73 (d,  $J = 7.5$  Hz, 0.61H), 6.87 (d,  $J = 6.5$  Hz, 0.39H), 7.27 (s, 1H).  $^{13}\text{C}$  nmr (125 MHz,  $\text{CDCl}_3$ ):  $\delta = 19.32, 20.89, 28.55, 38.28, 39.40, 39.63, 40.64, 40.89, 42.90, 52.65, 52.84, 101.34, 101.53, 107.94, 108.88, 113.59, 115.69, 116.14, 122.20, 123.10, 126.87, 127.16, 128.88, 147.65, 147.88, 148.06, 148.25, 214.20$ . HRMS (ESI/TOF) calcd for  $\text{C}_{21}\text{H}_{23}\text{N}_2\text{O}_3^+$ : 351.1703, found: 351,1701. IR (NaCl):  $\nu$  [ $\text{cm}^{-1}$ ] = 3084, 2944, 2870, 2244, 2226, 1703, 1610, 1575, 1506, 1489, 1447, 1385, 1373, 1307, 1249, 1104, 1039, 989, 930, 868, 820, 740.

**2-Allyl-2-((*R,E*)-1-((*R*)-1-methyl-2-oxocyclohexyl)-3-phenylallyl)malononitrile**

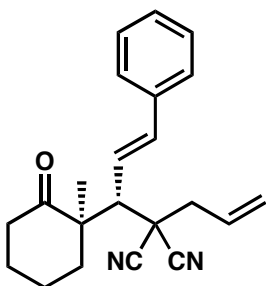

**3p**

Synthesised according to the general procedure. Purified by flash chromatography (hexanes/EtOAc 10:1, MnO<sub>4</sub> stain,  $R_f = 0.30$ ) and isolated as an off-white solid that contains a small amount of unreacted Michael acceptor (unseparable mixture).  $[\alpha]_D^{25} = +50.73^\circ$  ( $c = 0.11$ , CH<sub>2</sub>Cl<sub>2</sub>, 58% ee). <sup>1</sup>H nmr (500 MHz, CDCl<sub>3</sub>):  $\delta = 1.12$  (s, 3H), 1.78-1.86 (m, 1H), 1.97-2.06 (m, 4H), 2.33 (dt,  $J = 3.5, 13.0$  Hz, 1H), 2.49-2.59 (m, 2H), 2.74 (dd,  $J = 7.5, 14.0$  Hz, 1H), 2.83 (tdd,  $J = 1.0, 7.0, 14.0$  Hz, 1H), 3.61 (d,  $J = 11.0$  Hz, 1H), 5.39 (ddd,  $J = 1.0, 2.5, 17.0$  Hz, 1H), 5.44 (d,  $J = 10.0$  Hz, 1H), 5.95 (dddd,  $J = 6.5, 7.5, 10.0, 17.0$  Hz, 1H), 6.16 (dd,  $J = 11.0, 16.0$  Hz, 1H), 6.62 (d,  $J = 16.0$  Hz, 1H), 7.32 (tt,  $J = 1.0, 7.0$  Hz, 1H), 7.36 (t,  $J = 7.0$  Hz, 2H), 7.43 (d,  $J = 7.0$  Hz, 1H). <sup>13</sup>C nmr (125 MHz, CDCl<sub>3</sub>):  $\delta = 20.63, 24.24, 25.62, 32.22, 38.12, 38.92, 41.96, 51.30, 52.00, 114.97, 115.44, 121.31, 123.02, 126.78, 128.70, 128.79, 128.83, 135.45, 138.81, 212.84$ . GHMBC (500 MHz, CDCl<sub>3</sub>): (3.61, 114.60) and (3.61, 115.06) indicating the CH of the tertiary stereocenter next to the two nitrile groups. HRMS (ESI/TOF) calcd for C<sub>22</sub>H<sub>25</sub>N<sub>2</sub>O<sup>+</sup>: 333.1961, found: 333.1957. IR (NaCl):  $\nu$  [cm<sup>-1</sup>] = 3084, 3060, 3029, 2944, 2871, 2243, 1699, 1645, 1600, 1497, 1450, 1418, 1378, 1286, 1266, 1221, 1132, 1075, 978, 936, 801, 760, 737, 699.



### 2-Allyl-2-((*S,E*)-1-((*R*)-1-methyl-2-oxocyclohexyl)-3-phenylallyl)malononitrile

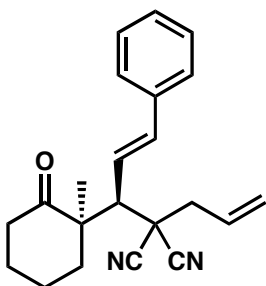

**4p**

Synthesised according to the general procedure. Purified by flash chromatography (hexanes/EtOAc 10:1, MnO<sub>4</sub> stain,  $R_f = 0.25$ ) and isolated as an off-white solid.  $[\alpha]_D^{25} = +66.70^\circ$  ( $c = 0.79$ , CH<sub>2</sub>Cl<sub>2</sub>, 82% ee). <sup>1</sup>H nmr (500 MHz, CDCl<sub>3</sub>):  $\delta = 1.60$ -1.84 (m, 5H), 1.63 (s, 3H), 2.02-2.05 (m, 1H), 2.46 (td,  $J = 4.0, 13.0$  Hz, 1H), 2.72 (td,  $J = 6.0, 12.0$  Hz, 1H), 2.78 (dd,  $J = 8.0, 14.0$  Hz, 1H), 2.84 (dd,  $J = 7.0, 14.0$  Hz, 1H), 3.32 (d,  $J = 10.5$  Hz, 1H), 5.41 (d,  $J = 17.0$  Hz, 1H), 5.45 (d,  $J = 10.0$  Hz, 1H), 5.98 (tdd,  $J = 7.0, 10.0, 17.0$  Hz, 1H), 6.18 (dd,  $J = 10.5, 16.0$  Hz, 1H), 6.59 (d,  $J = 16.0$  Hz, 1H), 7.32 (t,  $J = 7.0$  Hz, 1H), 7.37 (t,  $J = 7.5$  Hz, 2H), 7.43 (d,  $J = 7.5$  Hz, 2H). <sup>13</sup>C nmr (125 MHz, CDCl<sub>3</sub>):  $\delta = 17.99, 20.66, 29.07, 38.44, 38.77, 41.40, 42.23, 51.93, 51.99, 115.18, 121.57, 123.08, 126.71, 128.68, 128.79, 128.85, 135.36, 138.21, 214.22$ . GHMBC (500 MHz, CDCl<sub>3</sub>): (3.32, 115.18) indicating the CH of the tertiary stereocenter next to the two nitrile groups (which show up as one single signal in this case). HRMS (ESI/TOF) calcd for C<sub>22</sub>H<sub>25</sub>N<sub>2</sub>O<sup>+</sup>: 333.1961, found: 333.1961.

IR (NaCl):  $\nu$  [cm<sup>-1</sup>] = 3084, 3060, 3028, 2939, 2867, 2245, 1704, 1643, 1496, 1450, 1387, 1308, 1116, 978, 936, 759, 703.

### Methyl 2-cyano-2-((1-methyl-2-oxocyclohexyl)(phenyl)methyl)pent-4-enoate

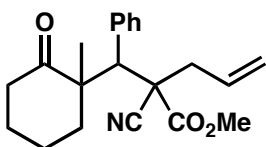

**3,4q**

Synthesised according to the general procedure. Purified by flash chromatography (hexanes/EtOAc 8:1, MnO<sub>4</sub> stain,  $R_f = 0.35$ ) and isolated as an unseparable mixture of

both diastereomers. The given nmr data was acquired from the racemic sample. The  $^1\text{H}$  nmr spectrum of the enantioenriched sample (dr 4.1:1:0:0, 64% ee, major) is attached as well.  $^1\text{H}$  nmr (500 MHz,  $\text{CDCl}_3$ ):  $\delta$  = 0.88 (s, 1.8H), 1.23-1.36 (m, 2.6H), 1.51 (s, 3H), 1.58-1.68 (m, 3.4H), 1.85-1.95 (m, 3.2H), 1.99-2.05 (m, 1.6H), 2.29-2.39 (m, 3H), 2.52-2.56 (dd,  $J$  = 7.5, 13.5 Hz, 0.6H), 2.81-2.89 (m, 1.6H), 3.71 (s, 3H), 3.73 (s, 1.8H), 3.86 (s, 1H), 3.97 (s, 0.6H), 4.98-5.11 (m, 3.2H), 5.57-5.70 (m, 1.6H), 7.12-7.14 (dt,  $J$  = 7.0, 2.0 Hz, 0.6H), 7.25-7.40 (m, 4.8H), 7.44 (t,  $J$  = 6.5 Hz, 1H), 7.84 (d,  $J$  = 8.0 Hz, 0.6H), 7.92 (d,  $J$  = 8.0 Hz, 1H).  $^{13}\text{C}$  nmr (125 MHz,  $\text{CDCl}_3$ ):  $\delta$  = 20.20, 20.47, 20.50, 24.55, 25.71, 27.57, 32.57, 38.33, 38.46, 40.19, 42.71, 44.93, 51.11, 51.43, 52.32, 53.09, 53.14, 53.17, 54.19, 54.51, 119.15, 119.72, 120.88, 120.94, 127.65, 127.95, 128.00, 128.25, 128.32, 128.35, 128.86, 129.08, 129.93, 130.65, 133.33, 133.38, 134.84, 136.10, 168.39, 168.58, 212.42, 214.56. HRMS (ESI/TOF) calcd for  $\text{C}_{21}\text{H}_{26}\text{NO}_3^+$ : 340.1907, found: 340.1907. IR (NaCl):  $\nu$  [ $\text{cm}^{-1}$ ] = 3061, 3007, 2949, 2868, 2243, 1744, 1701, 1642, 1493, 1453, 1437, 1386, 1310, 1267, 1250, 1230, 1142, 1089, 991, 932, 798, 766, 712.

**5-Allyl-2,2-dimethyl-5-((*S*)-((*R*)-1-methyl-2-oxocyclohexyl)(phenyl)methyl)-1,3-dioxane-4,6-dione**

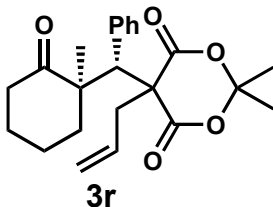

Synthesised according to the general procedure. Purified by flash chromatography (hexanes/EtOAc 6:1,  $\text{MnO}_4$  stain,  $R_f$  = 0.4) and isolated as a white amorphous solid.  $[\alpha]_D^{25}$  = +5.19° (c = 0.905,  $\text{CH}_2\text{Cl}_2$ , 22% ee).  $^1\text{H}$  nmr (500 MHz,  $\text{CDCl}_3$ ):  $\delta$  = 1.17 (ddd,  $J$  = 4.0, 12.0, 14.5 Hz, 1H), 1.24 (s, 3H), 1.29-1.37 (m, 1H), 1.48 (s, 3H), 1.54 (d,  $J$  = 14.5 Hz, 1H), 1.57 (s, 3H), 1.62-1.72 (m, 2H), 2.01-2.09 (m, 1H), 2.31 (dd,  $J$  = 7.5, 12.5 Hz, 1H), 2.45 (d,  $J$  = 12.5 Hz, 1H), 2.69 (dd,  $J$  = 7.5, 13.0 Hz, 1H), 3.07 (ddd,  $J$  = 6.5, 12.5, 13.5 Hz, 1H), 4.40 (s, 1H), 5.07 (d,  $J$  = 17.0 Hz, 1H), 5.10 (d,  $J$  = 10.0 Hz, 1H), 5.49 (ddd,  $J$  = 7.5, 10.0, 17.0 Hz, 1H), 7.24 (td,  $J$  = 2.0, 7.0 Hz, 1H), 7.30 (ddd,  $J$  = 0.5, 2.0, 7.0 Hz, 1H), 7.33 (ddd,  $J$  = 1.5, 1.5, 7.5 Hz, 1H), 7.37-7.40 (m, 1H), 7.74 (d,  $J$  = 8.0 Hz, 1H).  $^{13}\text{C}$  nmr (125 MHz,  $\text{CDCl}_3$ ):  $\delta$  = 20.48, 27.82, 28.51, 30.77, 39.09, 42.32, 43.42,

53.20, 56.07, 58.67, 106.42, 122.09, 128.14, 128.26, 128.73, 130.18, 130.89, 133.59, 135.82, 167.56, 169.07, 216.64. HRMS (ESI/TOF) calcd for  $C_{23}H_{32}NO_5^+$  [ $M+NH_4^+$ ]: 402.2275, found: 402.2275. IR (NaCl):  $\nu$  [ $cm^{-1}$ ] = 3060, 3026, 2983, 2944, 2867, 1768, 1733, 1701, 1640, 1600, 1581, 1494, 1455, 1415, 1379, 1392, 1359, 1323, 1265, 1205, 1140, 1089, 1030, 997, 937, 897, 860, 821, 765, 737, 715.

**5-Allyl-2,2-dimethyl-5-((*R*)-((*R*)-1-methyl-2-oxocyclohexyl)(phenyl)methyl)-1,3-dioxane-4,6-dione**

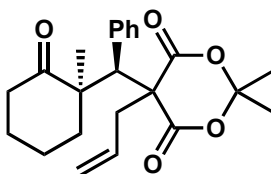

**4r**

Synthesised according to the general procedure. Purified by flash chromatography (hexanes/EtOAc 6:1,  $MnO_4$  stain,  $R_f = 0.3$ ) and isolated as a white amorphous solid.  $[\alpha]_D^{25} = -6.28^\circ$  ( $c = 0.79$ ,  $CH_2Cl_2$ , 43% ee).  $^1H$  nmr (500 MHz,  $CDCl_3$ ):  $\delta = 0.87$  (s, 3H), 1.26 (s, 3H), 1.56 (s, 3H), 1.60-1.69 (m, 1H), 1.84-1.95 (m, 4H), 2.43 (ddd,  $J = 7.0, 10.5, 16.5$  Hz, 1H), 2.50 (dddd,  $J = 2.0, 4.5, 6.0, 16.5$  Hz, 1H), 2.63 (dd,  $J = 7.0, 12.5$  Hz, 1H), 2.81 (dd,  $J = 7.5, 12.5$  Hz, 1H), 2.91 (dt,  $J = 4.0, 14.0$  Hz, 1H), 4.41 (s, 1H), 5.11 (d,  $J = 10.0$  Hz, 1H), 5.14 (d,  $J = 17.0$  Hz, 1H), 5.54 (ddd,  $J = 7.5, 10.0, 17.0$  Hz, 1H), 7.11 (td,  $J = 2.0, 7.0$  Hz, 1H), 7.24-7.33 (m, 3H), 7.49 (d,  $J = 8.0$  Hz, 1H).  $^{13}C$  nmr (125 MHz,  $CDCl_3$ ):  $\delta = 20.93, 24.33, 26.92, 27.84, 30.83, 33.48, 38.63, 41.71, 52.60, 56.28, 59.29, 106.01, 121.97, 127.80, 128.14, 128.39, 129.63, 131.49, 133.83, 136.77, 167.94, 169.05, 213.61$ . HRMS (ESI/TOF) calcd for  $C_{23}H_{32}NO_5^+$  [ $M+NH_4^+$ ]: 402.2275, found: 402.2272. IR (NaCl):  $\nu$  [ $cm^{-1}$ ] = 3060, 2979, 2943, 2870, 1769, 1734, 1700, 1640, 1600, 1495, 1415, 1453, 1392, 1379, 1320, 1298, 1264, 1203, 1159, 1130, 1083, 1028, 998, 938, 735, 706.

## 2-Allyl-2-(cyclohexylidenemethyl)malononitrile

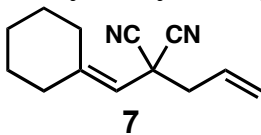

Isolated as sideproduct from the reaction of **1a** with **2k** following the conditions for racemic product synthesis (dppe as ligand). Flash chromatography (hexanes/EtOAc 15:1 yields this compound as a colorless oil.  $^1\text{H}$  nmr (300 MHz,  $\text{CDCl}_3$ ):  $\delta = 1.59$ - $1.64$  (m, 4H),  $1.67$ - $1.74$  (m, 2H),  $2.15$  (t,  $J = 6.0$  Hz, 2H),  $2.48$  (t,  $J = 6.0$  Hz, 2H),  $2.78$  (td,  $J = 1.5$ ,  $12.0$  Hz, 2H),  $5.05$  (s, 1H),  $5.42$  (tdd,  $J = 1.2$ ,  $1.5$ ,  $16.2$  Hz, 1H),  $5.43$  (tdd,  $J = 0.8$ ,  $3.0$ ,  $10.5$  Hz, 1H),  $5.91$  (tdd,  $J = 7.2$ ,  $10.5$ ,  $16.2$  Hz, 1H).  $^{13}\text{C}$  nmr (75 MHz,  $\text{CDCl}_3$ ):  $\delta = 25.68$ ,  $26.23$ ,  $28.09$ ,  $30.58$ ,  $33.25$ ,  $36.78$ ,  $43.00$ ,  $112.06$ ,  $112.08$ ,  $115.20$ ,  $123.11$ ,  $128.63$ ,  $153.13$ .

## References

1. Hegedus, L. S. *Organopalladium Chemistry in Organometallics in Synthesis A Manual*, 2nd Edition. Schlosser, M., Ed., 1127–1129 (Wiley, New York, 2002).
2. Tani, K., Behenna, D. C., McFadden, R. M. & Stoltz, B. M. A facile and modular synthesis of phosphinooxazoline ligands. *Org. Lett.* **9**, 2529–2531 (2007).
3. Mohr, J. T., Behenna, D. C., Harned, A. M. & Stoltz, B. M. Deracemization of quaternary stereocenters by Pd-catalyzed enantioconvergent decarboxylative allylation of racemic  $\beta$ -ketoesters. *Angew. Chem. Int. Ed.* **44**, 6924–6927 (2005).
4. Choudary, B. M., Kantam, M. L., Kavita, B., Reddy, Ch. V. & Figueras, F. Catalytic C–C bond formation promoted by Mg–Al–O–*t*-Bu hydrotalcite. *Tetrahedron* **56**, 9357–9364 (2000).
5. Chang, L. C. W., et al. A series of ligands displaying a remarkable agonistic–antagonistic profile at the Adenosine  $A_1$  receptor. *J. Med. Chem.* **48**, 2045–2053 (2005).
6. Cabello, J. A., Campelo, J. M., Garcia, A. Luna, D. & Marinas, J. M. Knoevenagel condensation in the heterogeneous phase using AlPO<sub>4</sub>-Al<sub>2</sub>O<sub>3</sub> as a new catalyst. *J. Org. Chem.* **49**, 5195–5197 (1984).
7. Sörgel, S., Tokunaga, N., Sasaki, K., Okamoto, K. & Hayashi, T. Rhodium/chiral diene-catalyzed asymmetric 1,4-addition of arylboronic acids to arylmethylene cyanoacetates. *Org. Lett.* **10**, 589–592 (2008).
8. Fillion, E., Fishlock, D. Wilsily, A. & Goll, J. M. Meldrum's acids as acylating agents in the catalytic intramolecular Friedel-Crafts reaction. *J. Org. Chem.* **70**, 1316–1327 (2005).
9. Yamashita, K., Tanaka, T. & Hayashi, M. Use of isopropyl alcohol as a solvent in Ti(O-*i*-Pr)<sub>4</sub>-catalyzed Knoevenagel reactions. *Tetrahedron* **61**, 7981–7985 (2005).

- 
10. Crystallographic data have been deposited at the CCDC, 12 Union Road, Cambridge CB2 1EZ, UK and copies can be obtained on request, free of charge, by quoting the publication citation and the deposition number 732239.
  11. Crystallographic data have been deposited at the CCDC, 12 Union Road, Cambridge CB2 1EZ, UK and copies can be obtained on request, free of charge, by quoting the publication citation and the deposition number 732240.

## **$^1\text{H}$ and $^{13}\text{C}$ NMR Spectra of Products 3 and 4**

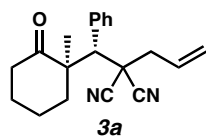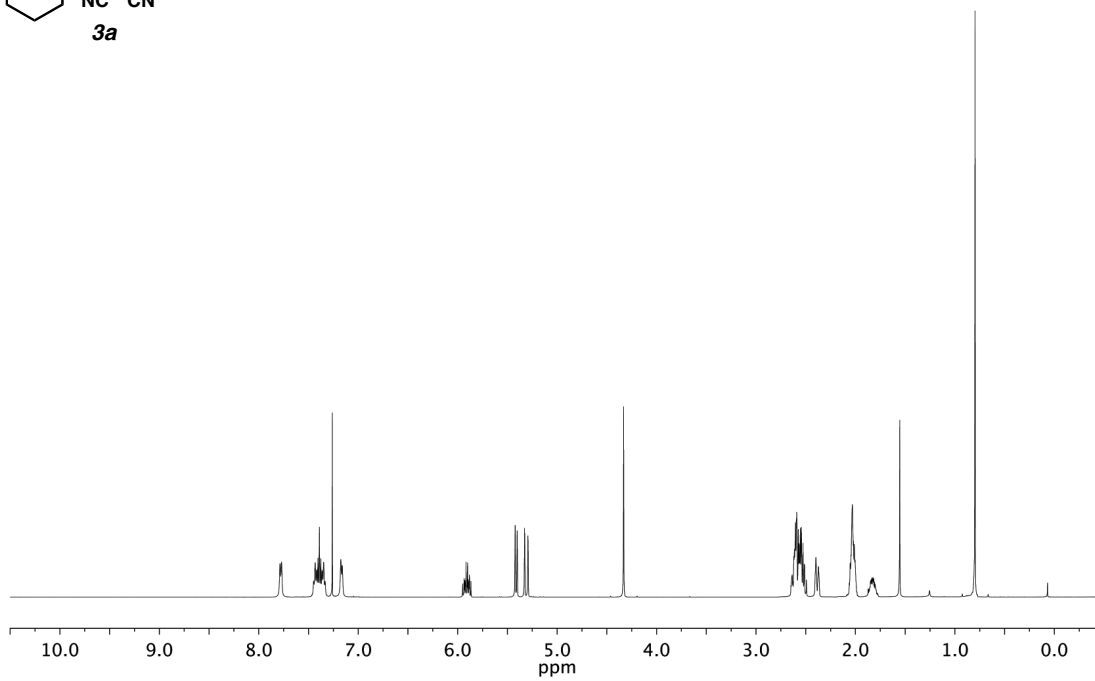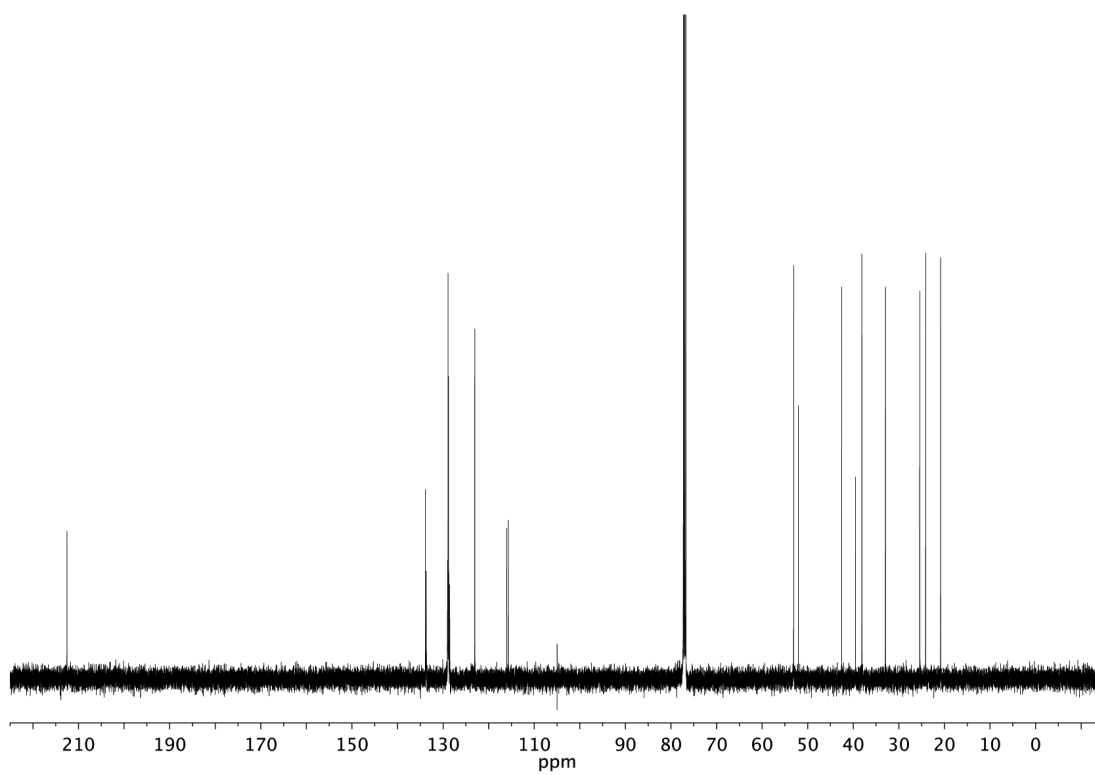

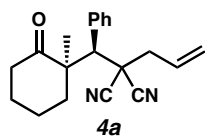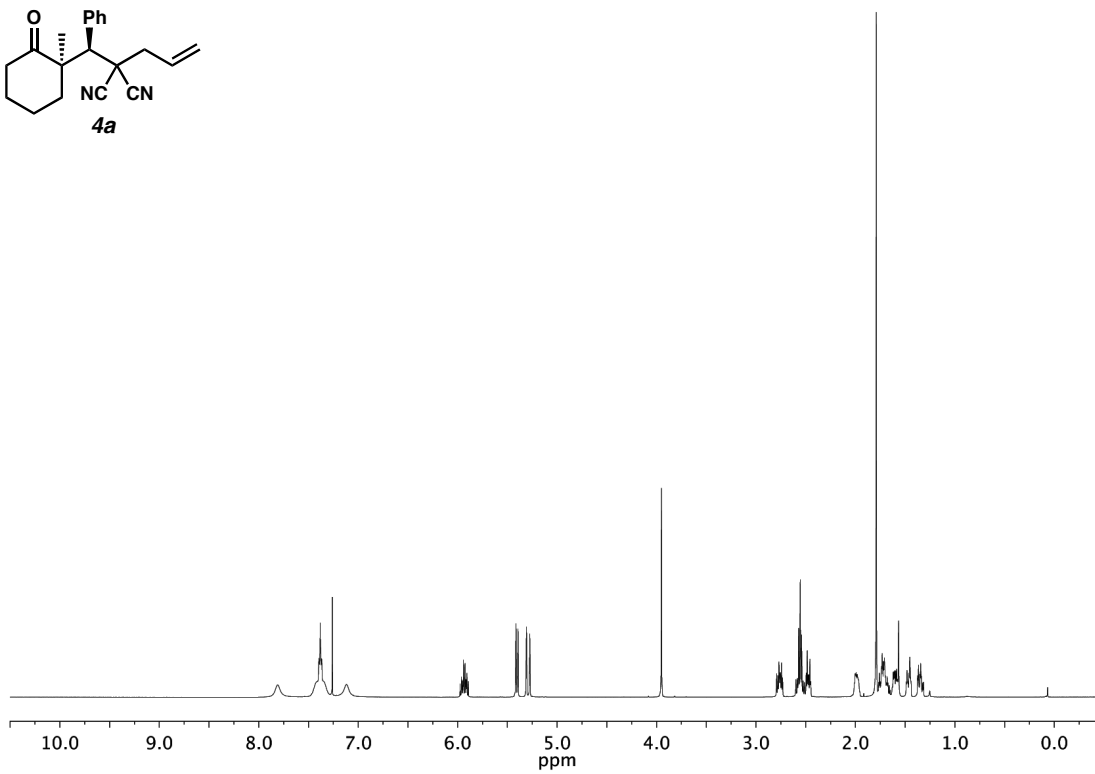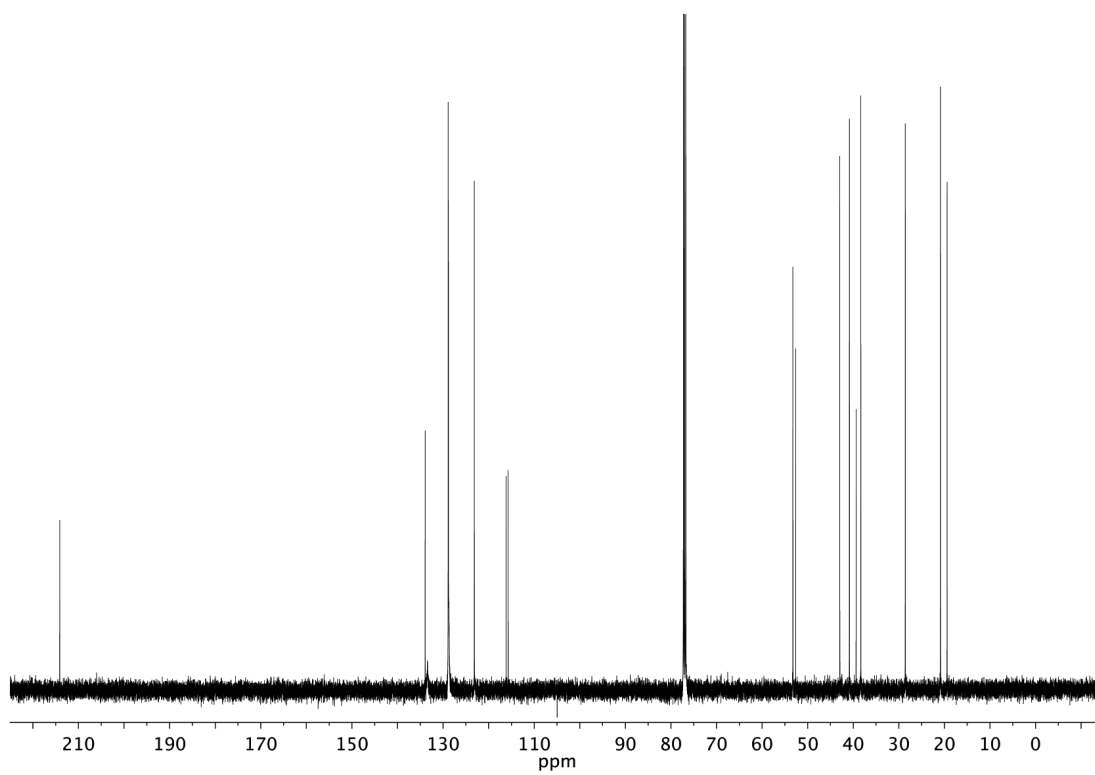



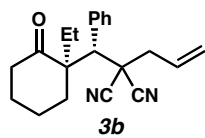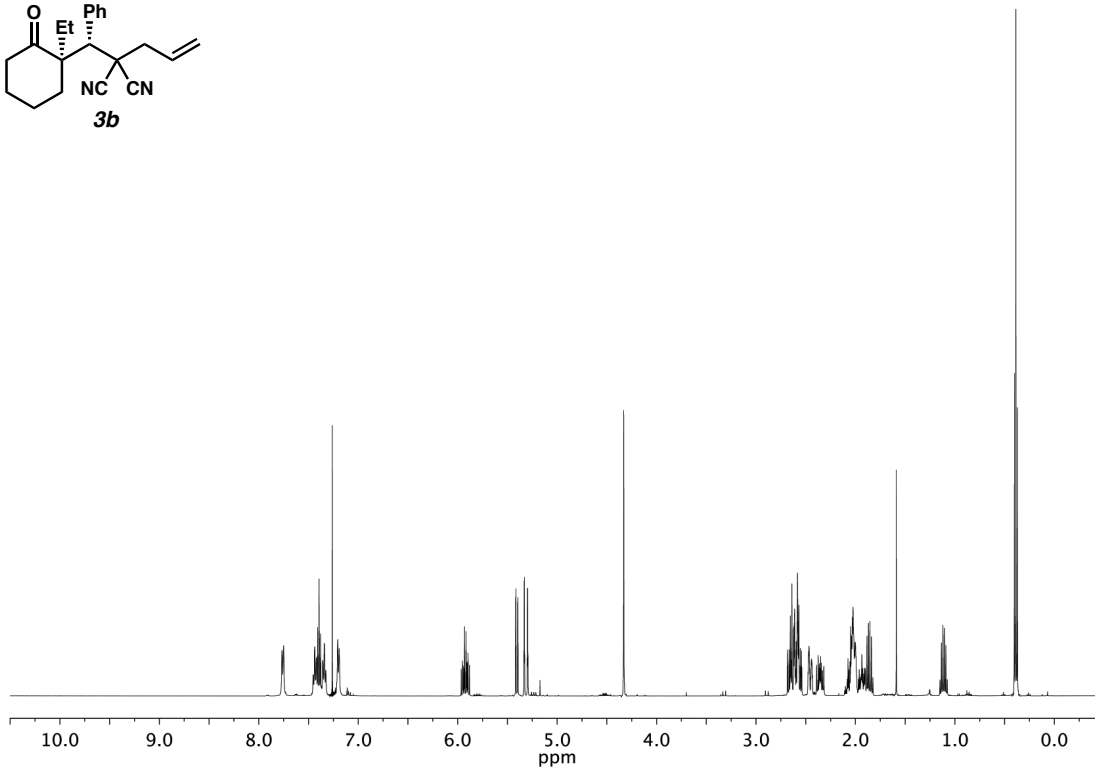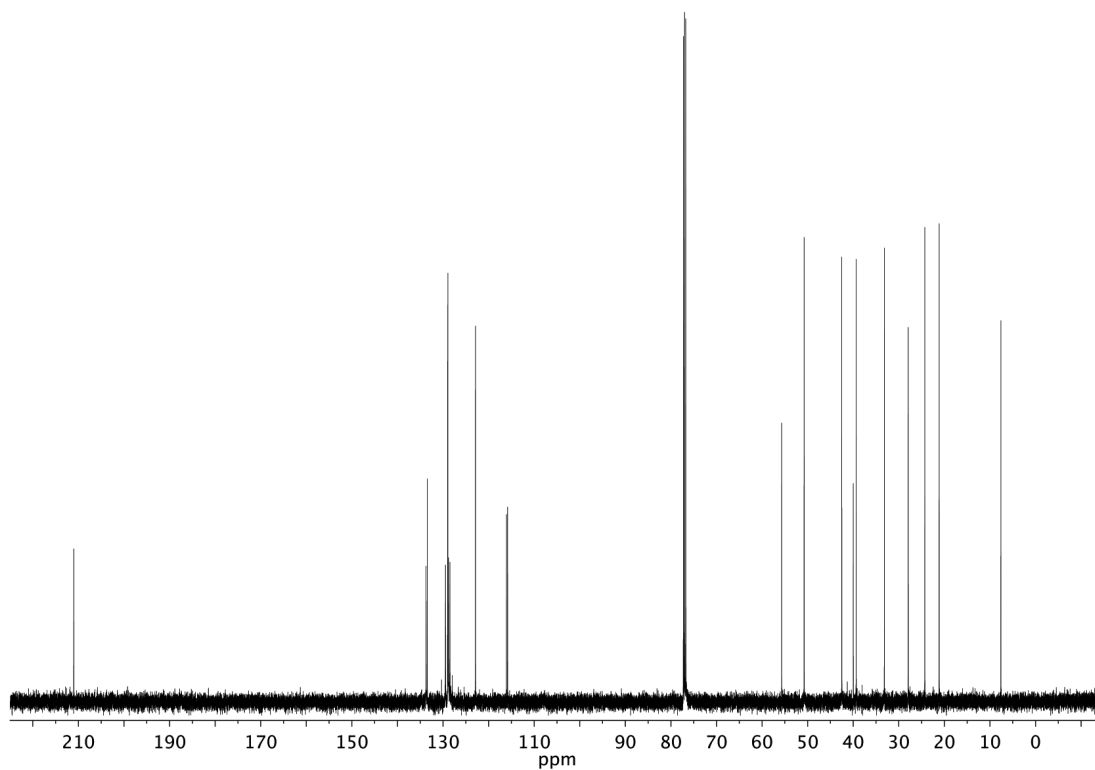

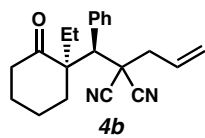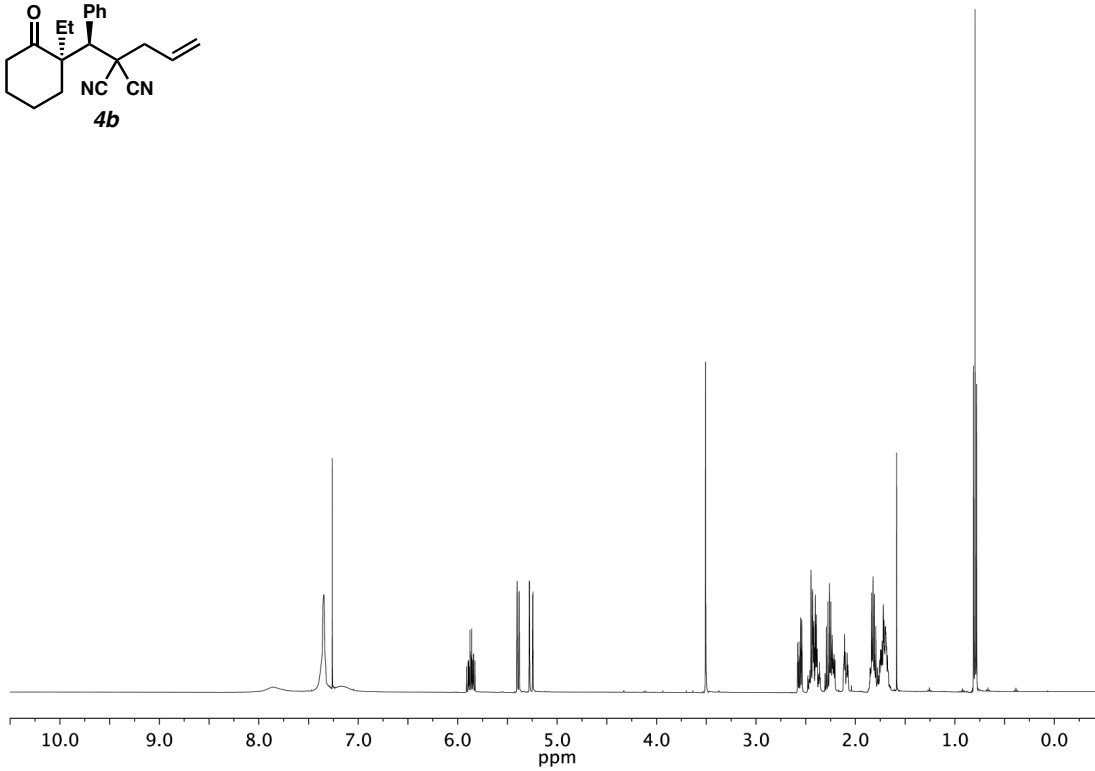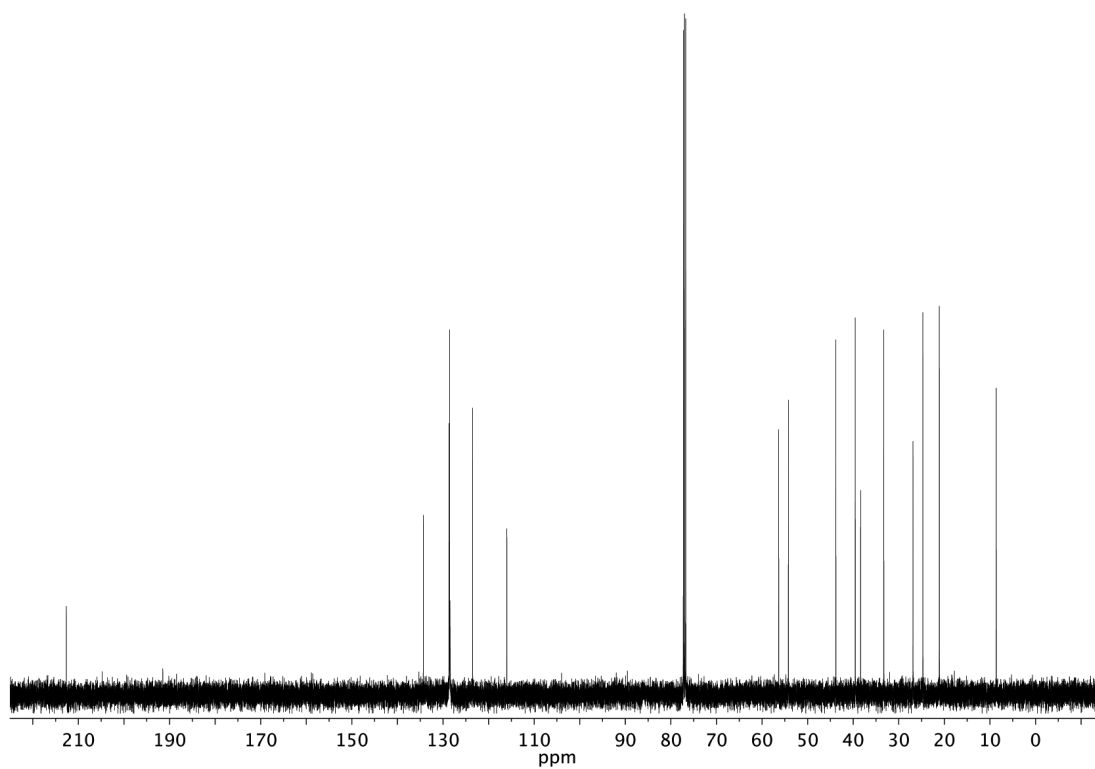

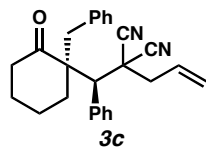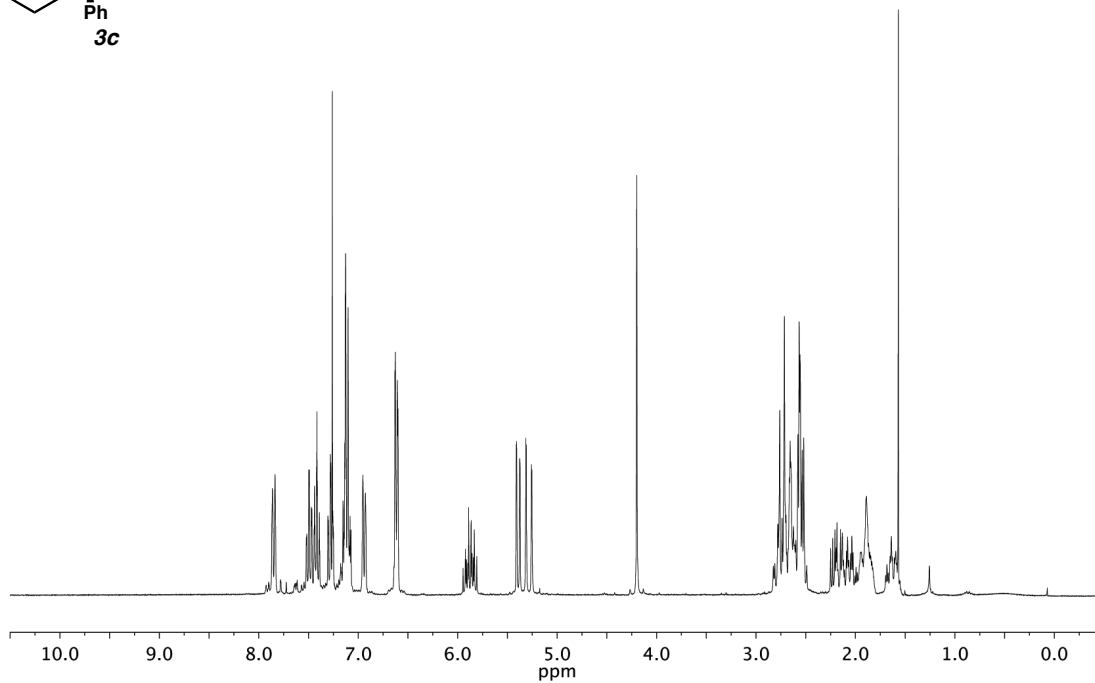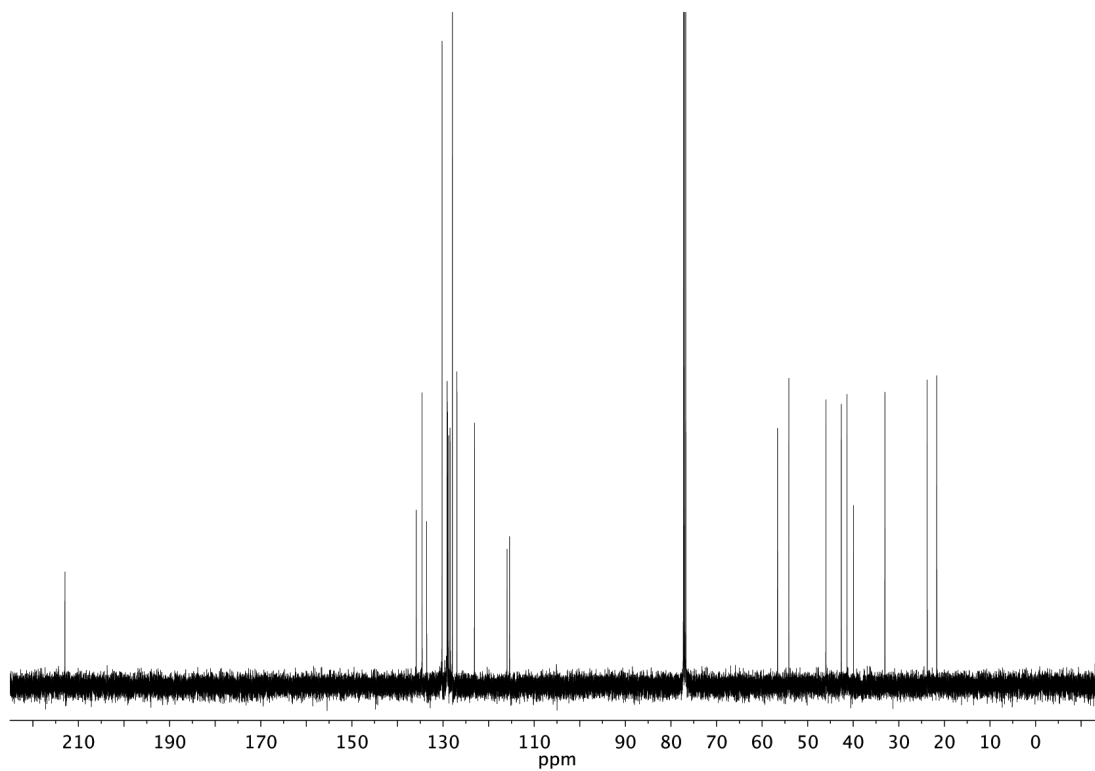

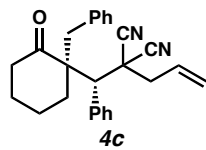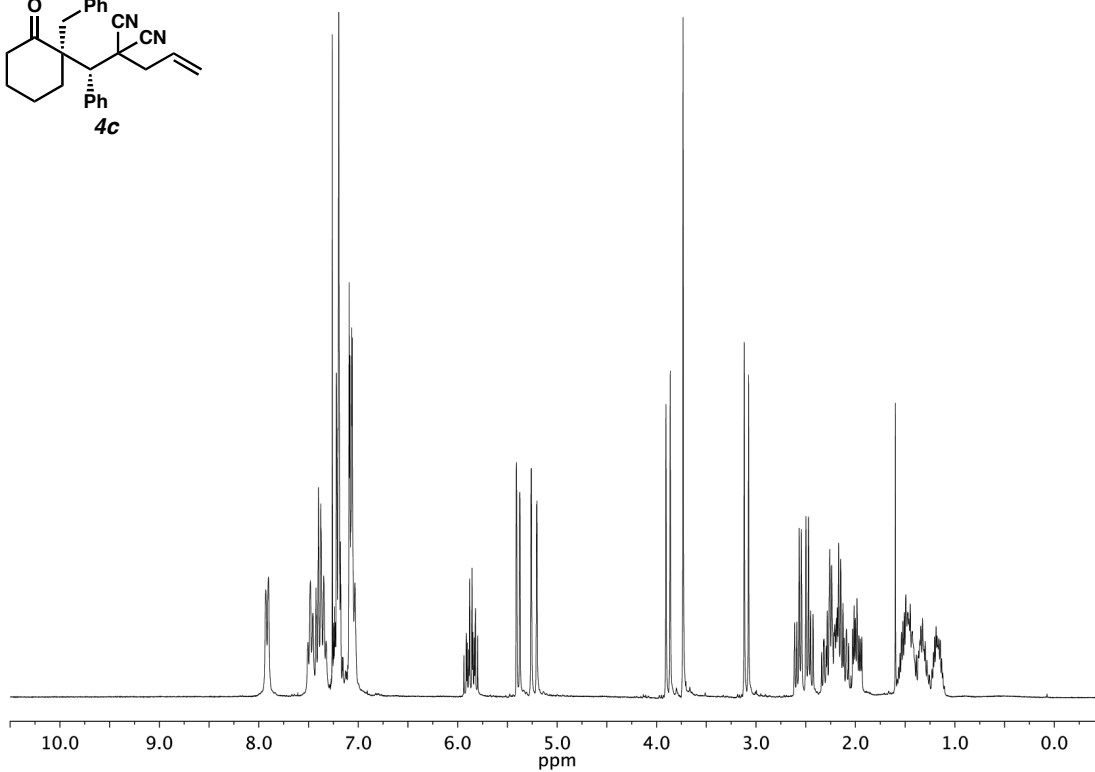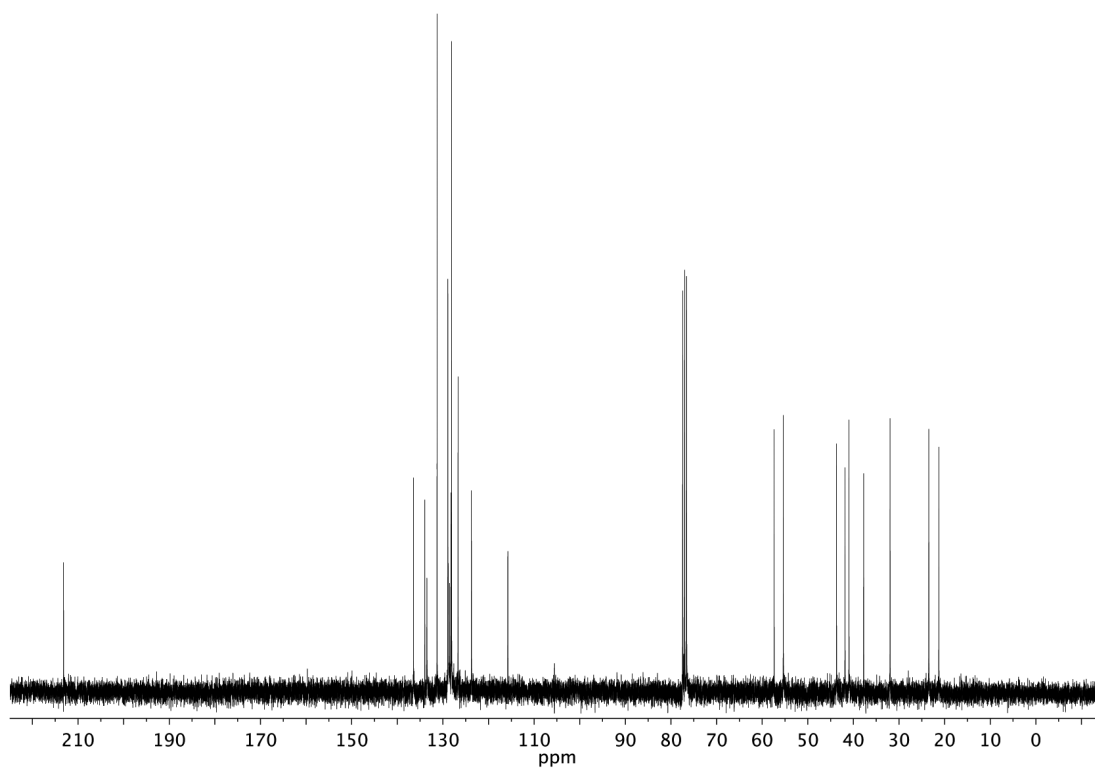

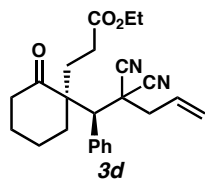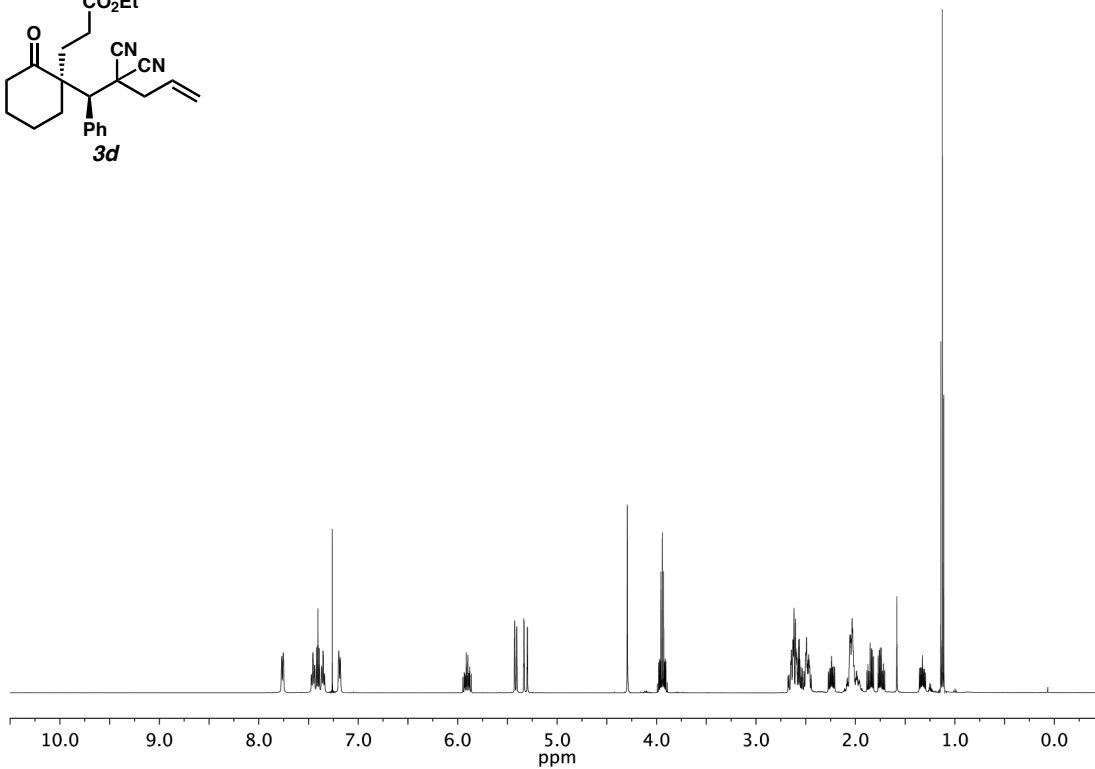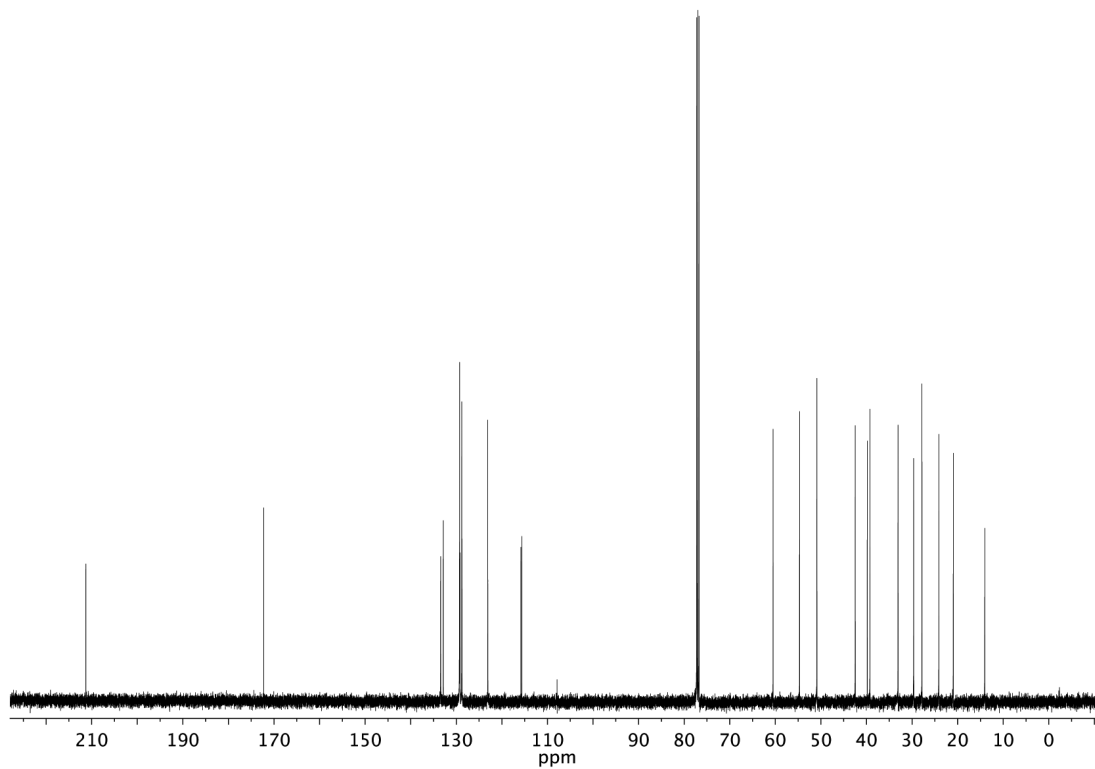

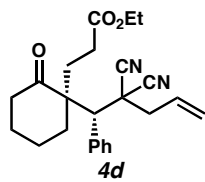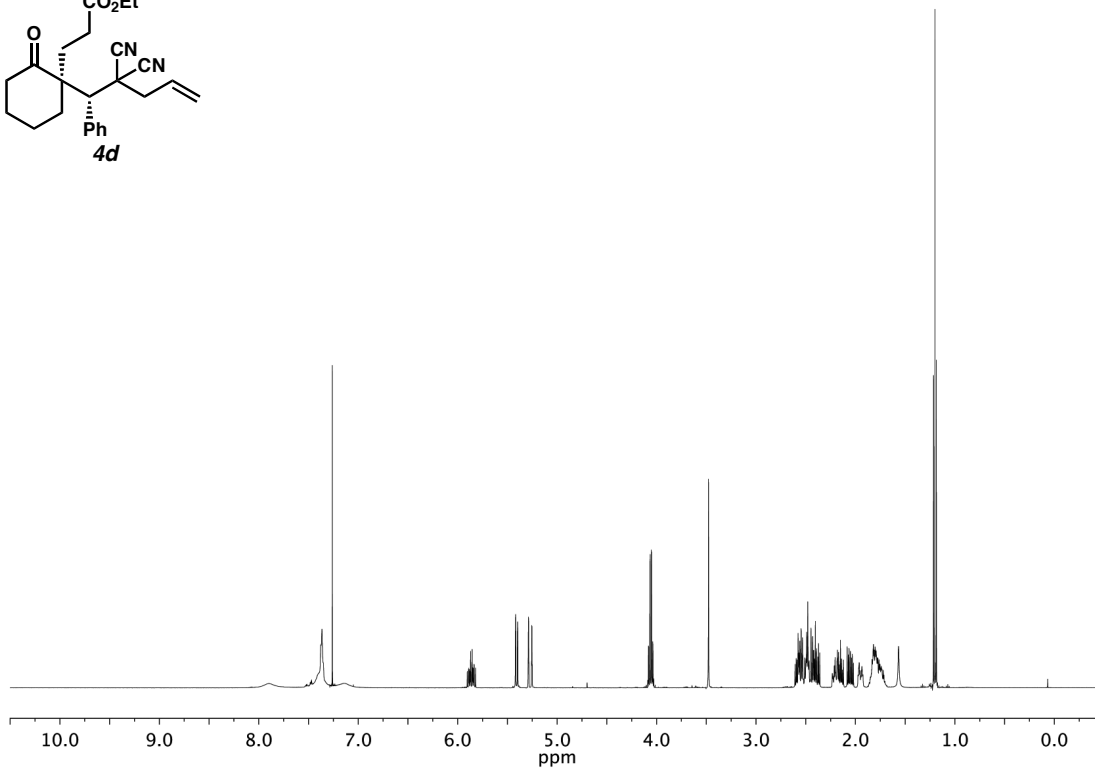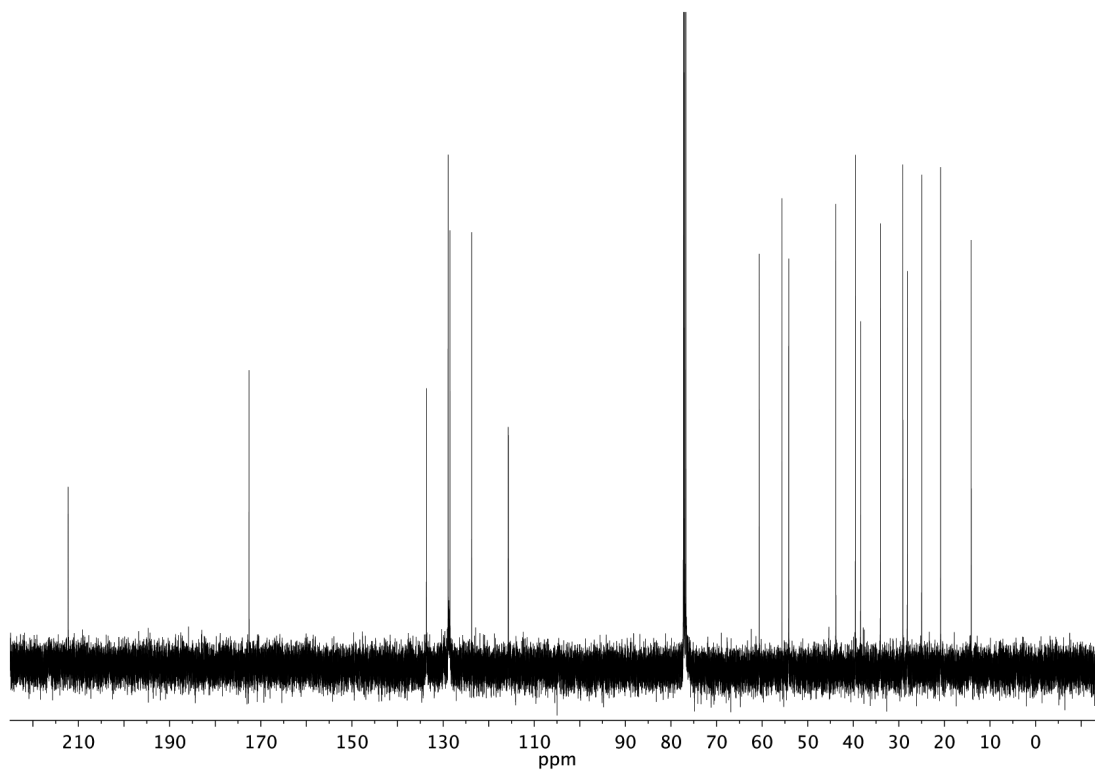

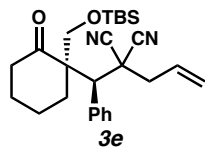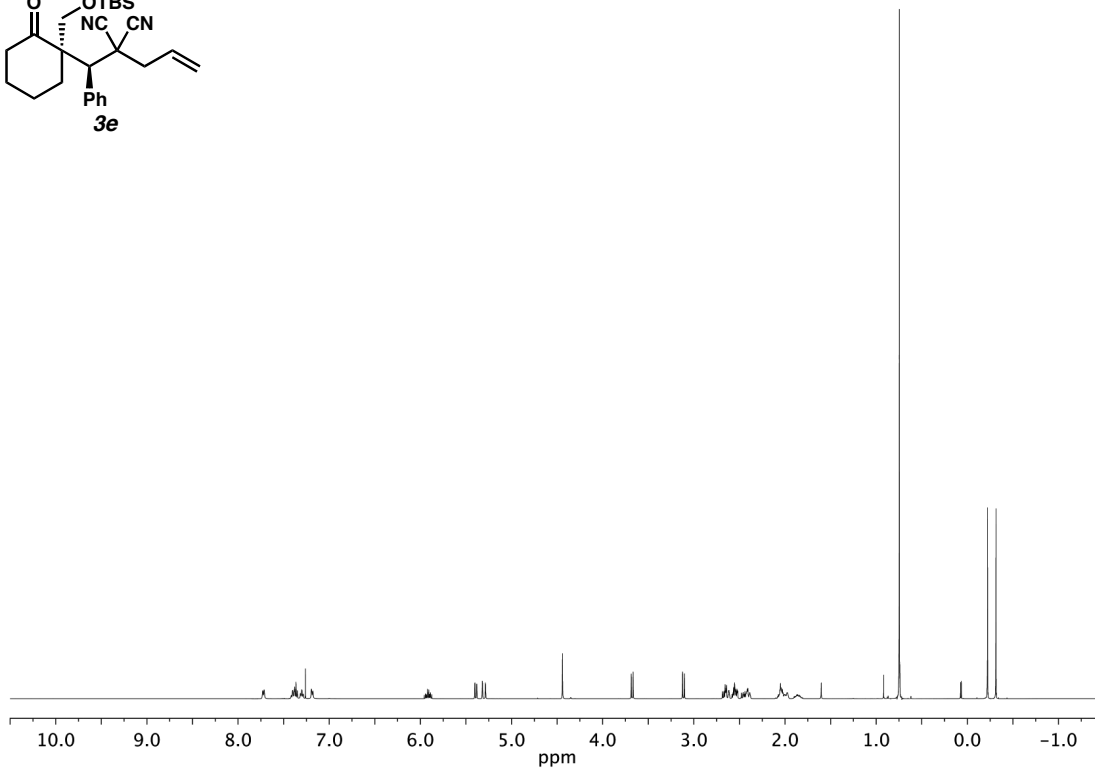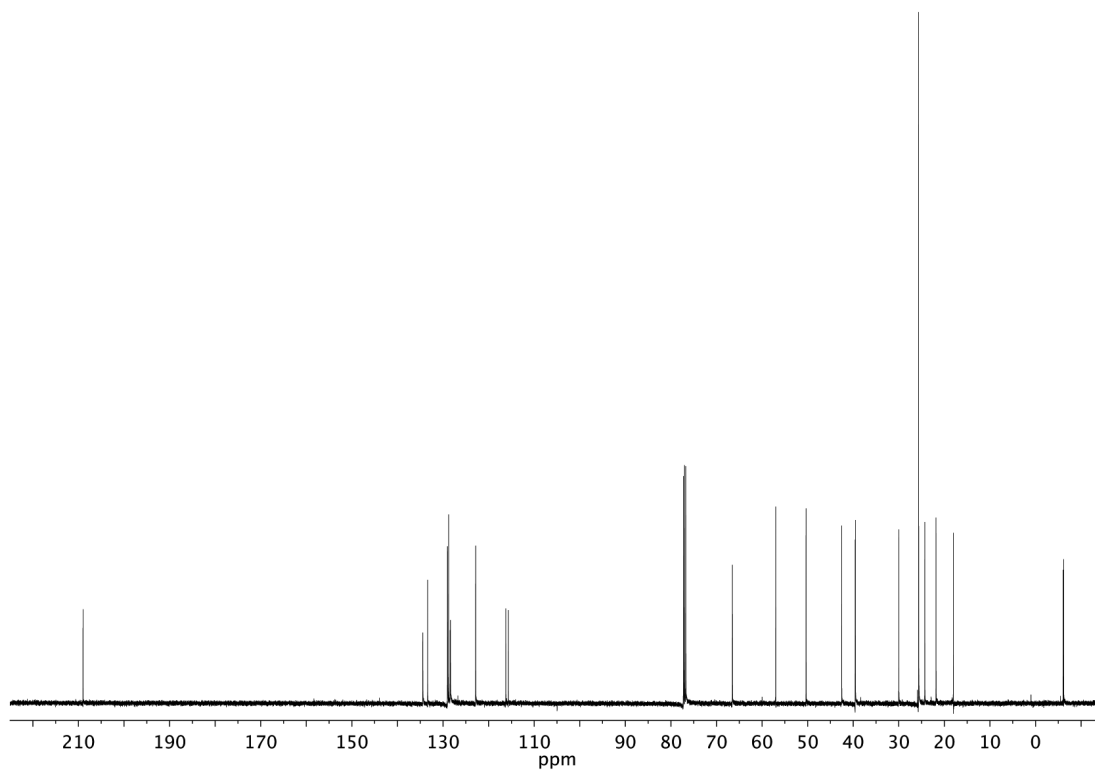

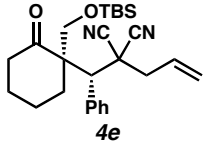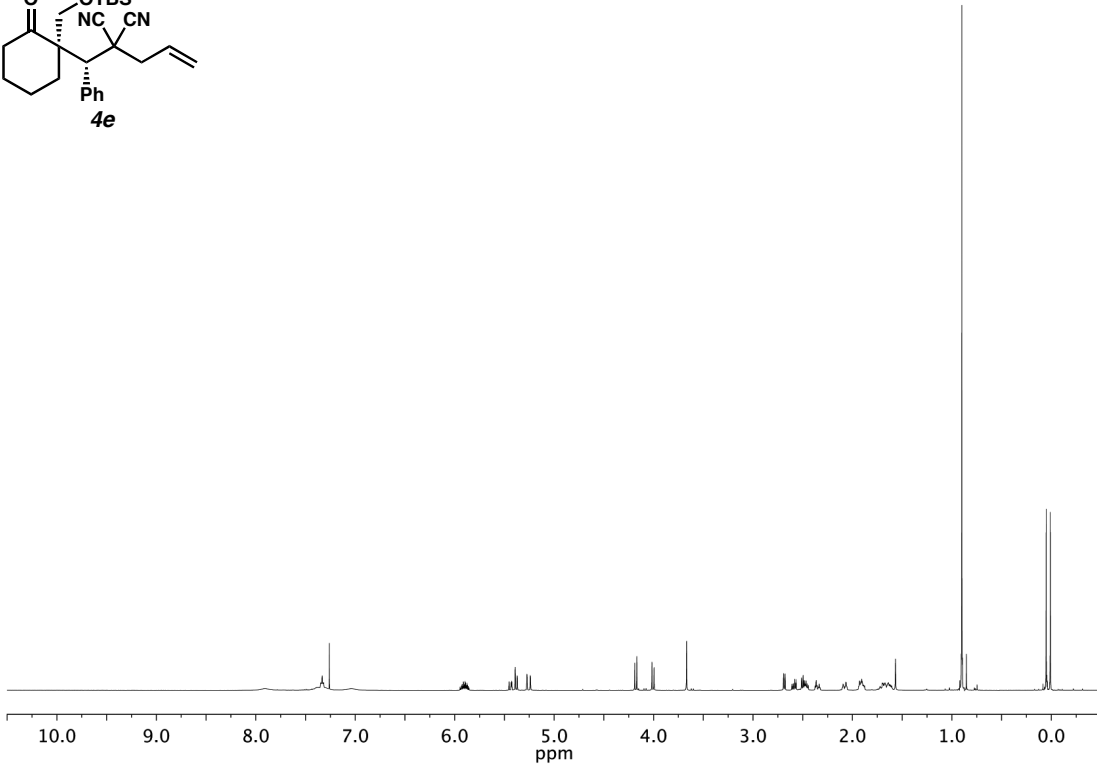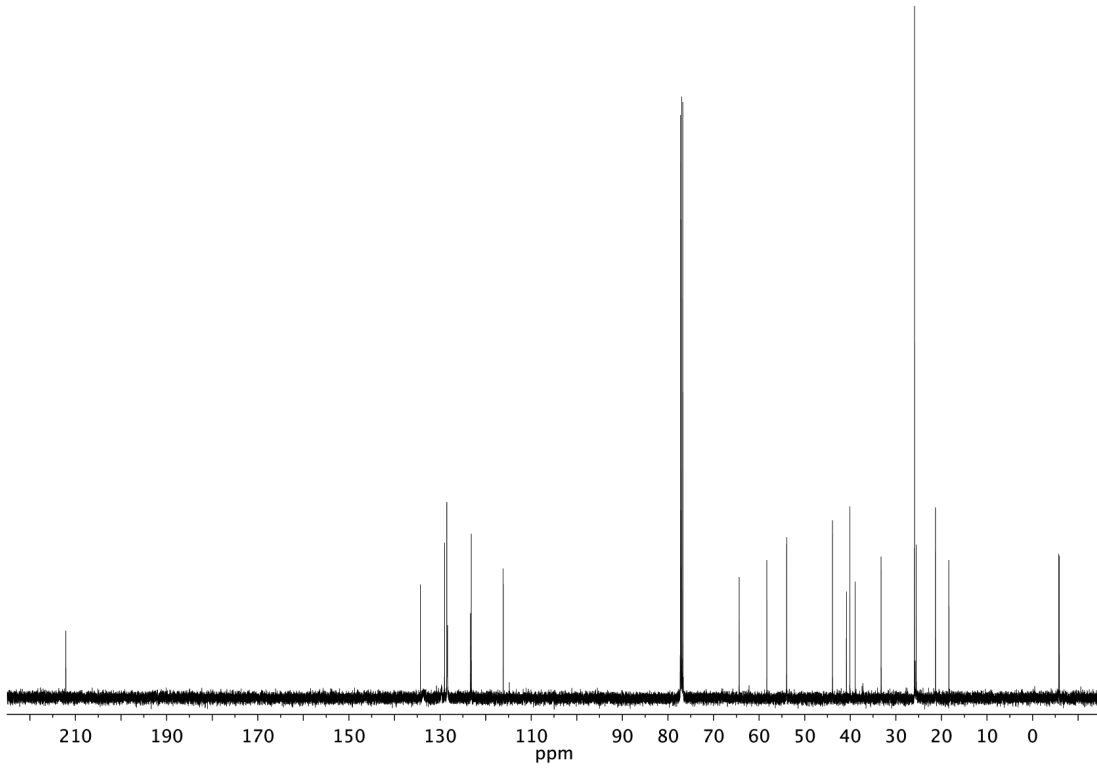



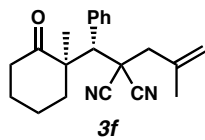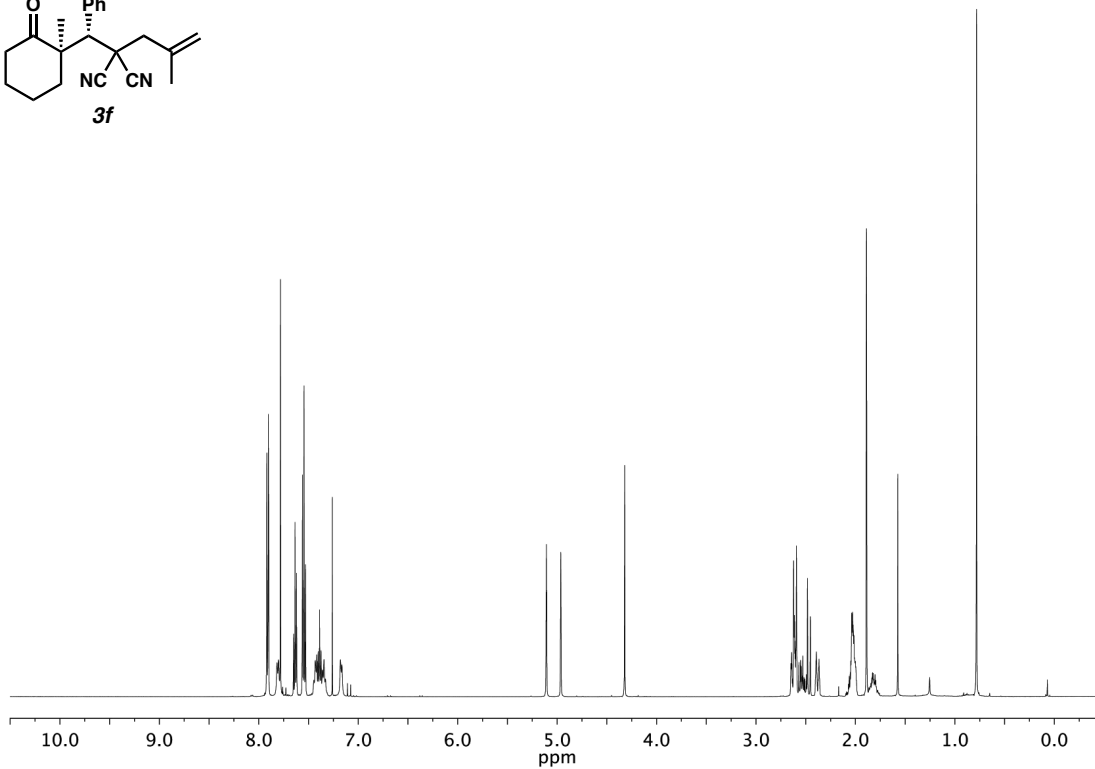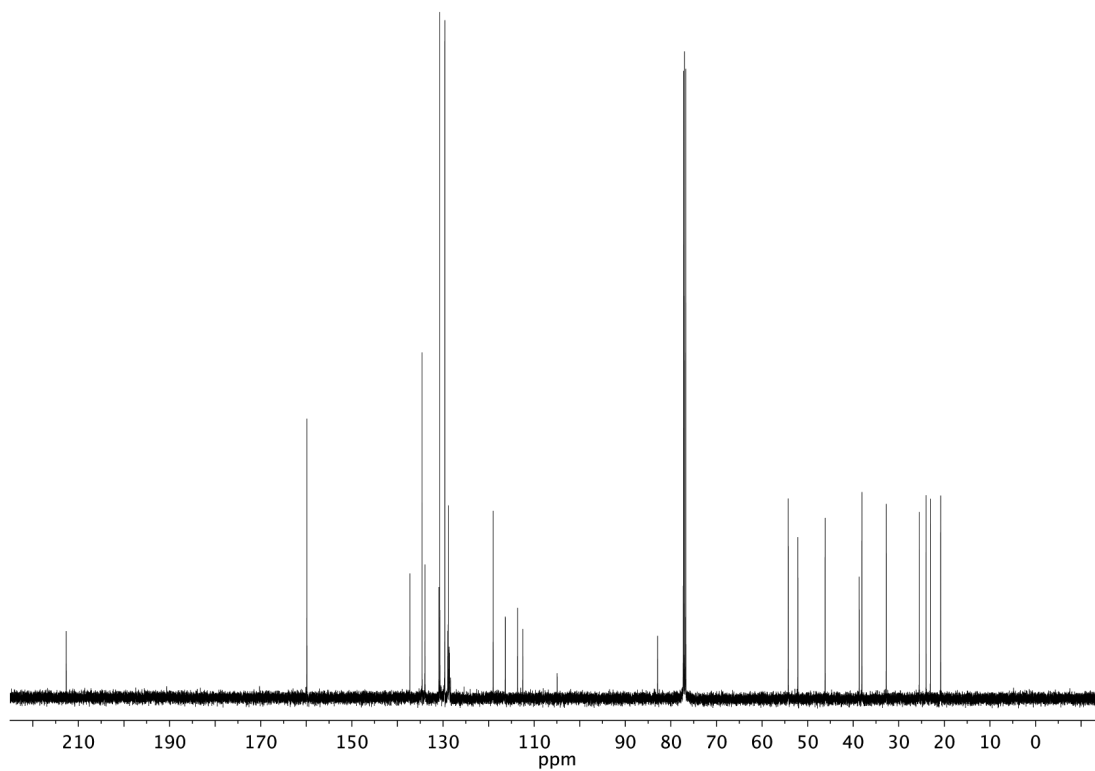

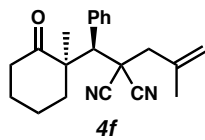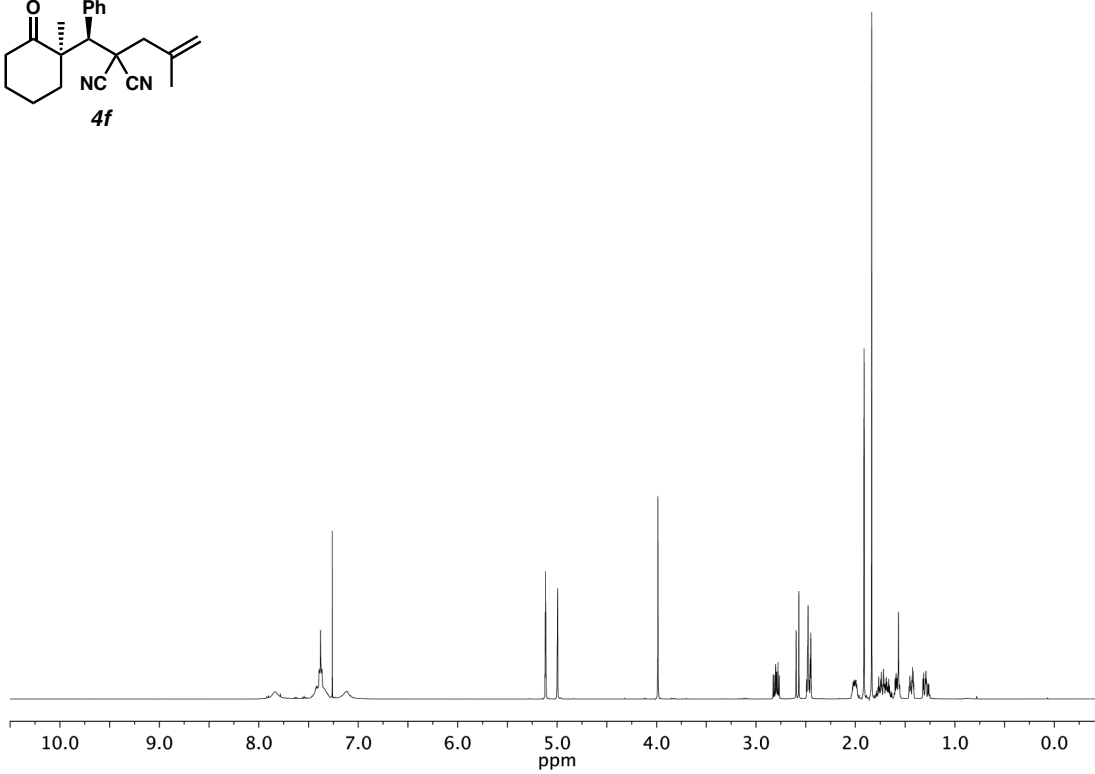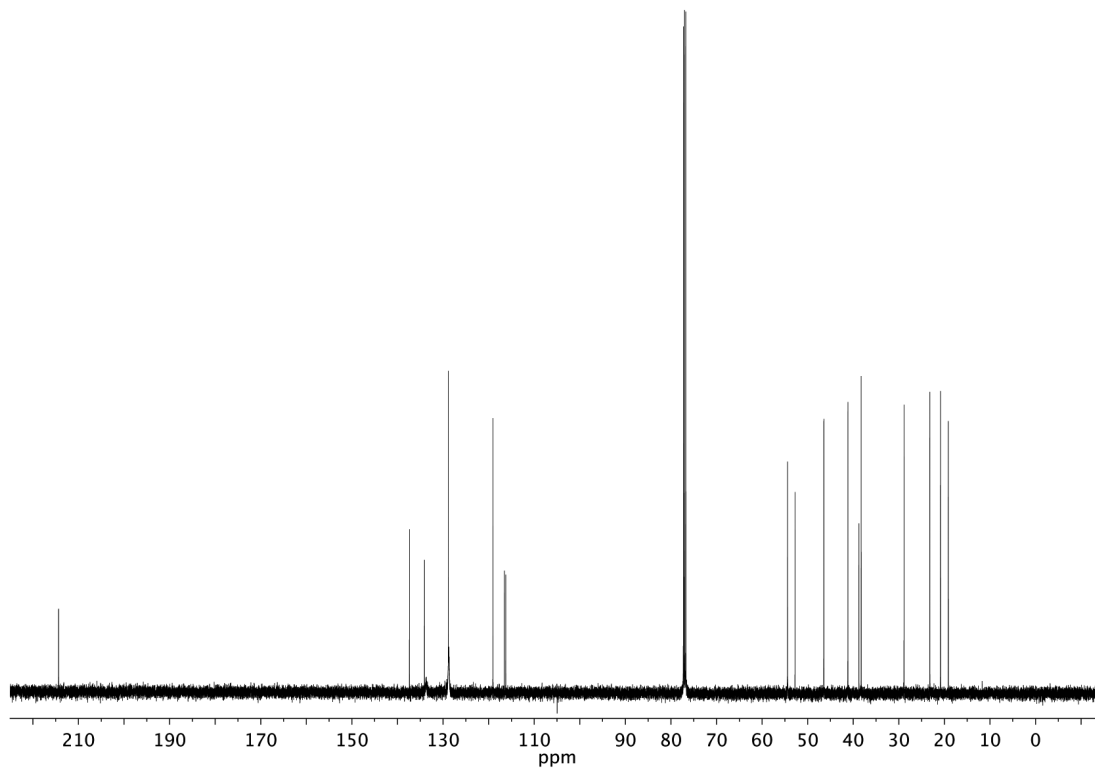

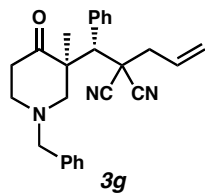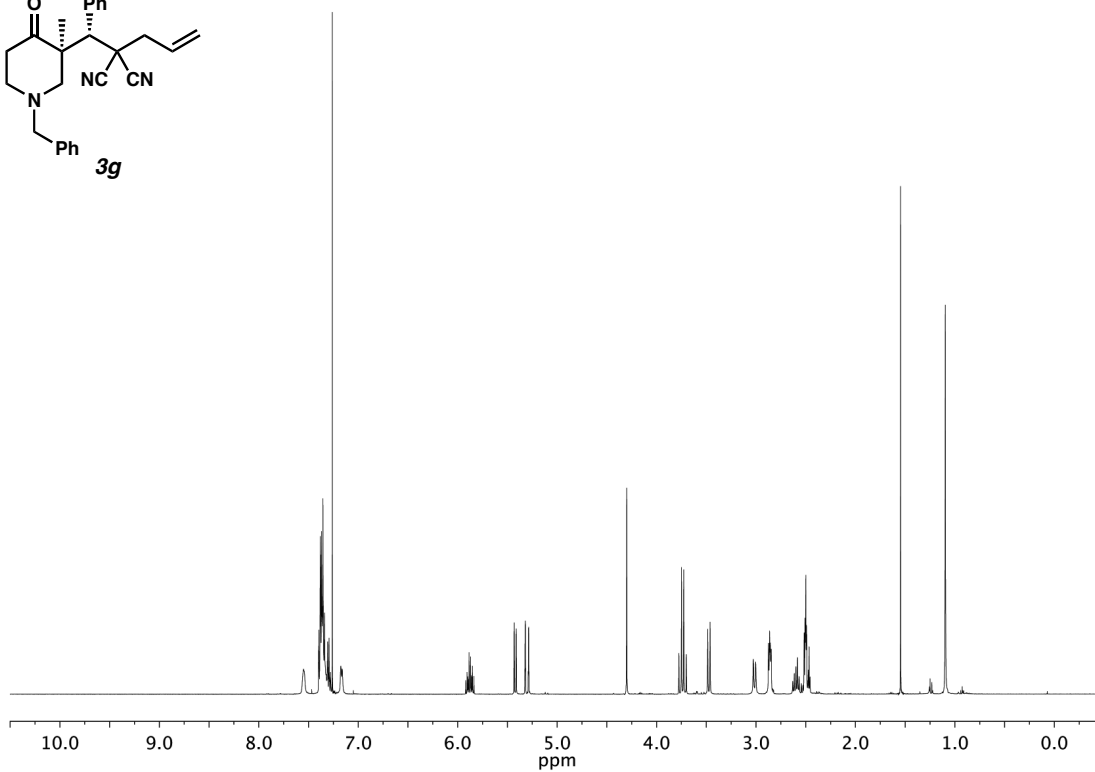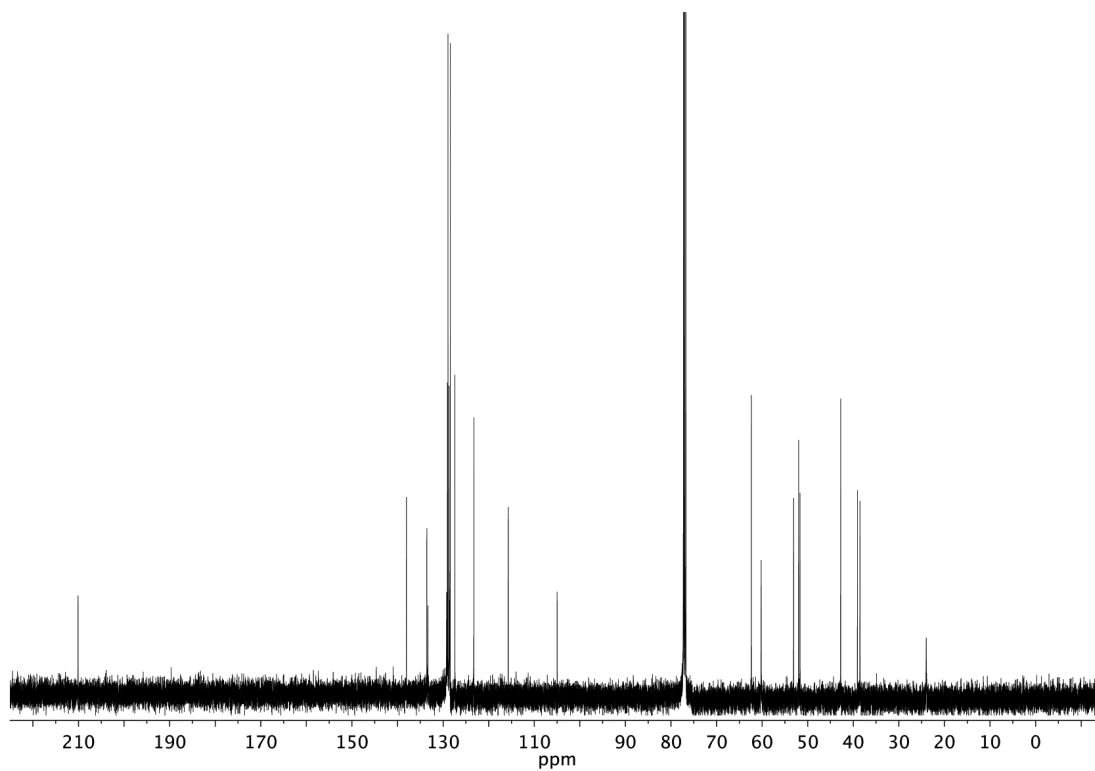

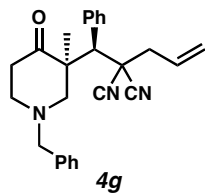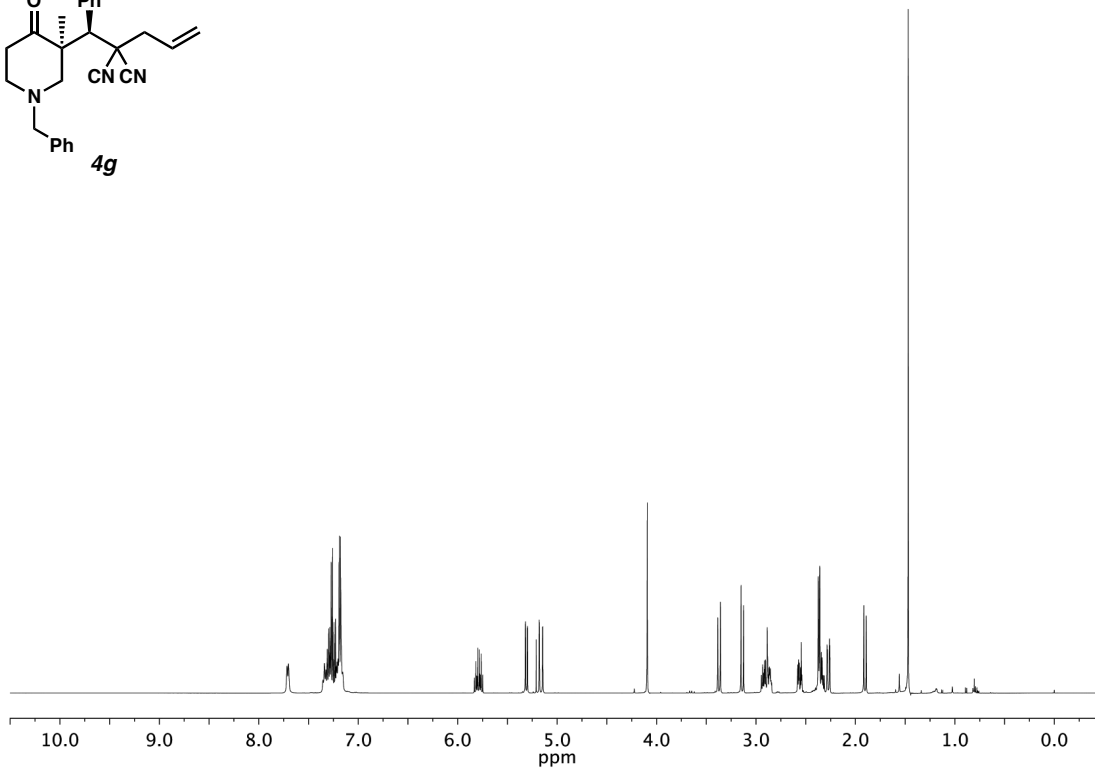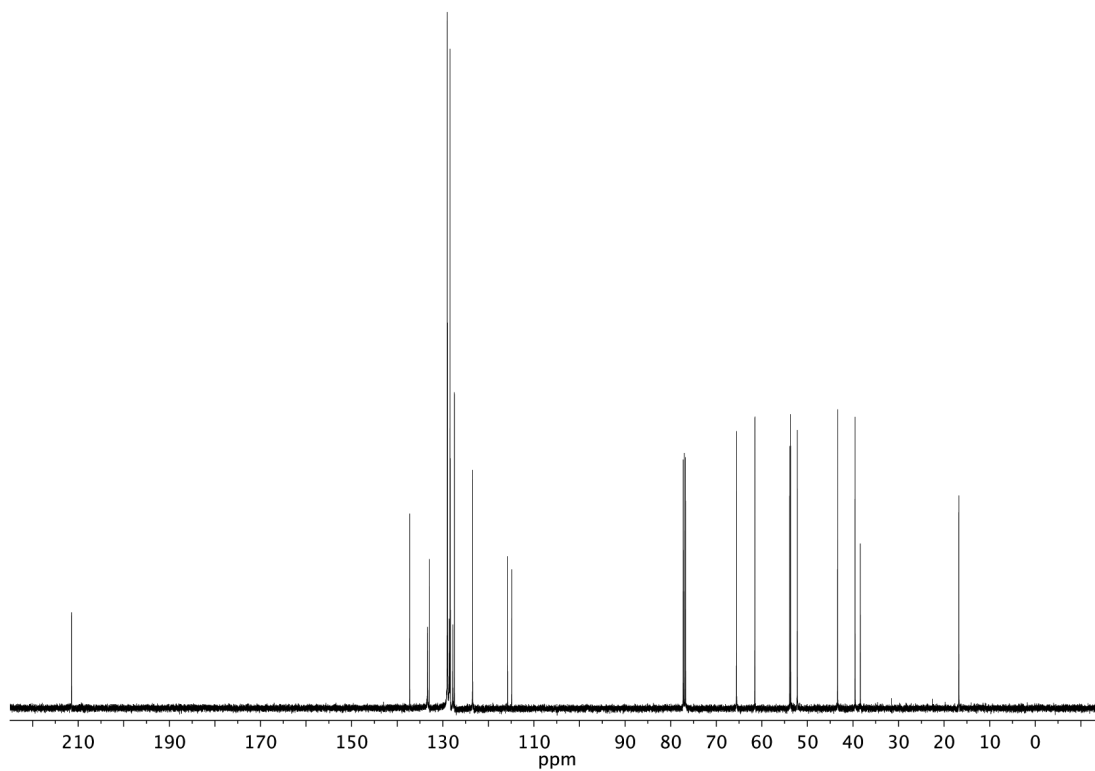

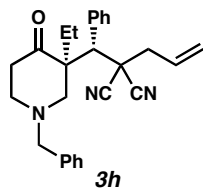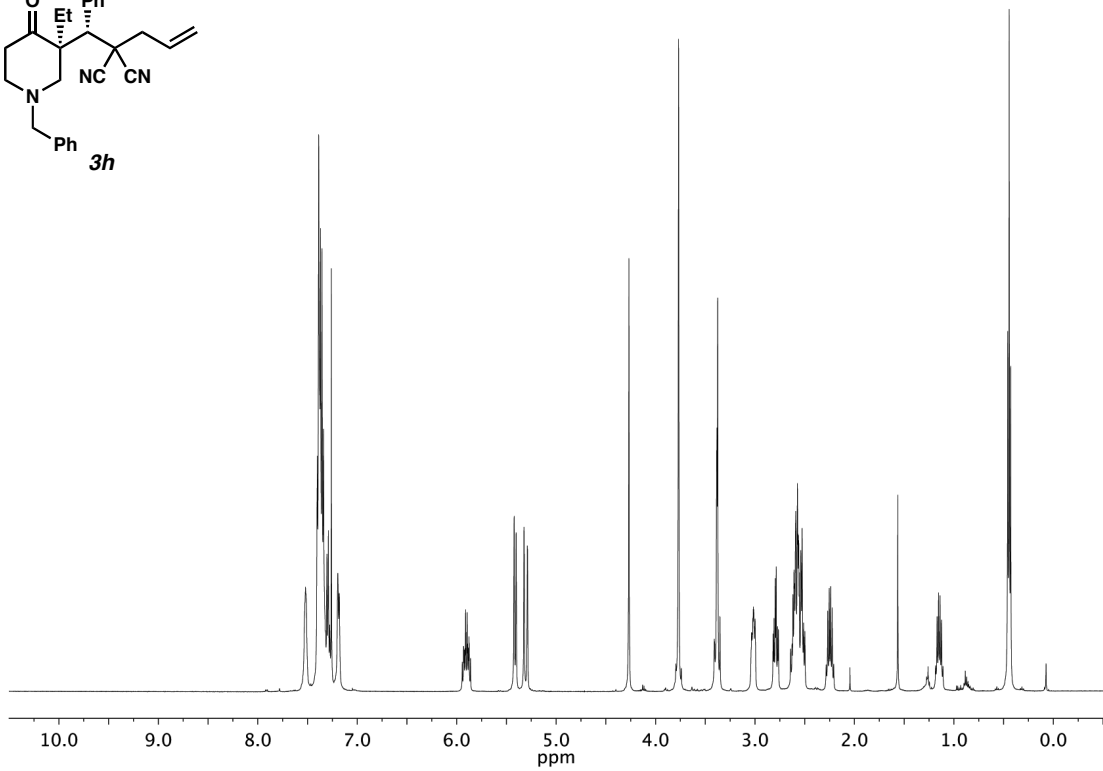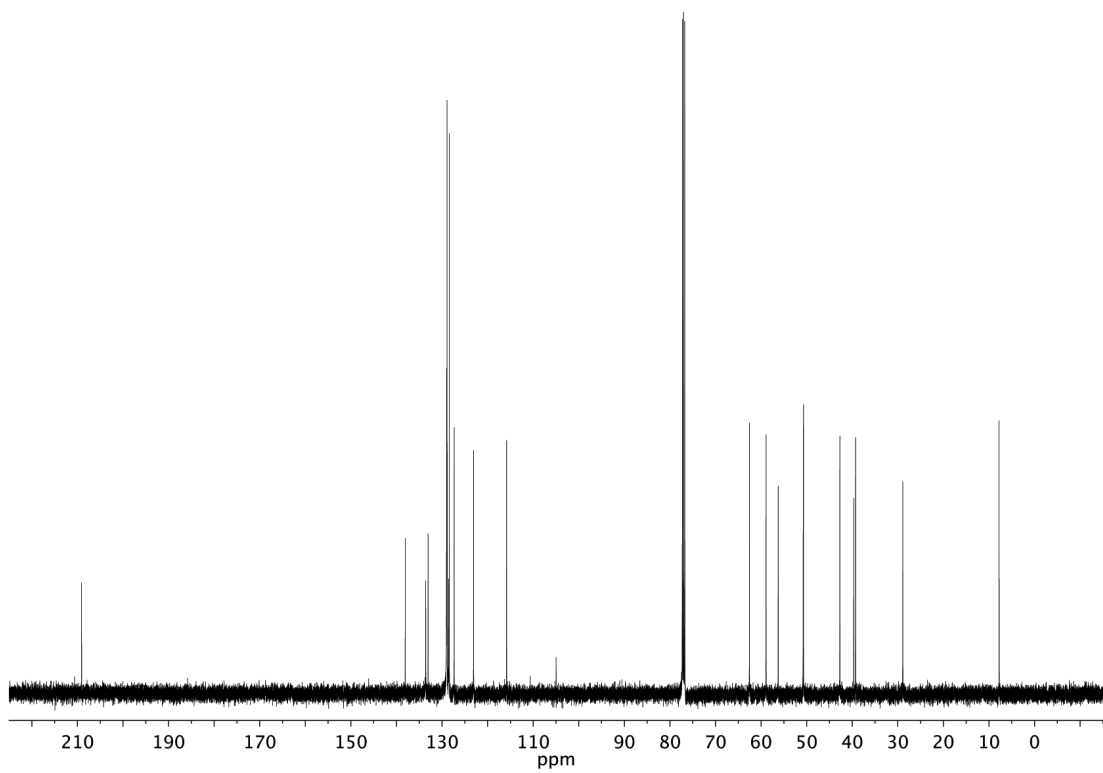

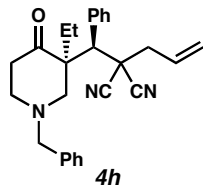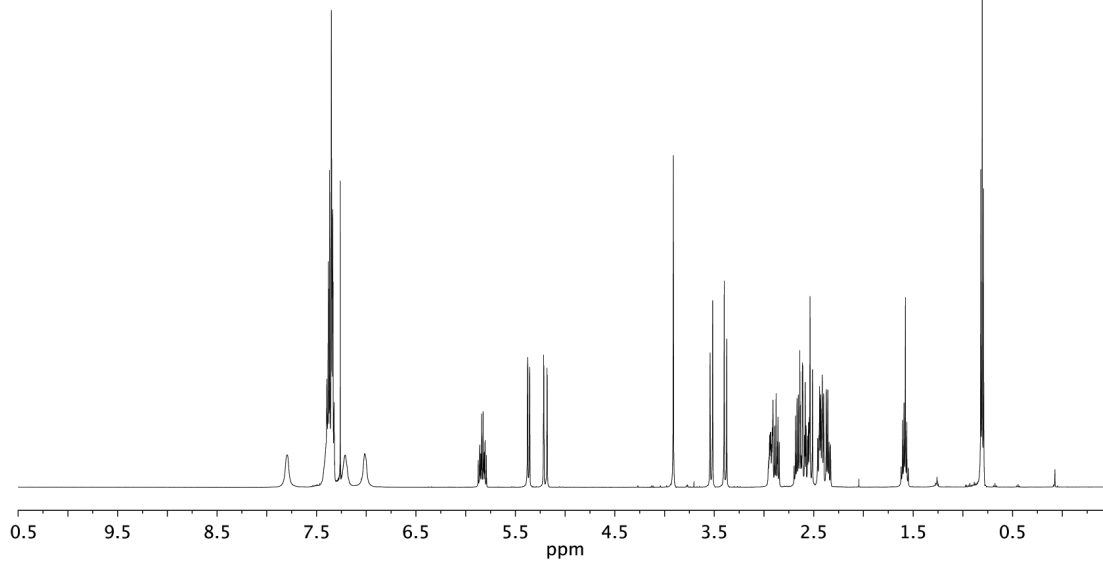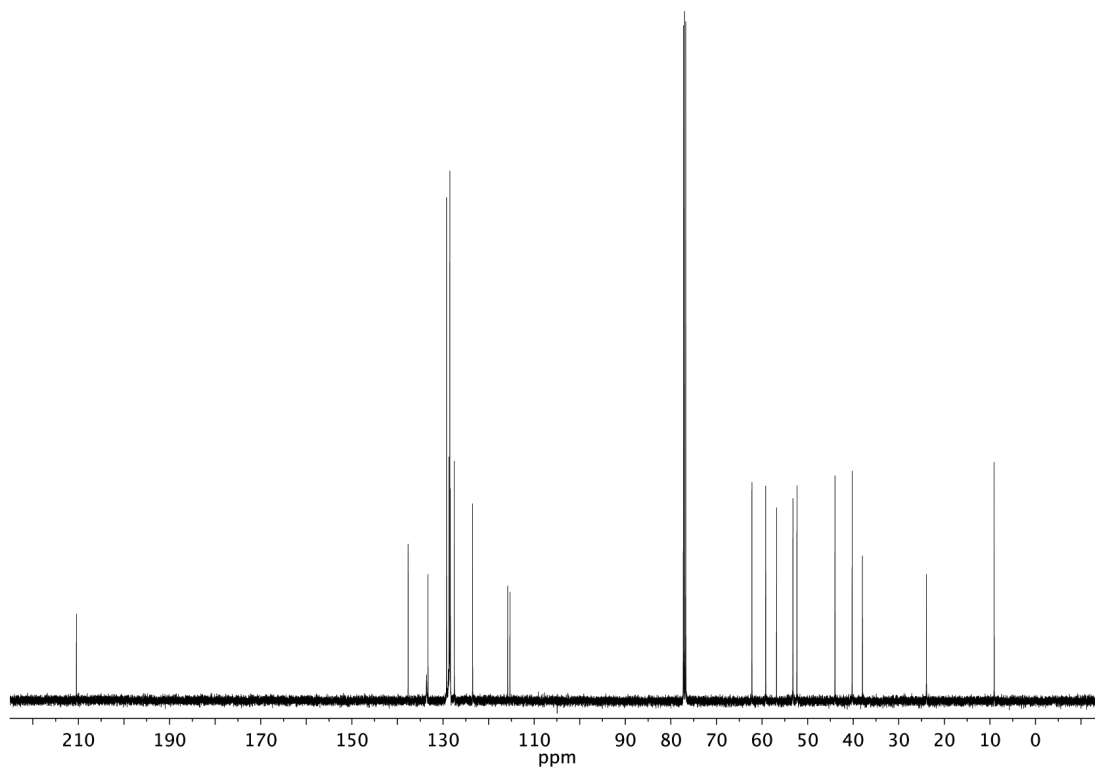

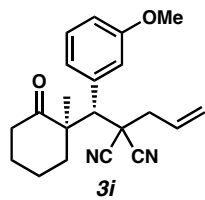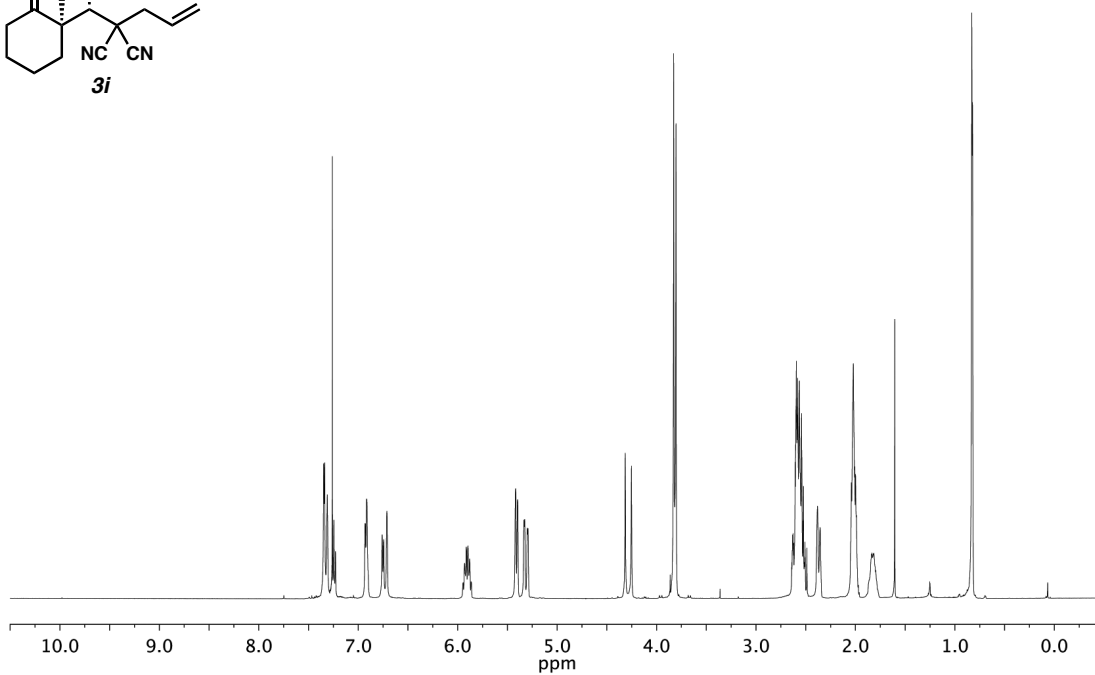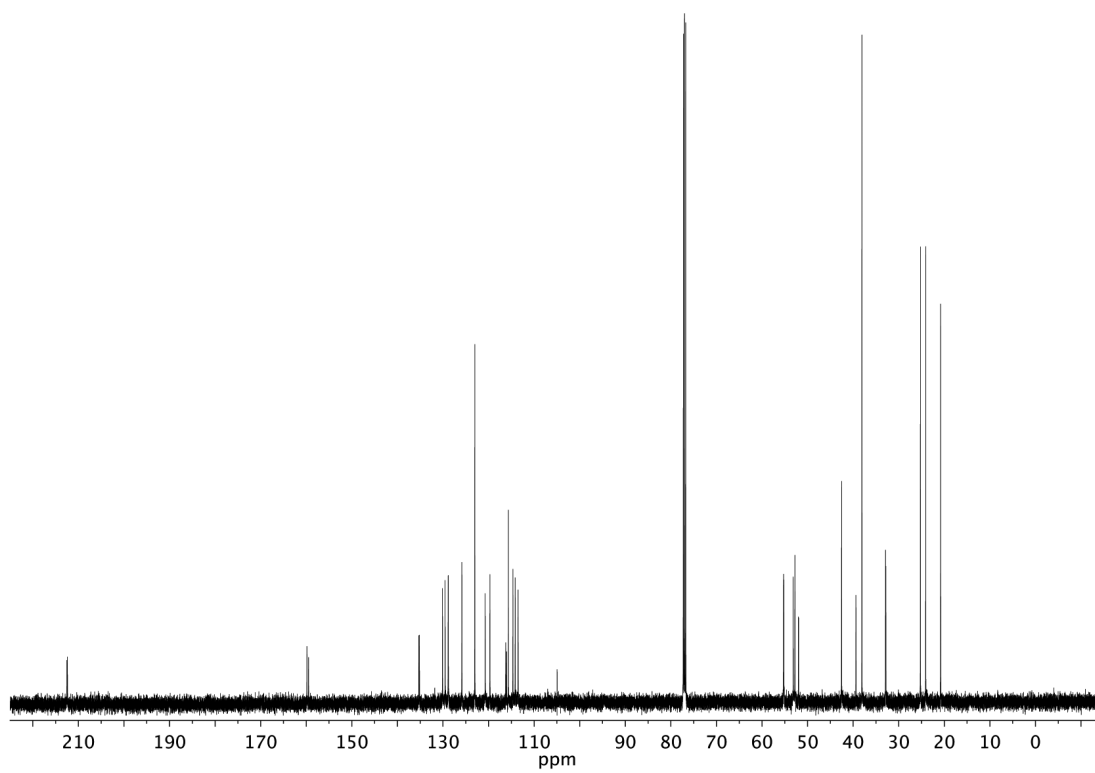

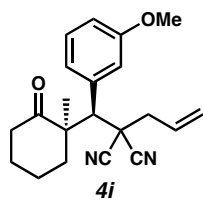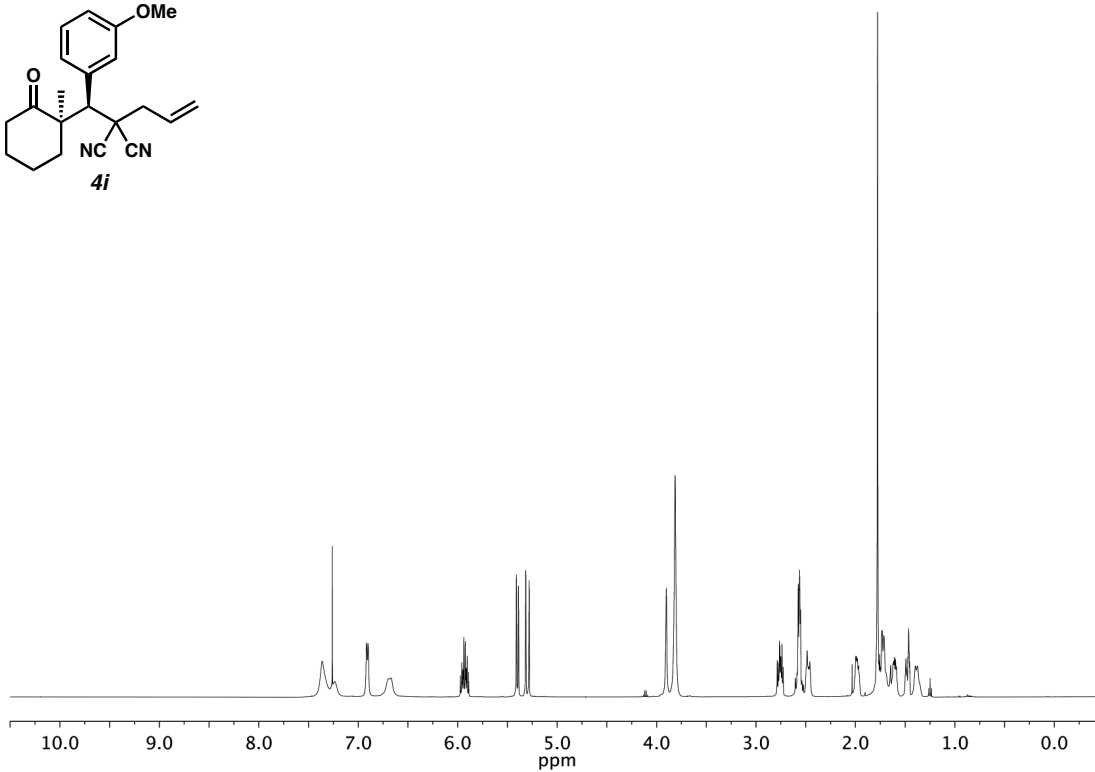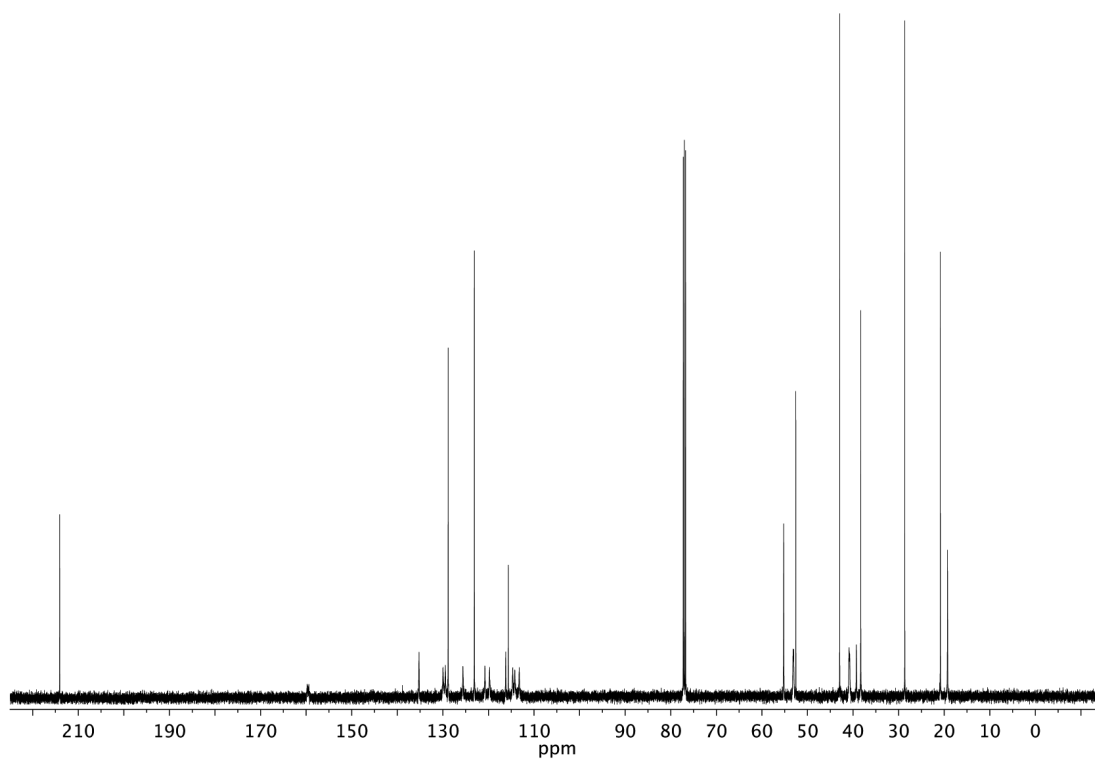



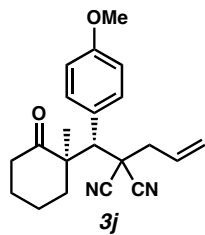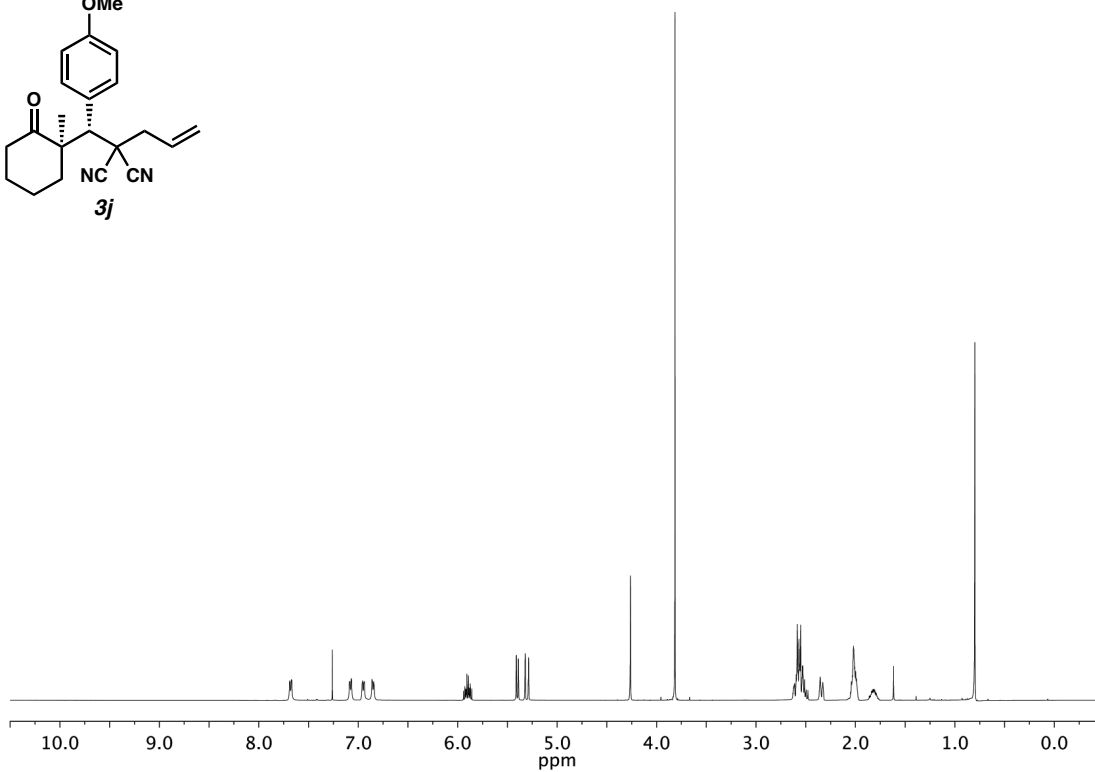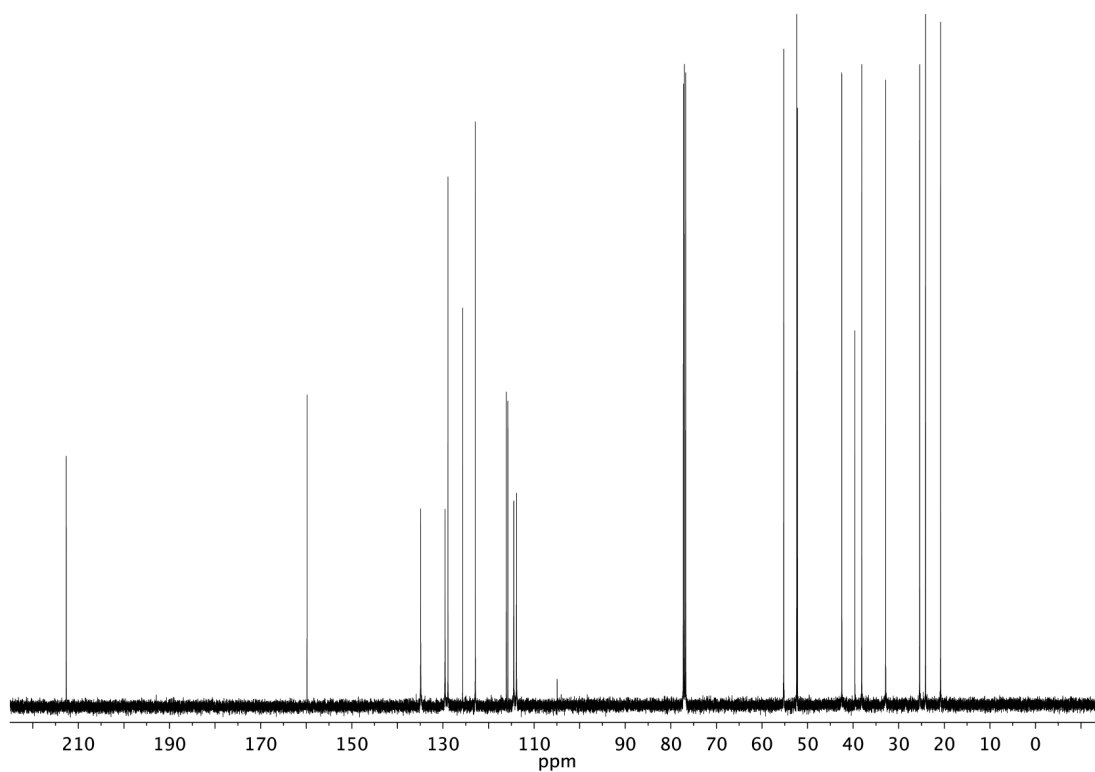

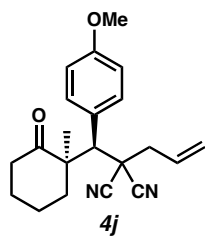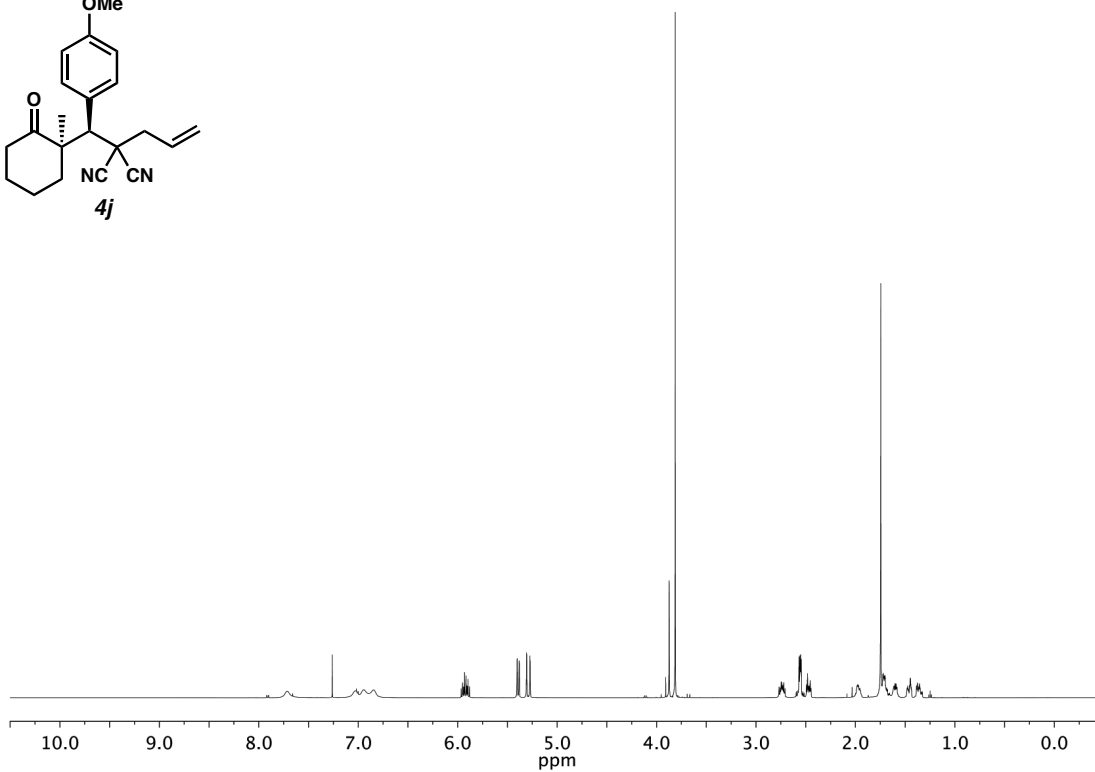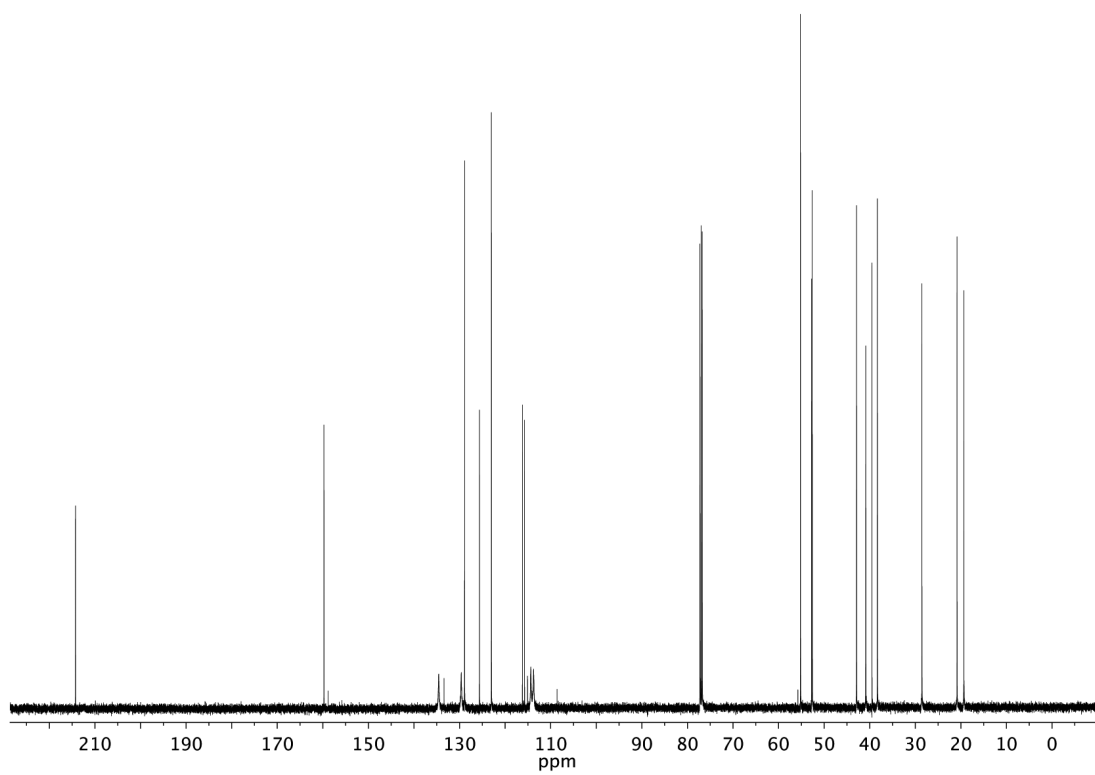

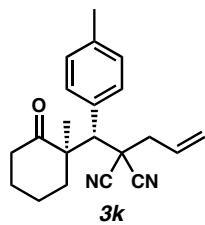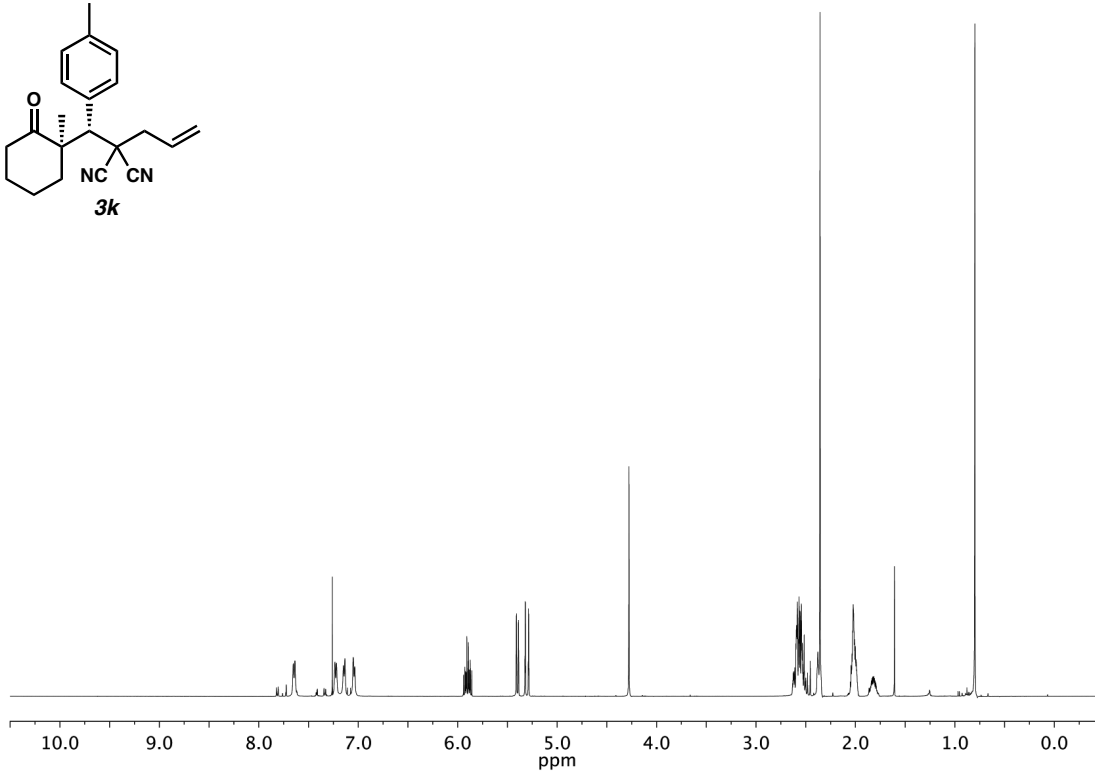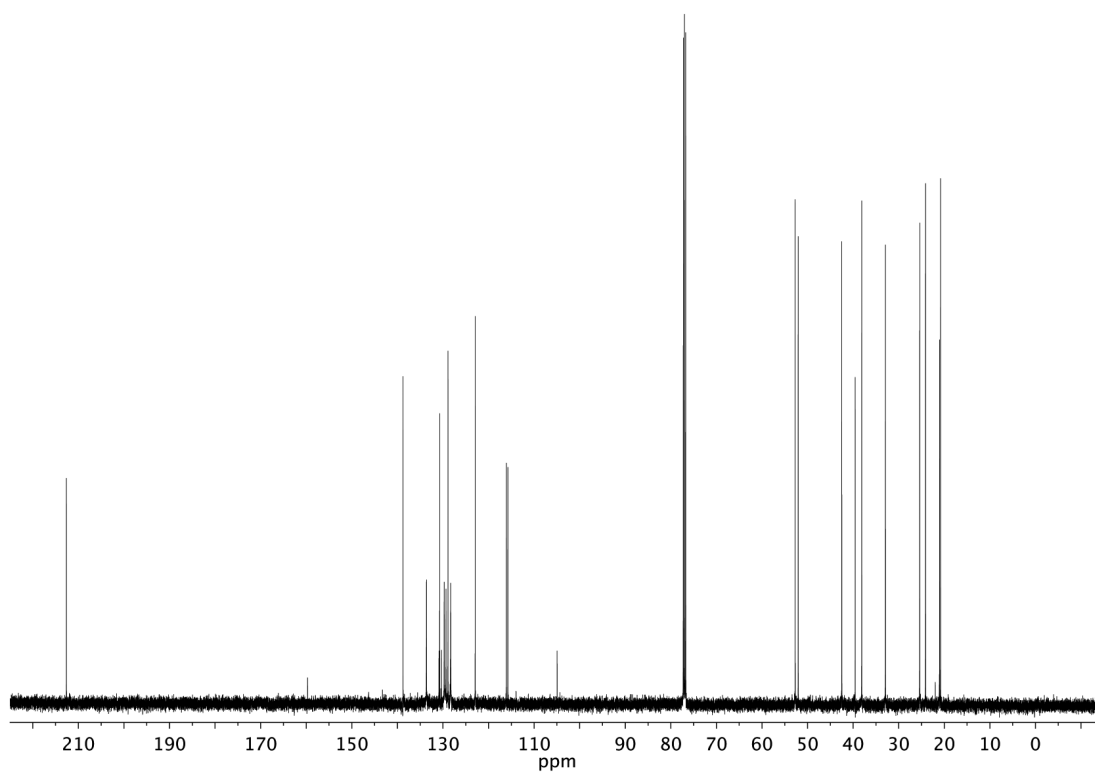

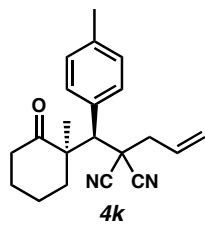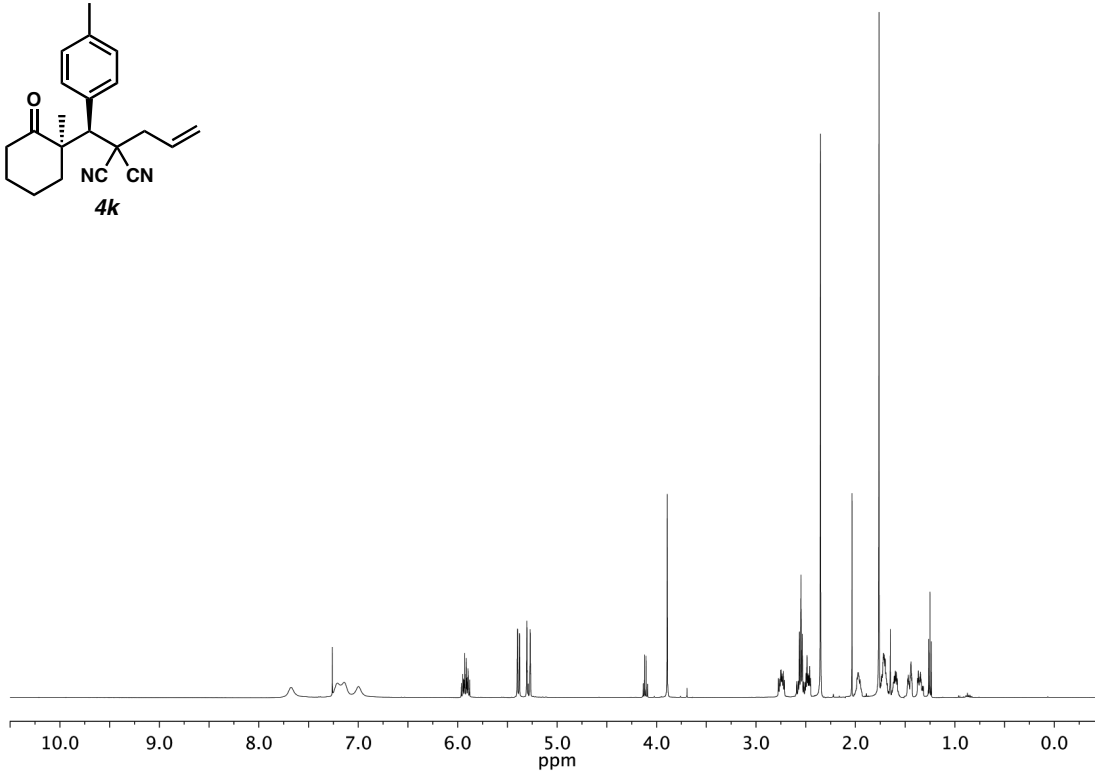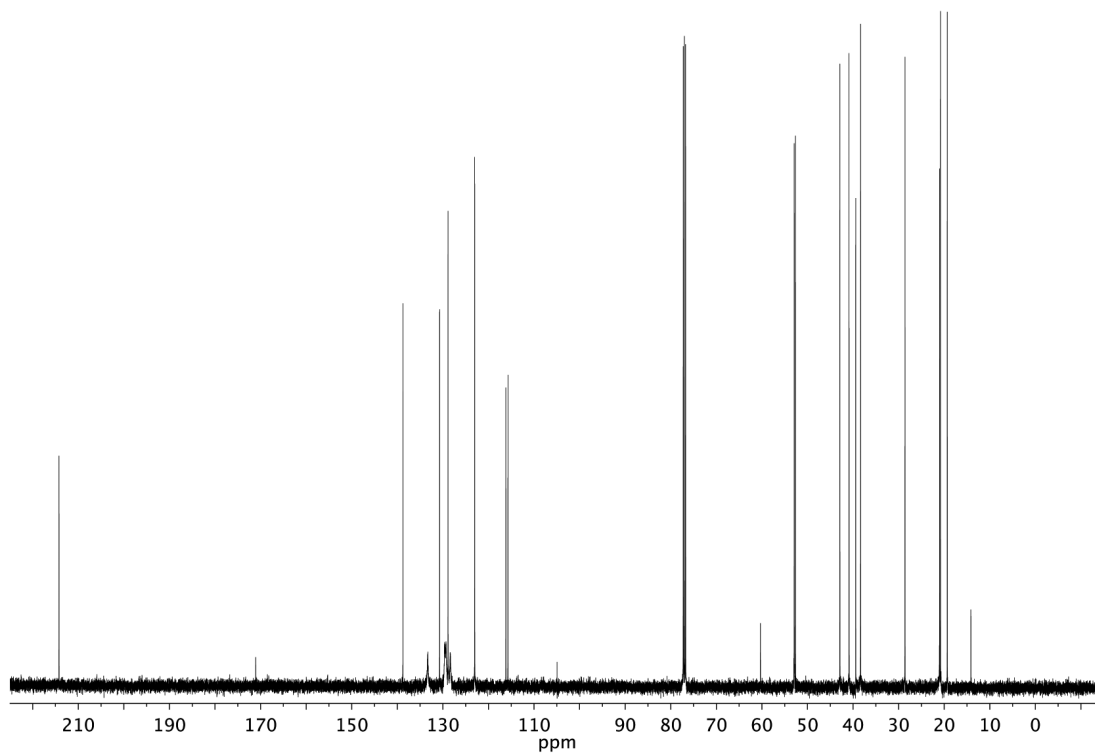

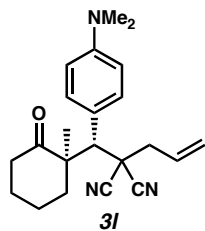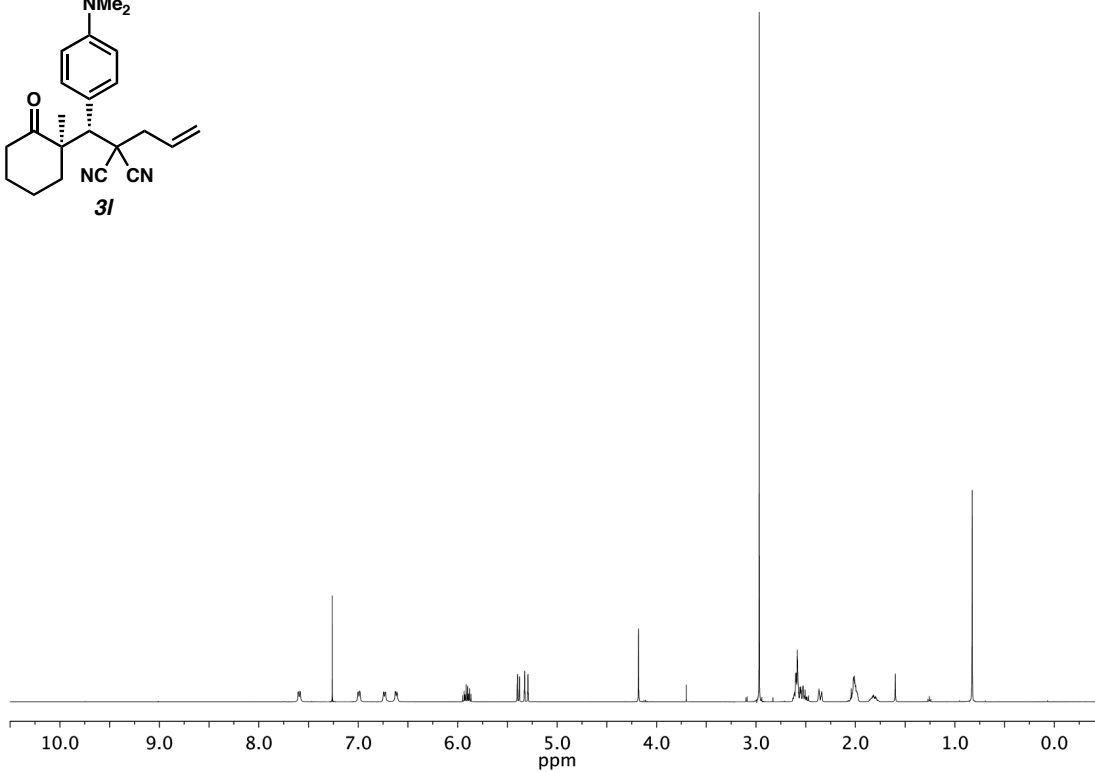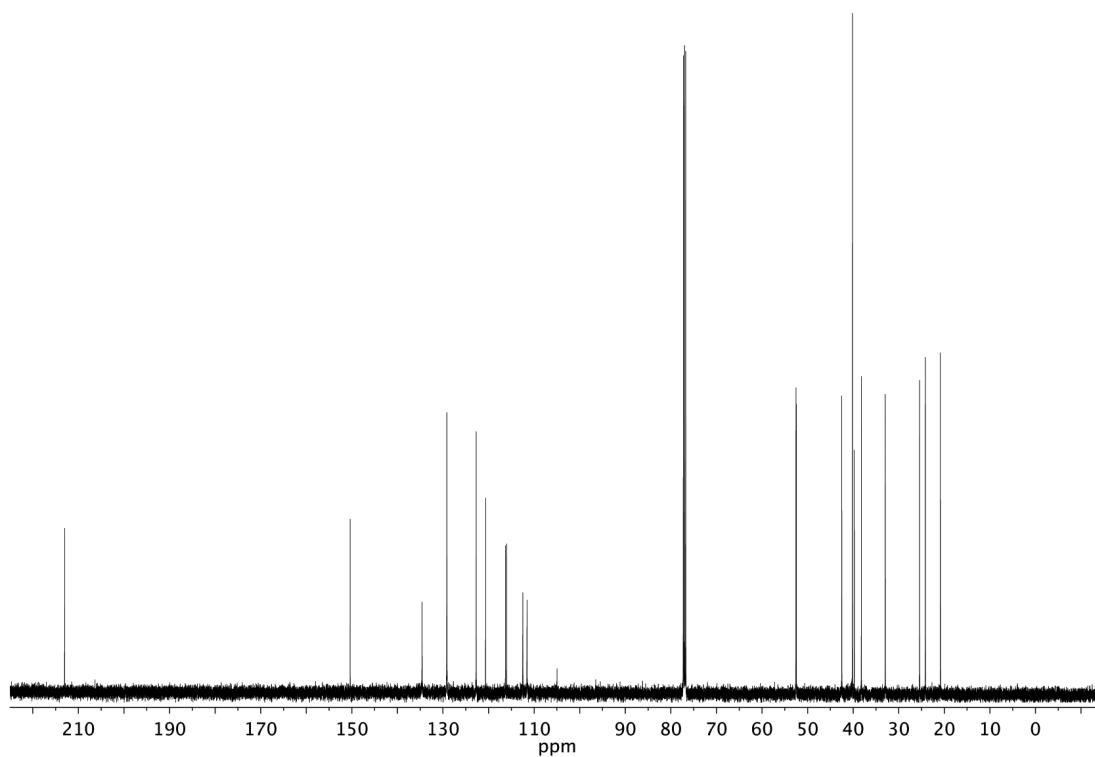

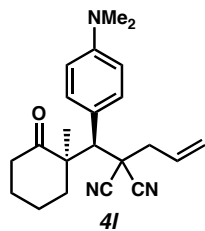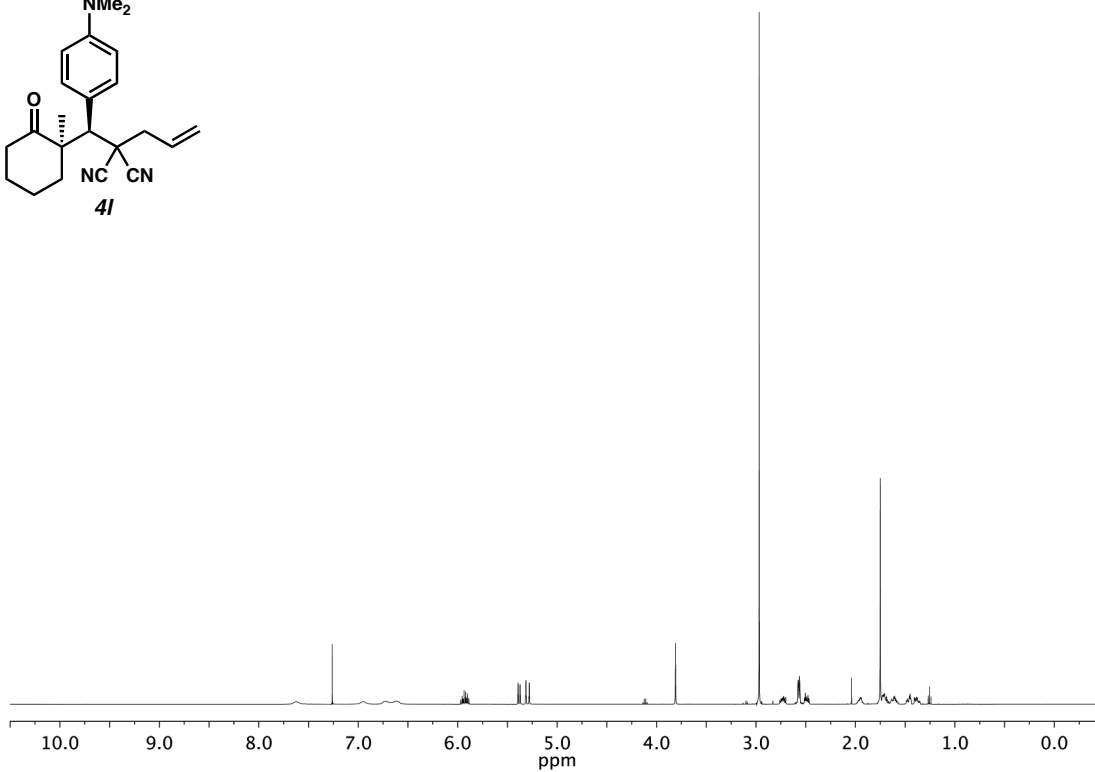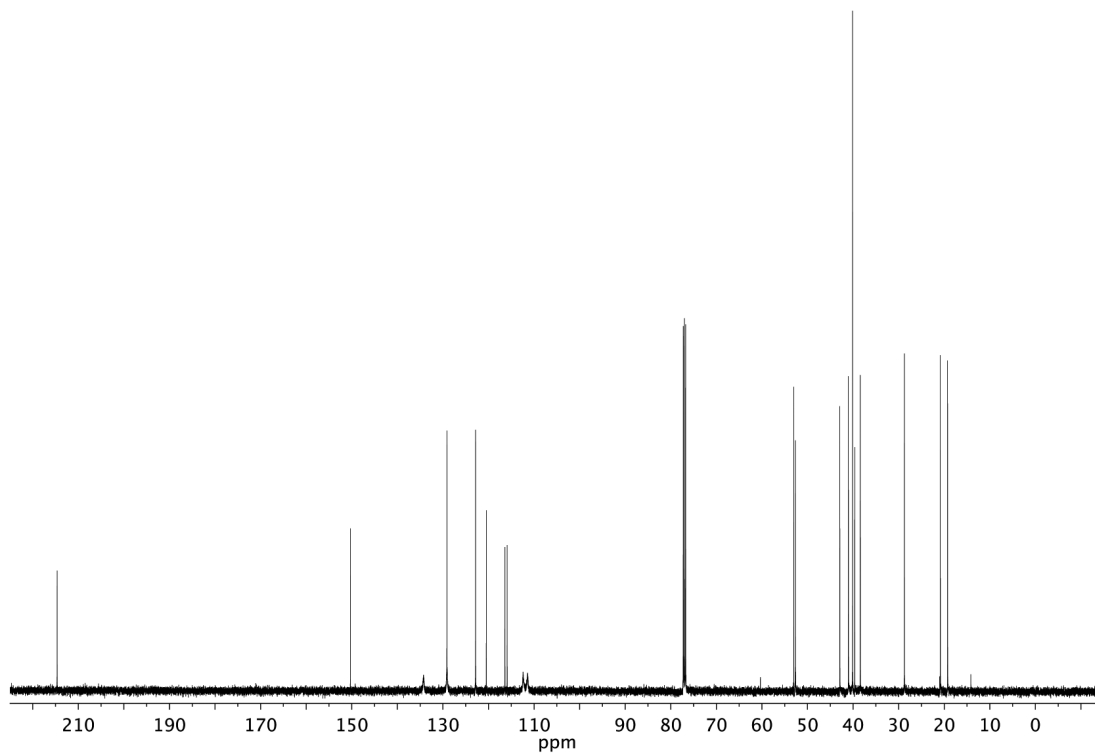

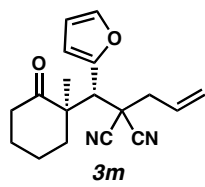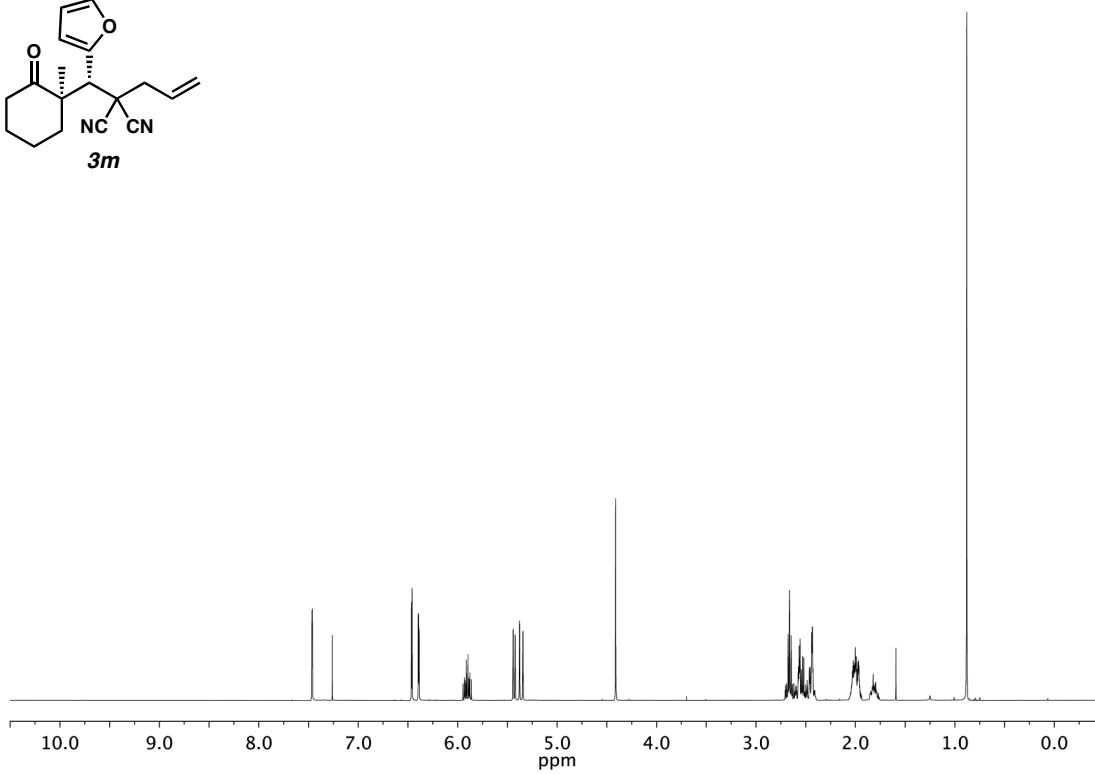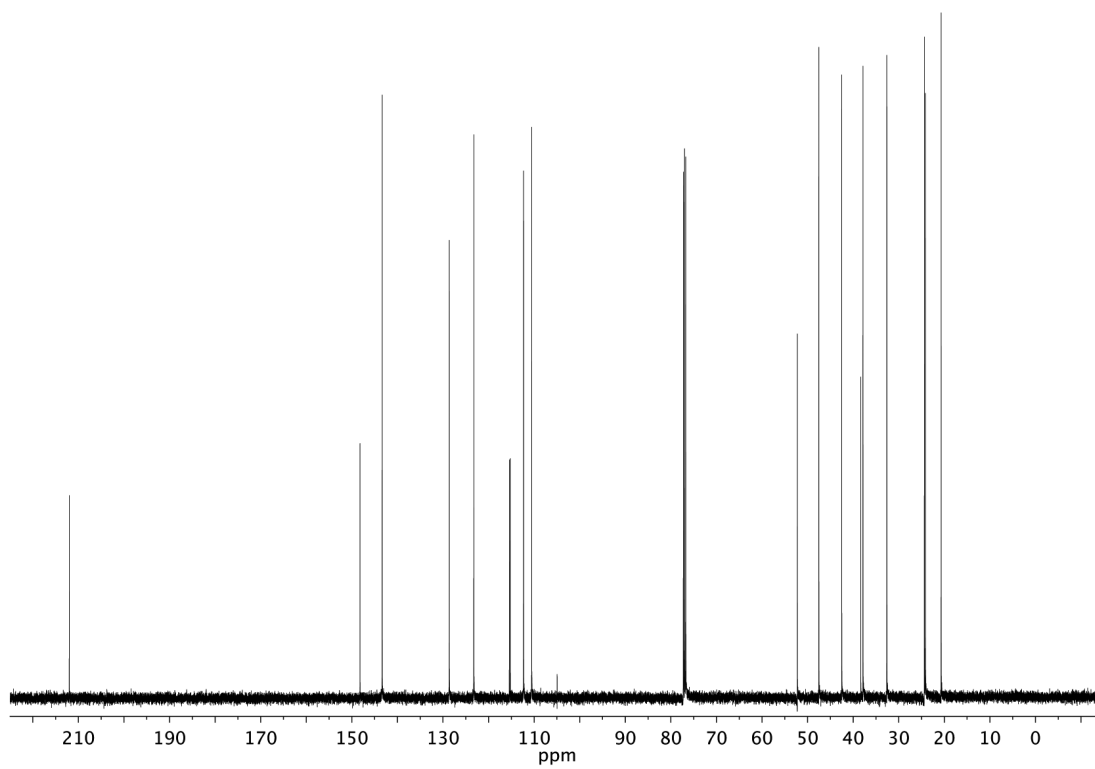

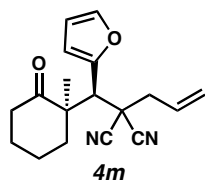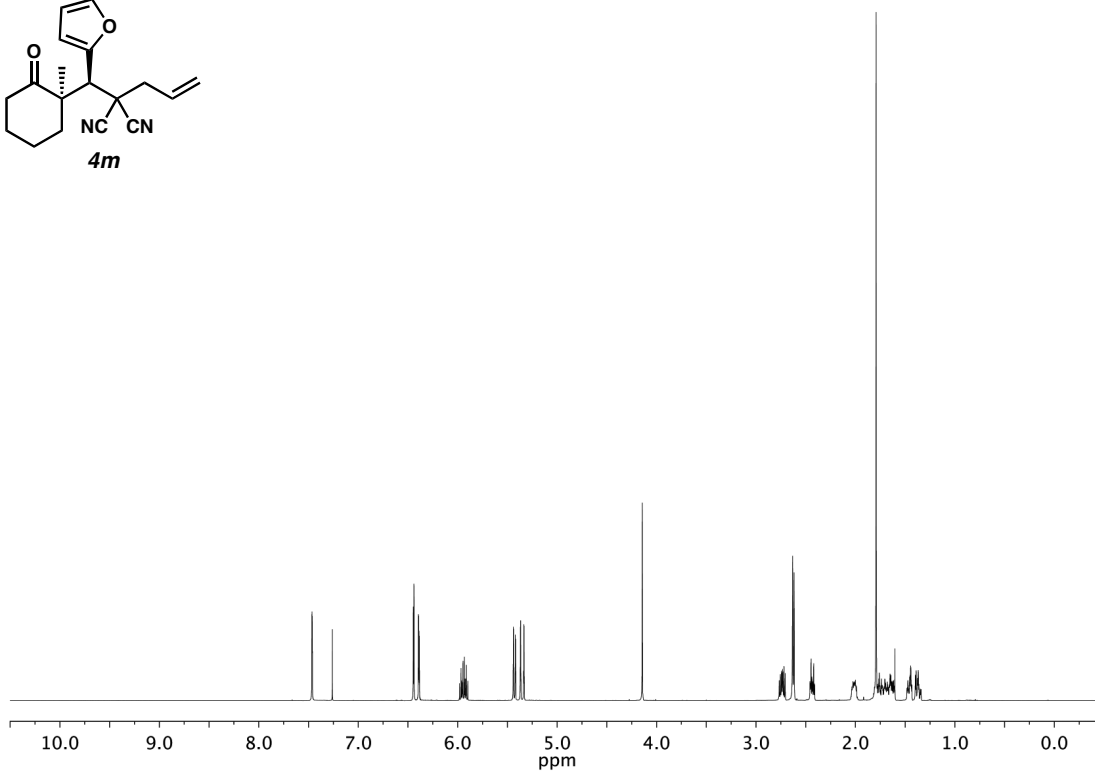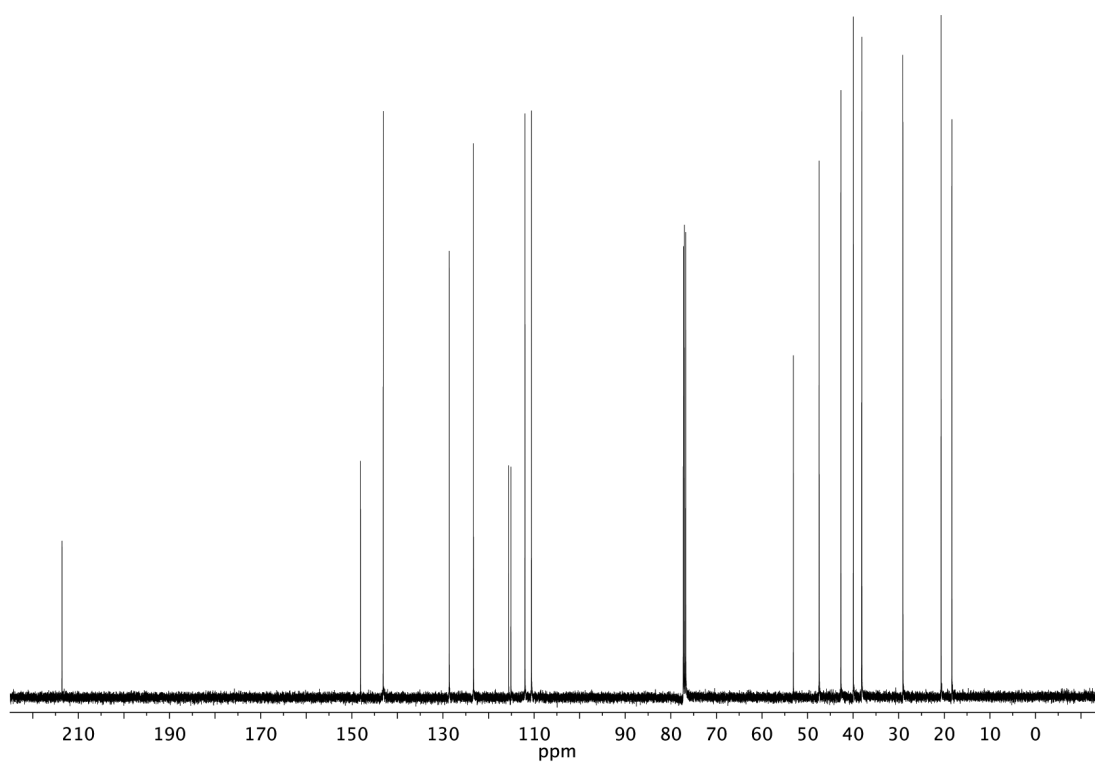



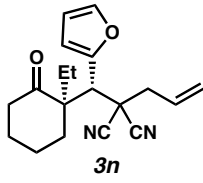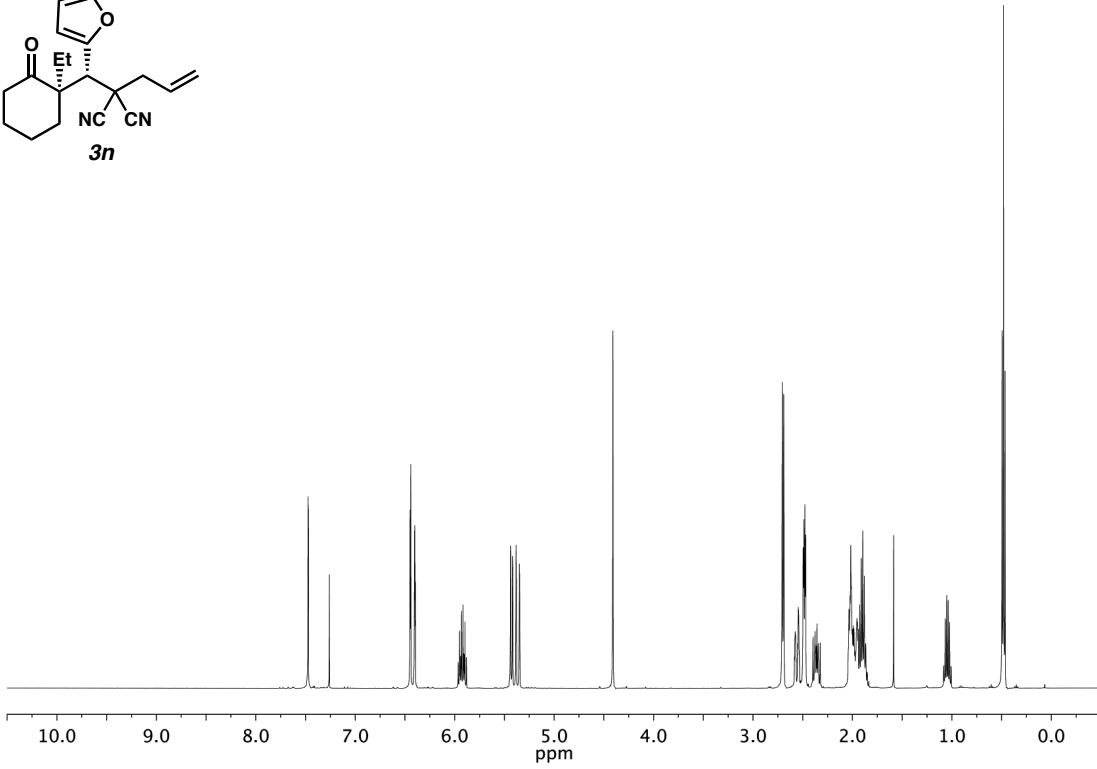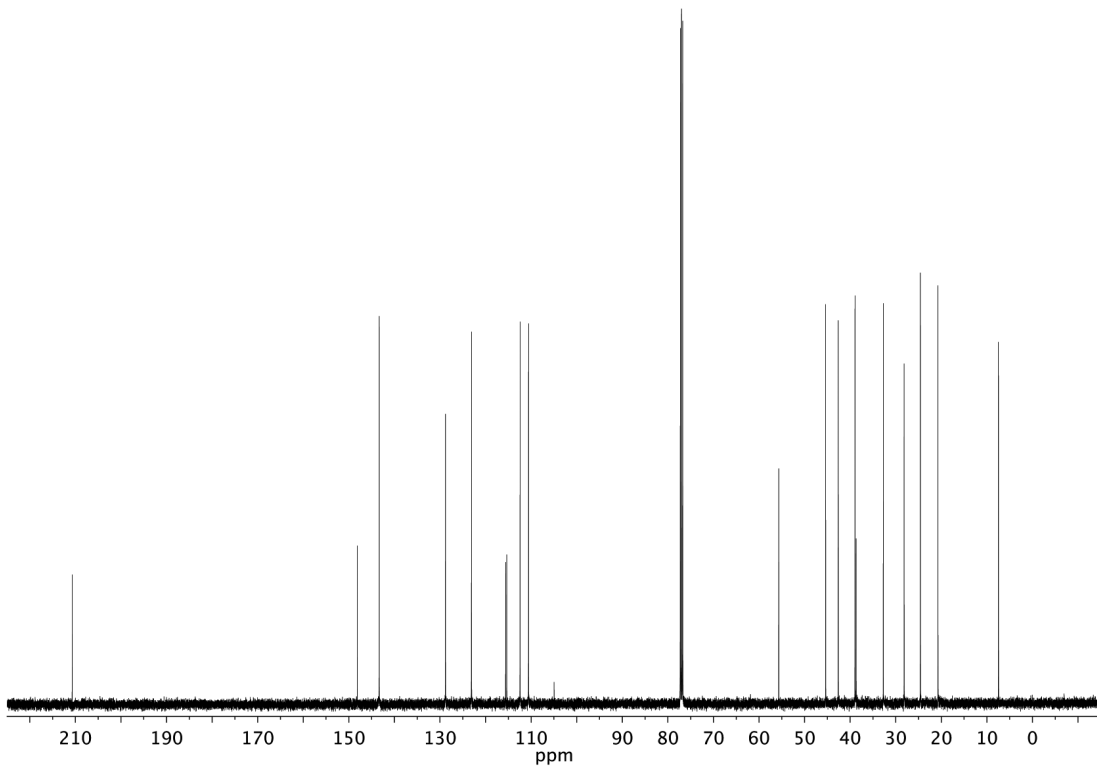

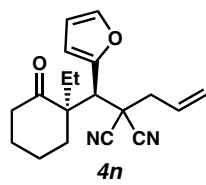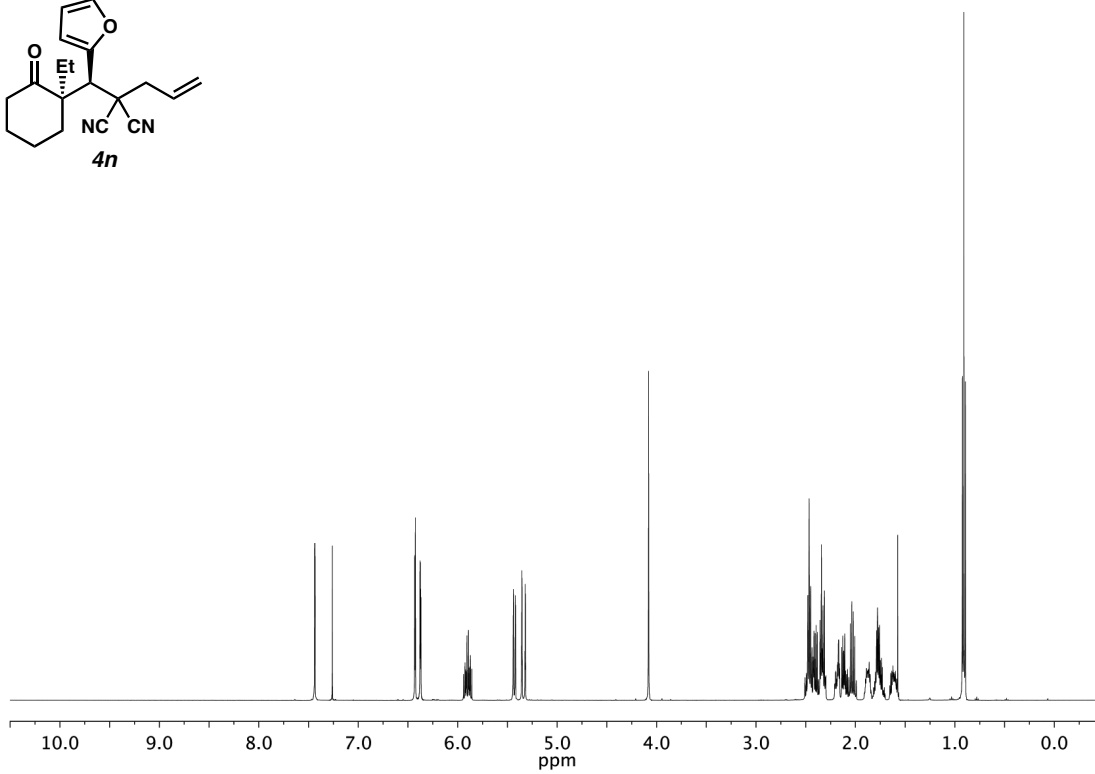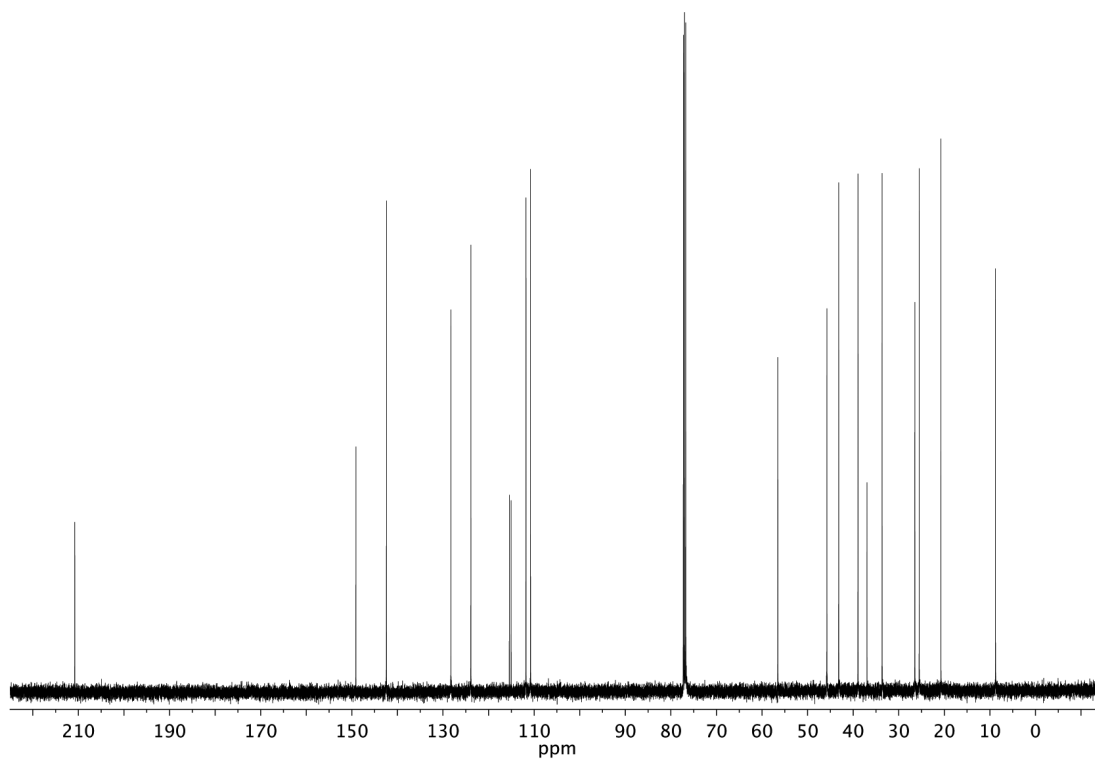

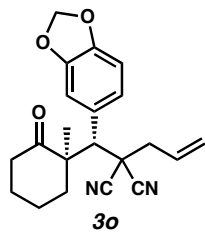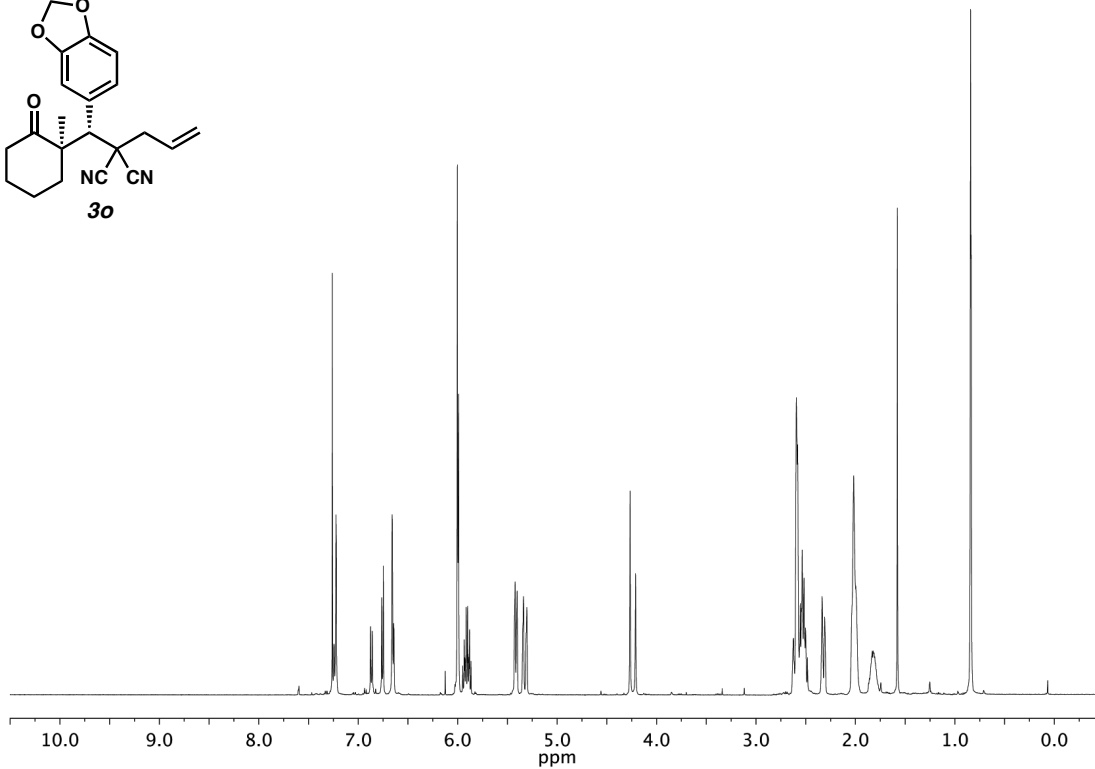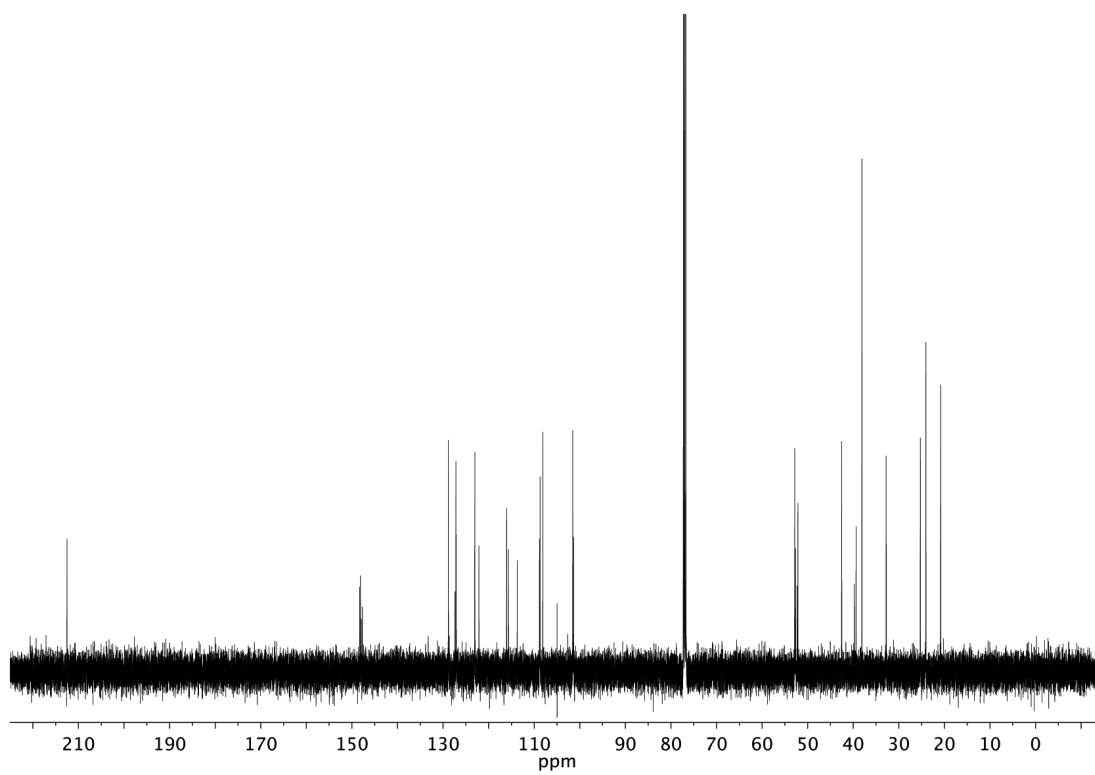

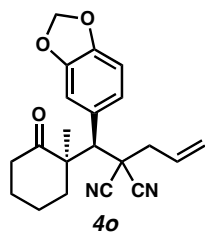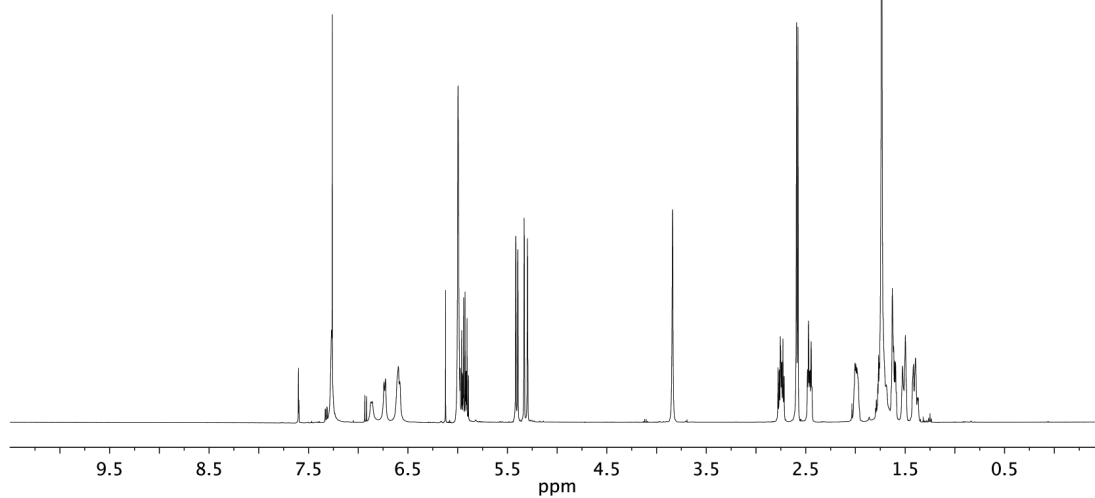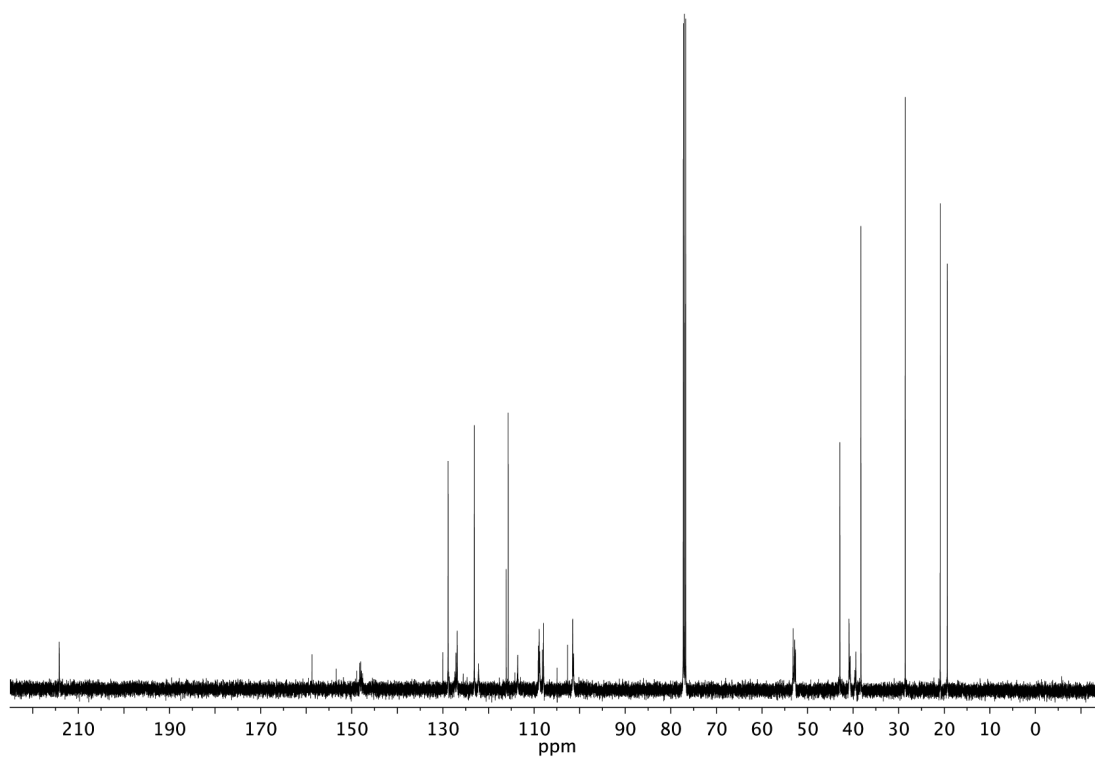

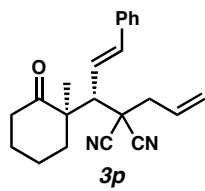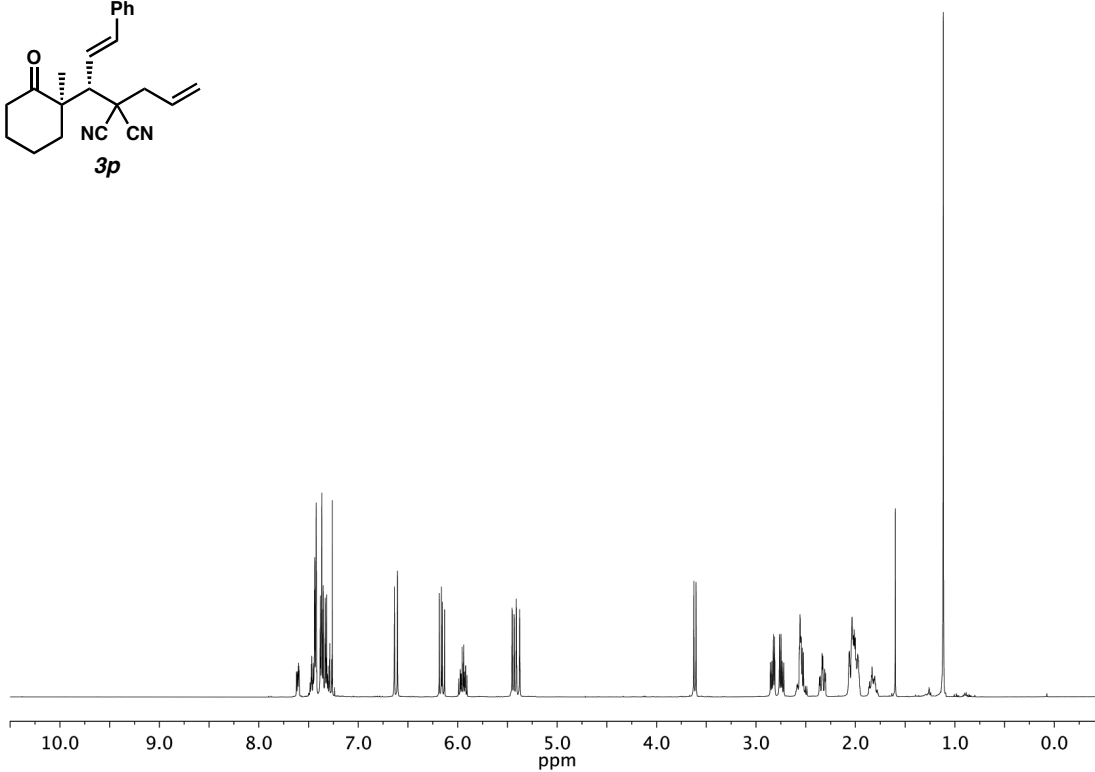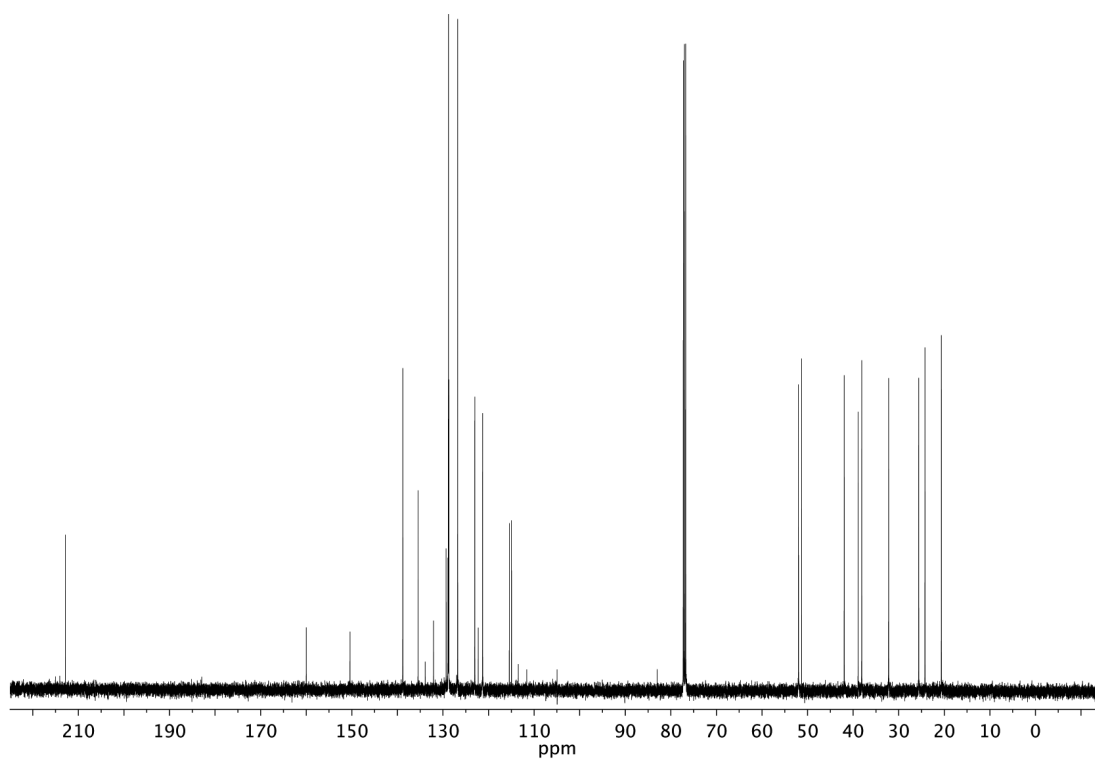

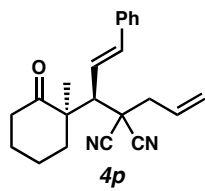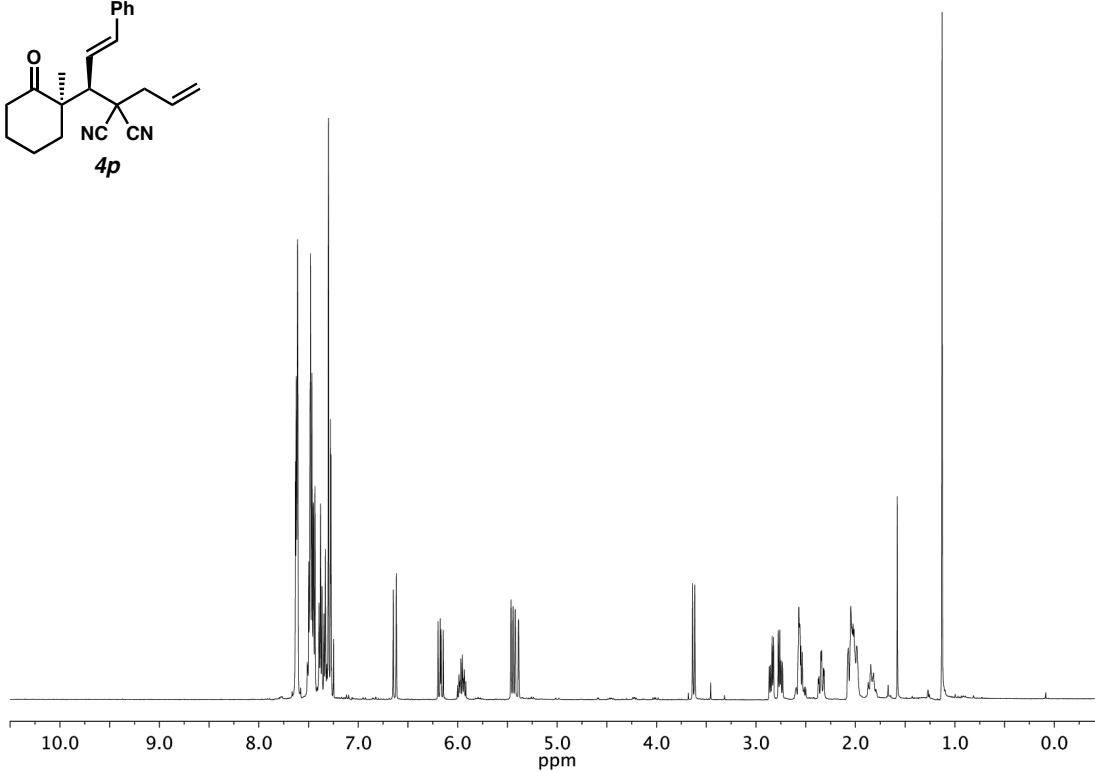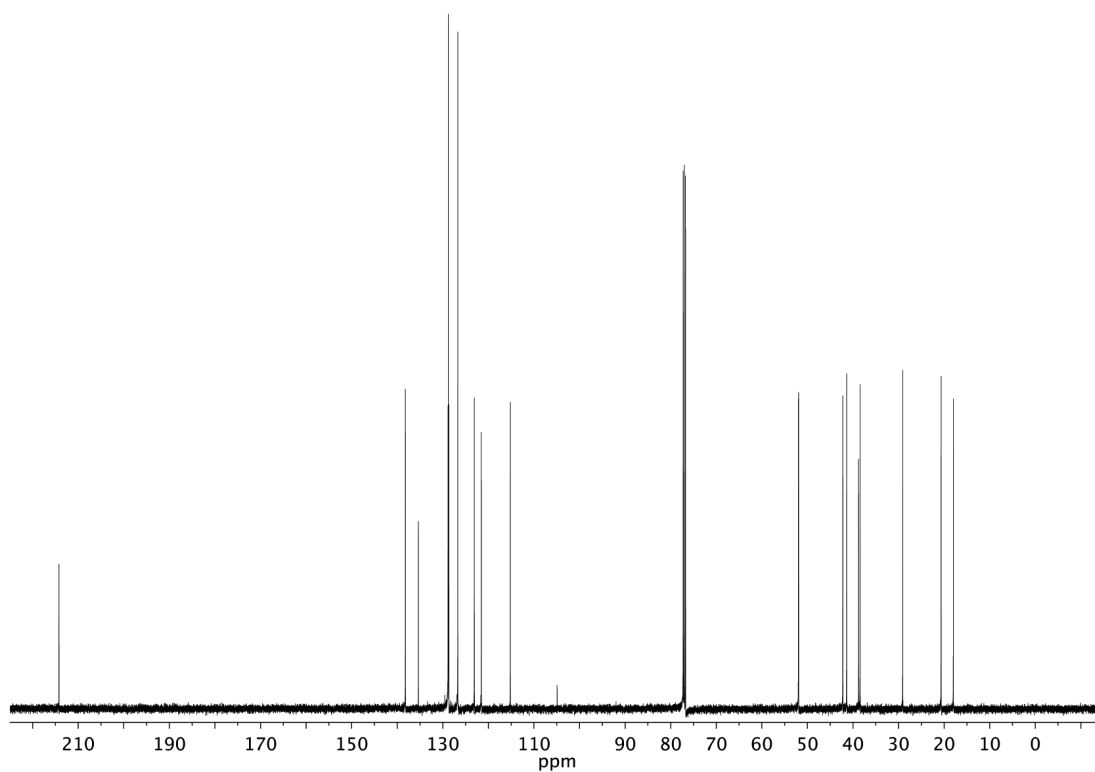

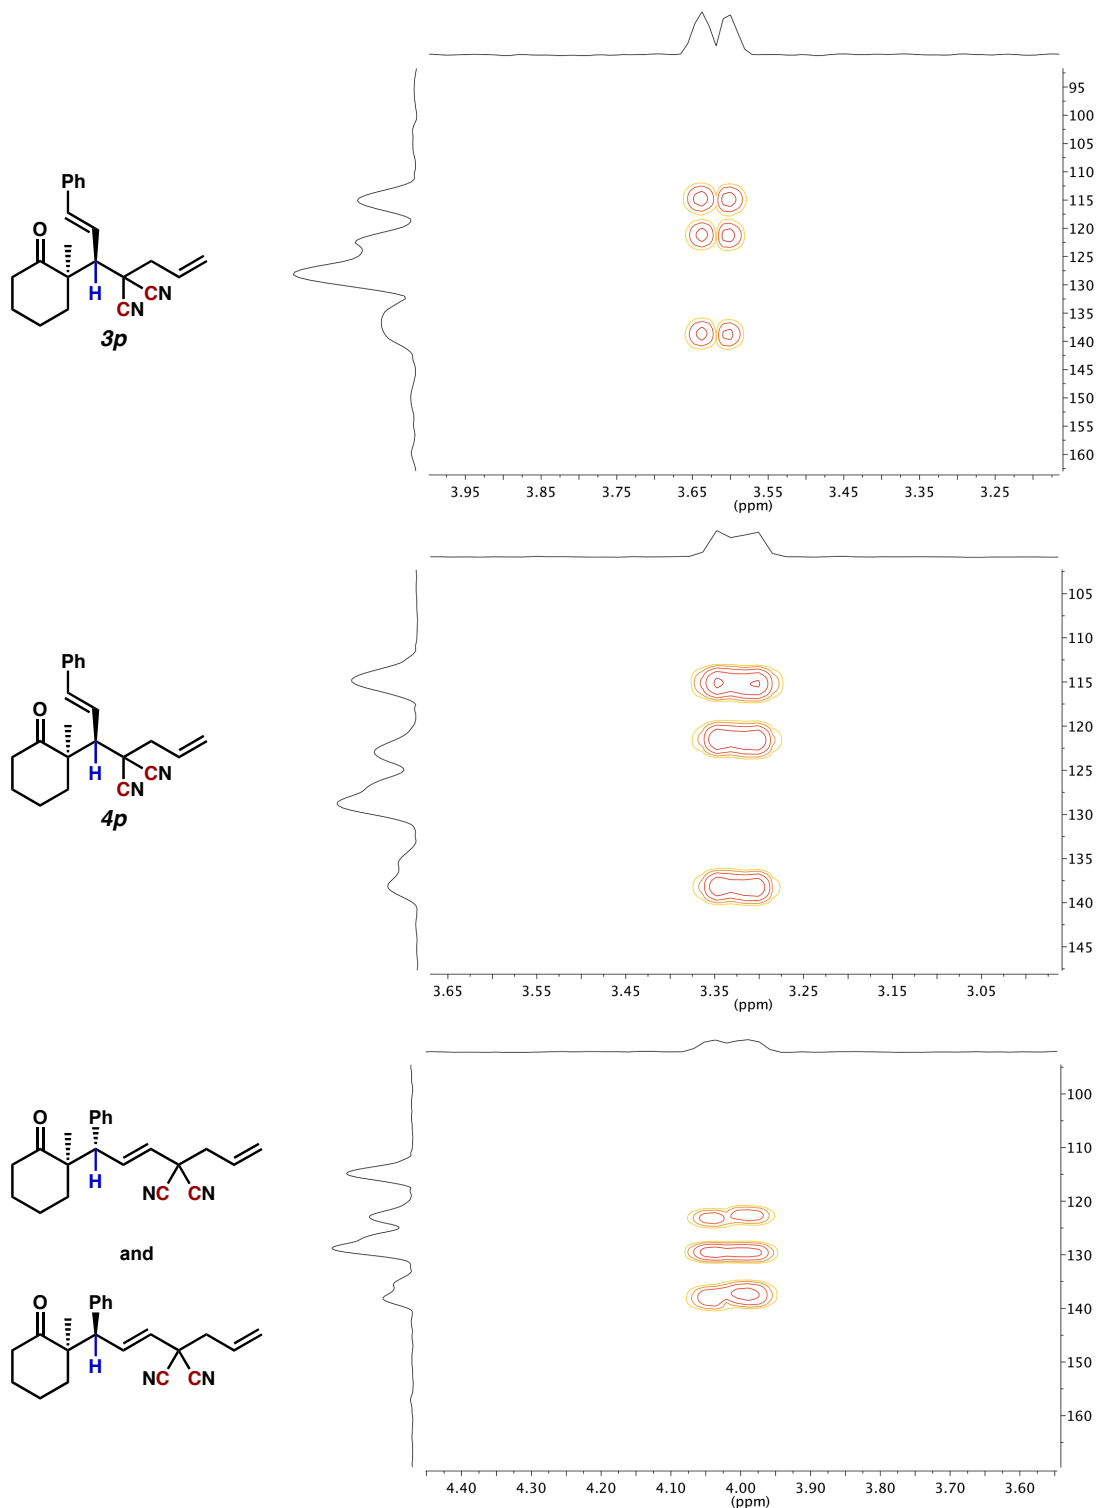

**GHMBC-nmr spectra (excerpts):**

In the upper two cases (**3,4p**) the proton signal at 3.6 or 3.3 ppm crosses with the nitrile carbons (at 115 ppm). In the case of the two minor isomers, which were not isolated from the asymmetric reaction (bottom), this signal is missing.

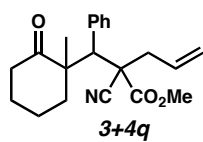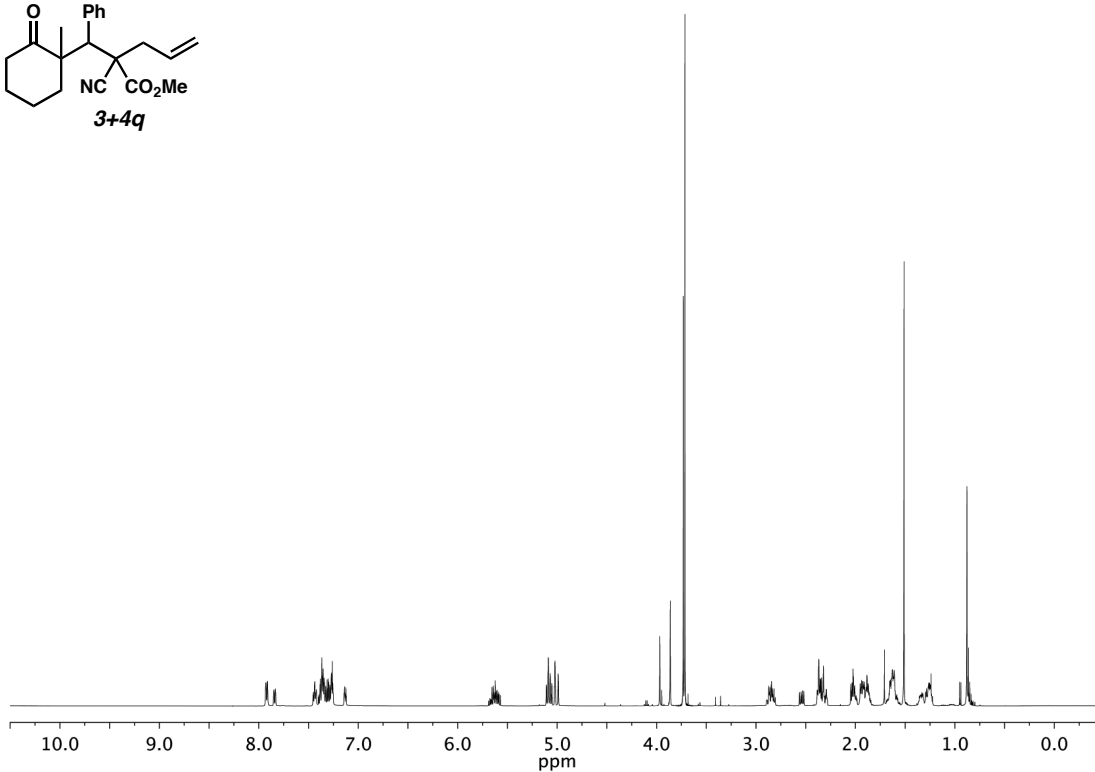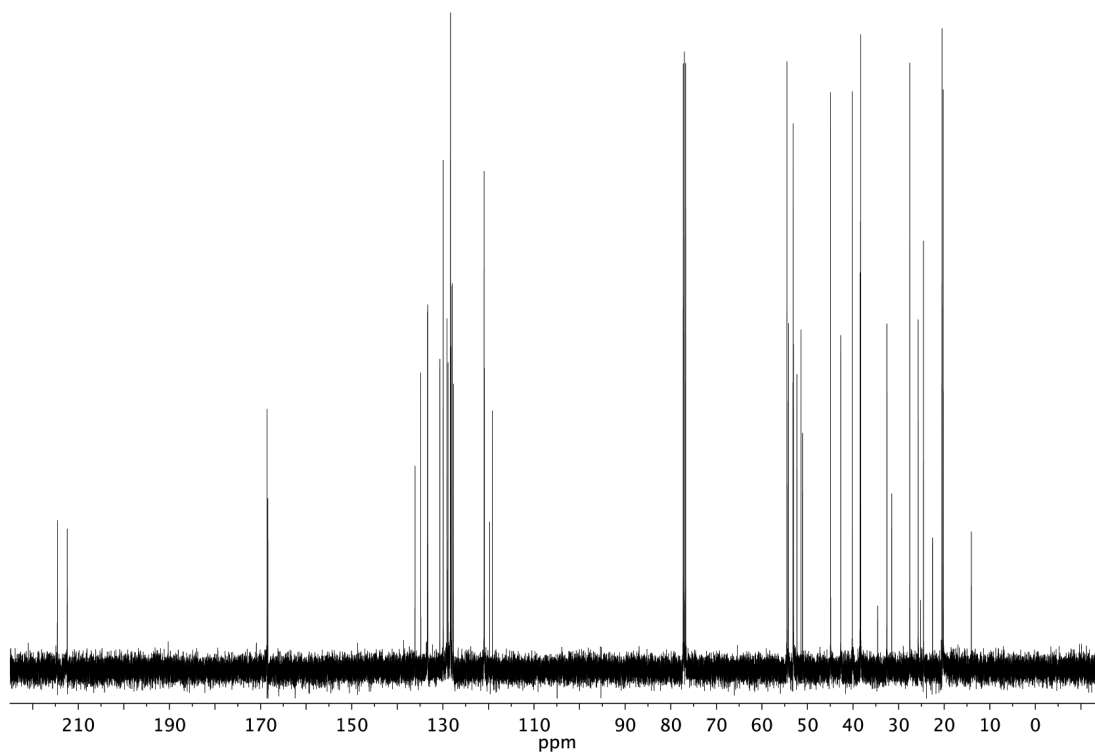



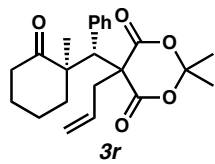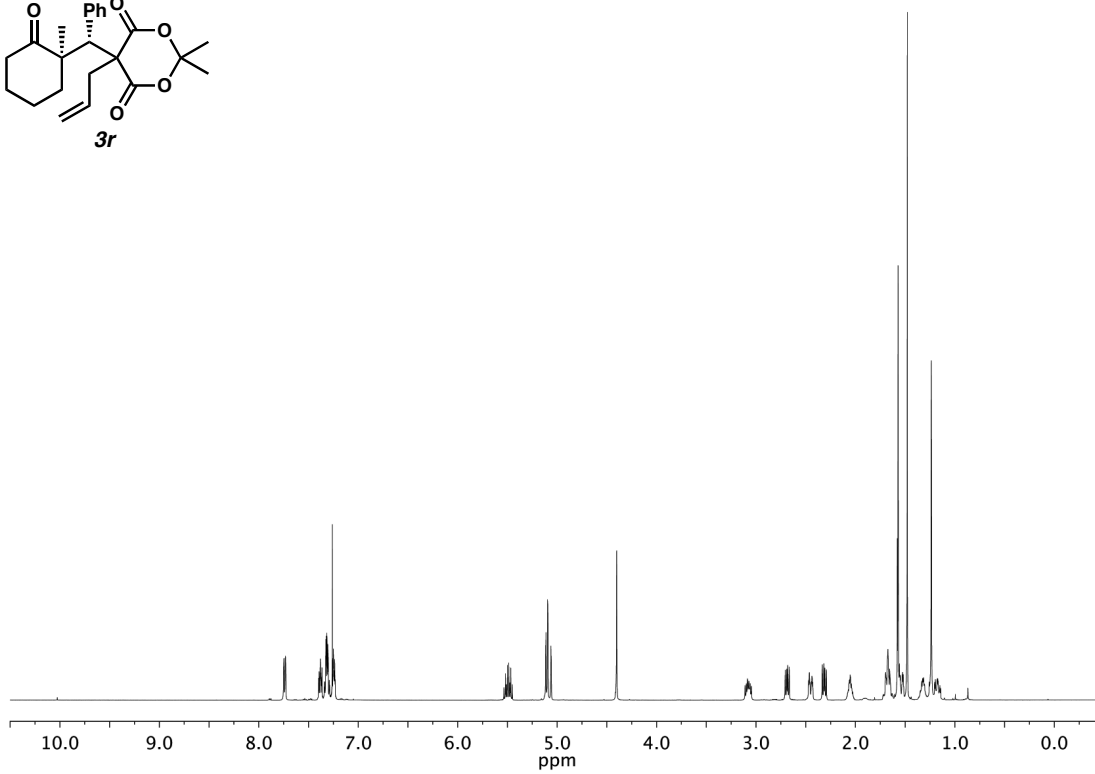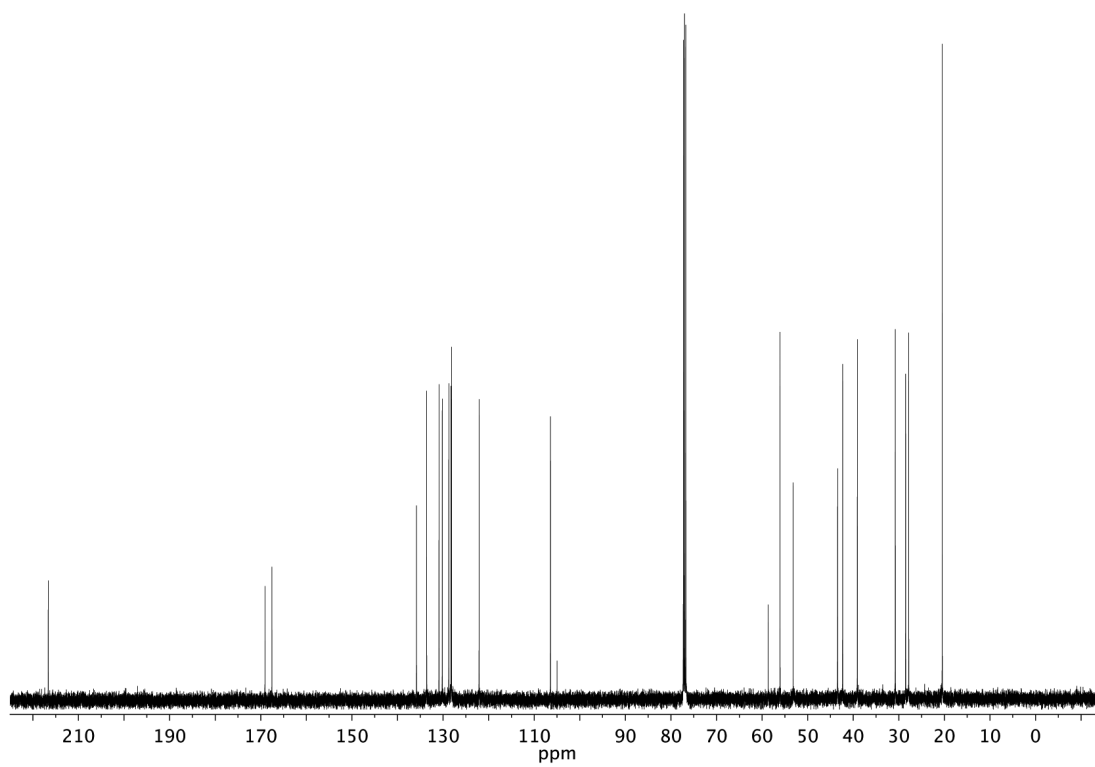

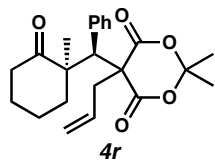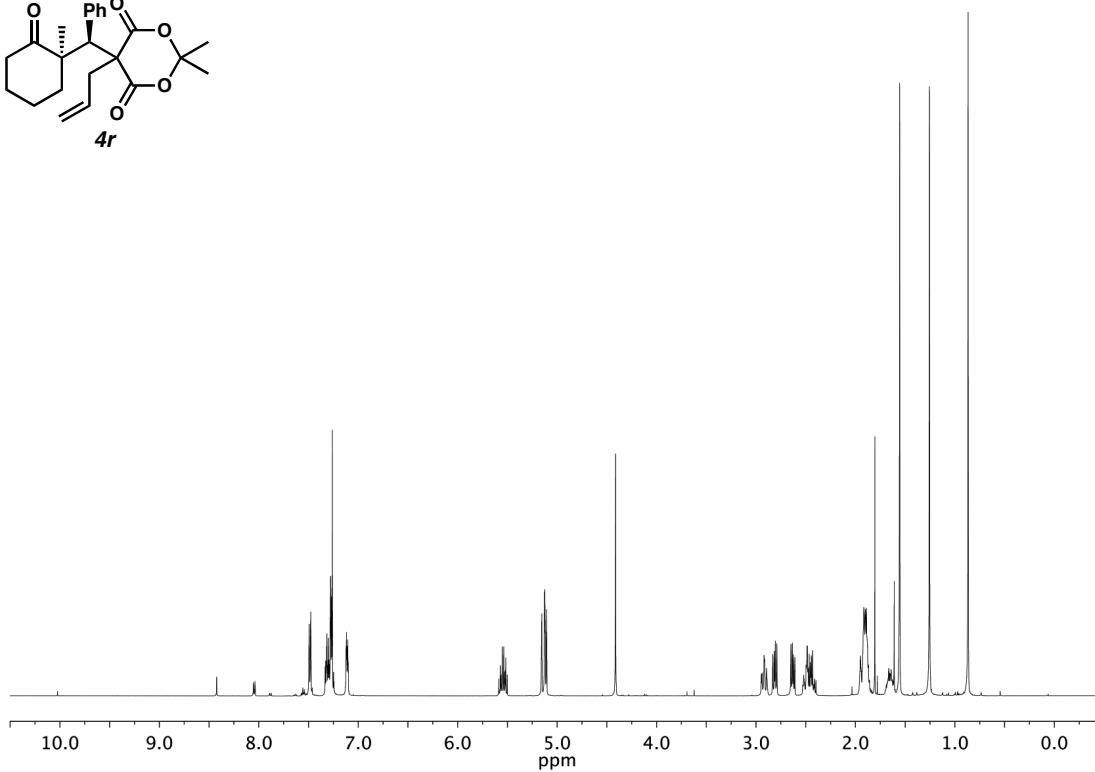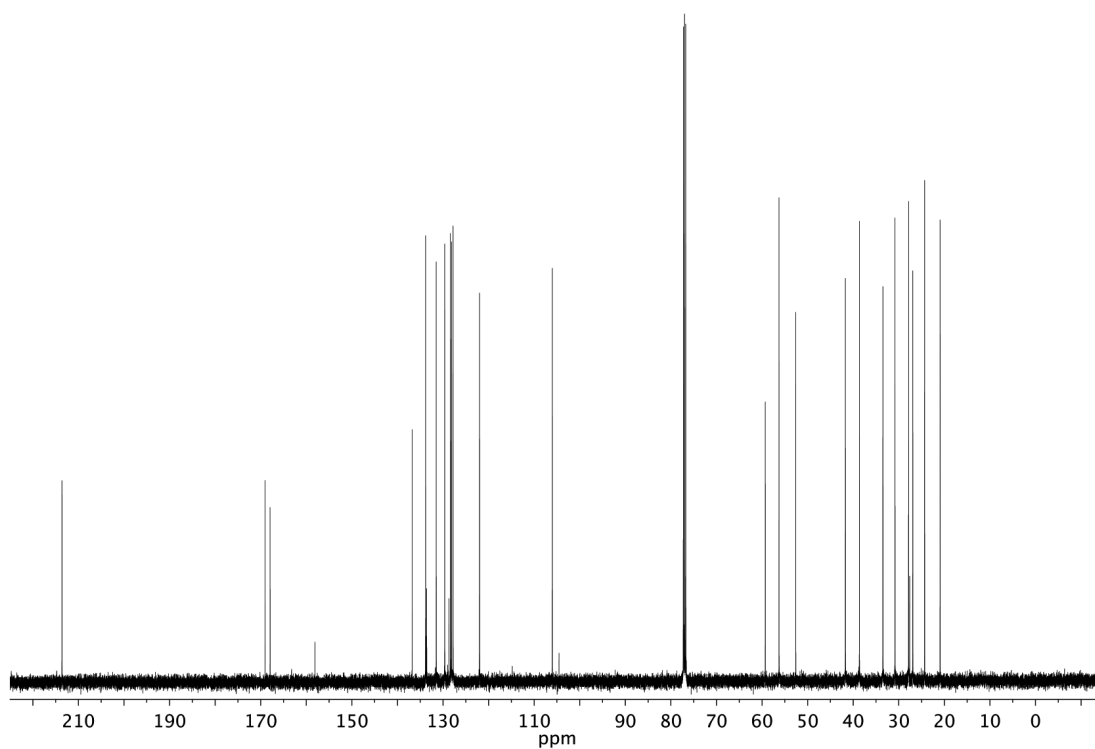

## **HPLC and SFC Data for Products 3 and 4**

Data File E:\JST2\JST116-1.D  
 Sample Name: jst-ii-116-1

```

=====
Acq. Operator   : jst                      Seq. Line : 3
Acq. Instrument : Instrument 3              Location  : Vial 31
Injection Date  : 12/17/2008 6:30:51 PM    Inj       : 1
                                           Inj Volume: 5 µl
Acq. Method     : C:\HPCHEM\3\METHODS\JST10IPA.M
Last changed    : 12/17/2008 6:10:30 PM by MSW
Analysis Method : C:\CHEM32\1\DATA\JST2\JST 2009-10-15 10-44-36\JST-II-283B-1.D\DA.M (JSTCHIRAL
C5 10IPA.M)
Last changed    : 10/17/2009 4:28:06 PM by jst
                (modified after loading)
Sample Info     : jst-ii-116-1,10% IPA, 1mL/min, 30min, 220nm
=====
  
```

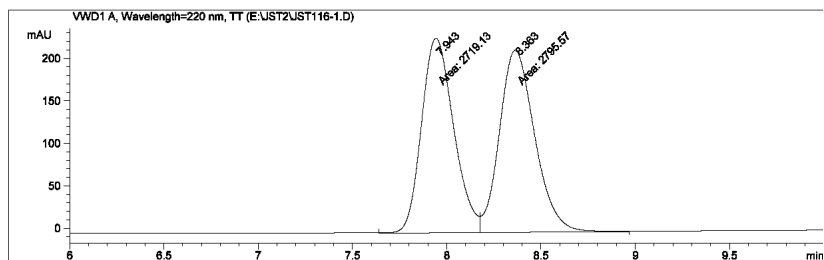

Area Percent Report

```

=====
Sorted By      : Signal
Multiplier     : 1.0000
Dilution      : 1.0000
Use Multiplier & Dilution Factor with ISTDs
=====
  
```

Signal 1: WWD1 A, Wavelength=220 nm, TT

| Peak # | RetTime [min] | Type | Width [min] | Area mAU *s | Height [mAU] | Area %  |
|--------|---------------|------|-------------|-------------|--------------|---------|
| 1      | 7.943         | MF   | 0.1977      | 2719.13086  | 229.18980    | 49.3069 |
| 2      | 8.363         | FM   | 0.2172      | 2795.57300  | 214.55382    | 50.6931 |

Totals : 5514.70386 443.74362

\*\*\* End of Report \*\*\*

Data File E:\JST2\JST165-1.D  
 Sample Name: jst-ii-165-1

```

=====
Acq. Operator   : jst                      Seq. Line : 4
Acq. Instrument : Instrument 3              Location  : Vial 71
Injection Date   : 2/21/2009 8:08:15 PM    Inj       : 1
                                           Inj Volume: 5 µl
Acq. Method     : C:\HPCHEM\3\METHODS\JST10IPY.M
Last changed    : 2/2/2009 7:39:10 PM by ntm
Analysis Method : C:\CHEM32\1\DATA\JST2\JST 2009-10-15 10-44-36\JST-II-283B-1.D\DA.M (JSTCHIRAL
C5 10IPA.M)
Last changed    : 10/17/2009 4:40:31 PM by jst
                (modified after loading)
Sample Info     : jst-ii-165-1, Diast 1, OD-H, 10%IPA, 1ml/min, 20min, 21
                0 nm
=====
  
```

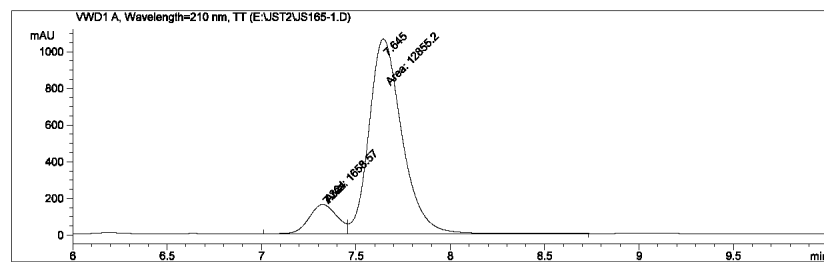

Area Percent Report

```

=====
Sorted By      : Signal
Multiplier     : 1.0000
Dilution      : 1.0000
Use Multiplier & Dilution Factor with ISTDs
=====
  
```

Signal 1: WWD1 A, Wavelength=210 nm, TT

| Peak # | RetTime [min] | Type | Width [min] | Area mAU *s | Height [mAU] | Area %  |
|--------|---------------|------|-------------|-------------|--------------|---------|
| 1      | 7.324         | MF   | 0.1732      | 1658.56885  | 159.60066    | 11.4275 |
| 2      | 7.645         | FM   | 0.2017      | 1.28552e4   | 1062.45593   | 88.5725 |

Totals : 1.45138e4 1222.05659

\*\*\* End of Report \*\*\*

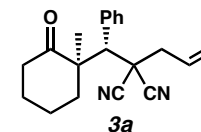

Data File E:\JST2\JST116-2.D  
Sample Name: jst-ii-116-2

=====

|                 |                         |            |           |
|-----------------|-------------------------|------------|-----------|
| Acq. Operator   | : jst                   | Seq. Line  | : 2       |
| Acq. Instrument | : Instrument 3          | Location   | : Vial 32 |
| Injection Date  | : 12/17/2008 6:45:33 PM | Inj        | : 1       |
|                 |                         | Inj Volume | : 5 µl    |

Acq. Method : C:\HPCHEM\3\METHODS\JST10IPA.M  
Last changed : 12/17/2008 6:10:30 PM by MSW  
Analysis Method : C:\CHEM32\1\DATA\JST2\JST 2009-10-15 10-44-36\JST-II-283B-1.D\DA.M (JSTCHIRAL C5 10IPA.M)  
Last changed : 10/17/2009 4:41:43 PM by jst  
(modified after loading)  
Sample Info : jst-ii-116-2, 10% IPA, 1mL/min, 30min, 220nm

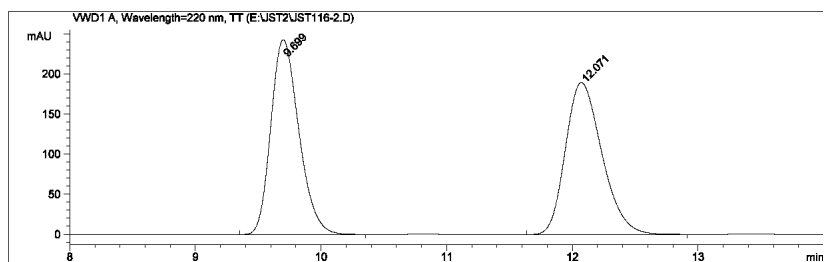

=====  
Area Percent Report  
=====

Sorted By : Signal  
Multiplier : 1.0000  
Dilution : 1.0000  
Use Multiplier & Dilution Factor with ISTDs

Signal 1: WVD1 A, Wavelength=220 nm, TT

| Peak # | RetTime [min] | Type | Width [min] | Area mAU   | Height *s [mAU] | Area %  |
|--------|---------------|------|-------------|------------|-----------------|---------|
| 1      | 9.699         | BB   | 0.2391      | 3765.78906 | 242.89462       | 49.6787 |
| 2      | 12.071        | BB   | 0.3122      | 3814.49902 | 189.38126       | 50.3213 |

Totals :                               7580.28809   432.27588

=====  
\*\*\* End of Report \*\*\*

Instrument 1 10/17/2009 4:41:45 PM jst

Data File E:\JST2\JS165-2.D  
Sample Name: jst-ii-165-2

=====

|                 |                        |            |           |
|-----------------|------------------------|------------|-----------|
| Acq. Operator   | : jst                  | Seq. Line  | : 6       |
| Acq. Instrument | : Instrument 3         | Location   | : Vial 72 |
| Injection Date  | : 2/21/2009 8:40:05 PM | Inj        | : 1       |
|                 |                        | Inj Volume | : 5 µl    |

Acq. Method : C:\HPCHEM\3\METHODS\JST10IPY.M  
Last changed : 2/2/2009 7:39:10 PM by ntm  
Analysis Method : C:\CHEM32\1\DATA\JST2\JST 2009-10-15 10-44-36\JST-II-283B-1.D\DA.M (JSTCHIRAL C5 10IPA.M)  
Last changed : 10/17/2009 4:42:10 PM by jst  
(modified after loading)  
Sample Info : jst-ii-165-2, Diast 1, CD-H, 10%IPA, 1ml/min, 20min, 210 nm

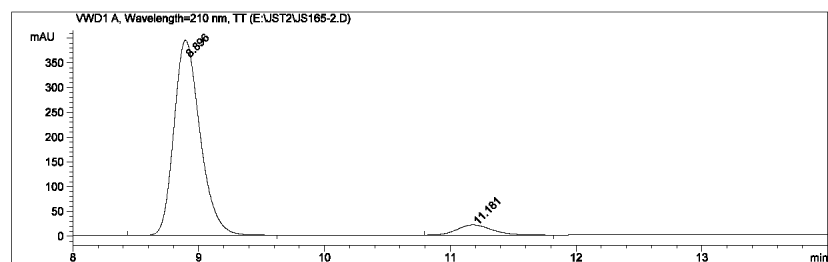

=====  
Area Percent Report  
=====

Sorted By : Signal  
Multiplier : 1.0000  
Dilution : 1.0000  
Use Multiplier & Dilution Factor with ISTDs

Signal 1: WVD1 A, Wavelength=210 nm, TT

| Peak # | RetTime [min] | Type | Width [min] | Area mAU   | Height *s [mAU] | Area %  |
|--------|---------------|------|-------------|------------|-----------------|---------|
| 1      | 8.896         | VB   | 0.2218      | 5663.72656 | 393.58646       | 93.5253 |
| 2      | 11.181        | BB   | 0.2932      | 392.09930  | 20.48903        | 6.4747  |

Totals :                               6055.82587   414.07549

=====  
\*\*\* End of Report \*\*\*

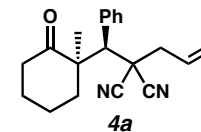

Page 1 of 1    Instrument 1 10/17/2009 4:42:20 PM jst

Page 1 of 1

Data File E:\JST2\JS138-1A.D  
 Sample Name: jst-ii-138-1

```

=====
Acq. Operator   : jst                      Seq. Line :    4
Acq. Instrument : Instrument 3              Location  : Vial 71
Injection Date  : 1/29/2009 8:41:59 PM     Inj       :    1
                                           Inj Volume: 5 µl

Acq. Method     : C:\HPCHEM\3\METHODS\JST10IPY.M
Last changed    : 1/29/2009 8:40:59 PM by ntm
Analysis Method : C:\CHEM32\1\DATA\JST2\JST 2009-10-15 10-44-36\JST-II-283B-1.D\DA.M (JSTCHIRAL
                  C5 10IPA.M)
Last changed    : 10/17/2009 4:42:53 PM by jst
                  (modified after loading)
Sample Info     : jst-ii-138-1,diast1, 10% IPA, OD-H, 1ml/min 20min, 210n
                  m
                  rac
  
```

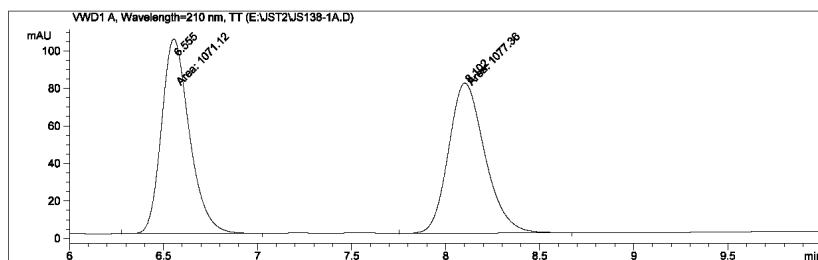

Area Percent Report

```

Sorted By      : Signal
Multiplier     : 1.0000
Dilution      : 1.0000
Use Multiplier & Dilution Factor with ISTDs
  
```

Signal 1: VWD1 A, Wavelength=210 nm, TT

| Peak # | RetTime [min] | Type | Width [min] | Area mAU   | Area %  | Height [mAU] | Area %  |
|--------|---------------|------|-------------|------------|---------|--------------|---------|
| 1      | 6.555         | MM   | 0.1720      | 1071.11731 | 49.8548 | 103.76250    | 49.8548 |
| 2      | 8.102         | MM   | 0.2242      | 1077.35596 | 50.1452 | 80.07286     | 50.1452 |

Totals : 2148.47327 183.83536

\*\*\* End of Report \*\*\*

Data File E:\JST2\JS166-1.D  
 Sample Name: jst-ii-166-1

```

=====
Acq. Operator   : jst                      Seq. Line :    4
Acq. Instrument : Instrument 3              Location  : Vial 71
Injection Date   : 2/23/2009 1:19:35 AM     Inj       :    1
                                           Inj Volume: 5 µl

Acq. Method     : C:\HPCHEM\3\METHODS\JST10IPY.M
Last changed    : 2/2/2009 7:39:10 PM by ntm
Analysis Method : C:\CHEM32\1\DATA\JST2\JST 2009-10-15 10-44-36\JST-II-283B-1.D\DA.M (JSTCHIRAL
                  C5 10IPA.M)
Last changed    : 10/17/2009 4:45:00 PM by jst
                  (modified after loading)
Sample Info     : jst-ii-166-1, Diast 1, OD-H, 10%IPA, 1ml/min, 20min, 21
                  0 nm
  
```

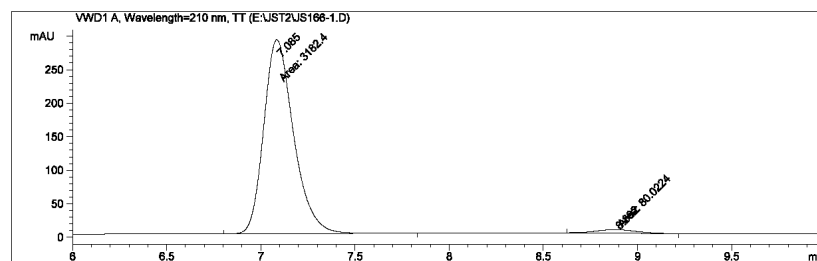

Area Percent Report

```

Sorted By      : Signal
Multiplier     : 1.0000
Dilution      : 1.0000
Use Multiplier & Dilution Factor with ISTDs
  
```

Signal 1: VWD1 A, Wavelength=210 nm, TT

| Peak # | RetTime [min] | Type | Width [min] | Area mAU   | Area %  | Height [mAU] | Area %  |
|--------|---------------|------|-------------|------------|---------|--------------|---------|
| 1      | 7.085         | MM   | 0.1832      | 3182.40210 | 97.5471 | 289.57819    | 97.5471 |
| 2      | 8.882         | MM   | 0.2466      | 80.02241   | 2.4529  | 5.40944      | 2.4529  |

Totals : 3262.42451 294.98763

\*\*\* End of Report \*\*\*

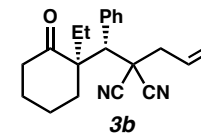



Data File E:\JST2\JS198-1.D  
 Sample Name: jst-ii-198-1

```

=====
Acq. Operator   : jst                      Seq. Line :    5
Acq. Instrument : Instrument 3              Location  : Vial 91
Injection Date  : 4/14/2009 7:53:52 PM     Inj       :    1
                                           Inj Volume: 5 µl
Acq. Method     : C:\HPCHEM\3\METHODS\JST10IPY.M
Last changed    : 3/10/2009 3:03:02 PM by jst
Analysis Method : C:\CHEM32\1\DATA\JST2\JST 2009-10-15 10-44-36\JST-II-283B-1.D\DA.M (JSTCHIRAL
                  C5 10IPA.M)
Last changed    : 10/17/2009 4:49:57 PM by jst
                  (modified after loading)
Sample Info     : jst-ii-198-1, 1st diast, OD-H, 10% IPA, 1ml/min, 40min,
                  210nm
=====
  
```

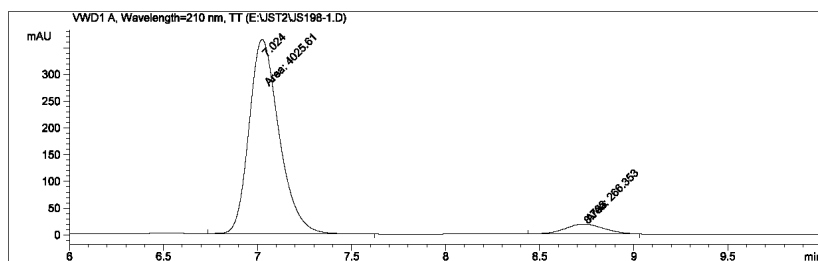

Area Percent Report

```

Sorted By      : Signal
Multiplier     : 1.0000
Dilution      : 1.0000
Use Multiplier & Dilution Factor with ISTDs
  
```

Signal 1: WVD1 A, Wavelength=210 nm, TT

| Peak # | RetTime [min] | Type | Width [min] | Area mAU   | Height [mAU] | Area %  |
|--------|---------------|------|-------------|------------|--------------|---------|
| 1      | 7.024         | MM   | 0.1848      | 4025.61377 | 363.09946    | 93.7942 |
| 2      | 8.733         | MM   | 0.2390      | 266.35269  | 18.57378     | 6.2058  |

Totals : 4291.96646 381.67324

\*\*\* End of Report \*\*\*

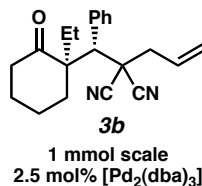

Data File E:\JST2\JS198-2B.D  
 Sample Name: jst-ii-198-2

```

=====
Acq. Operator   : jst                      Seq. Line :    3
Acq. Instrument : Instrument 3              Location  : Vial 92
Injection Date  : 4/14/2009 11:25:44 PM     Inj       :    1
                                           Inj Volume: 5 µl
Acq. Method     : C:\HPCHEM\3\METHODS\JST51PY.M
Last changed    : 3/20/2009 7:53:11 PM by JL
Analysis Method : C:\CHEM32\1\DATA\JST2\JST 2009-10-15 10-44-36\JST-II-283B-1.D\DA.M (JSTCHIRAL
                  C5 10IPA.M)
Last changed    : 10/17/2009 4:50:31 PM by jst
                  (modified after loading)
Sample Info     : jst-ii-198-2, 2nd diast, OD-H, 5% IPA, 1ml/min, 40min,
                  210nm
=====
  
```

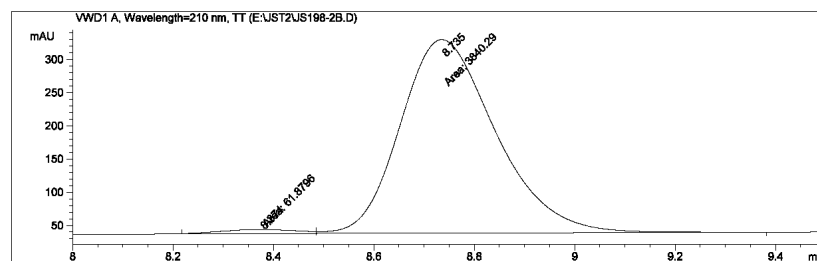

Area Percent Report

```

Sorted By      : Signal
Multiplier     : 1.0000
Dilution      : 1.0000
Use Multiplier & Dilution Factor with ISTDs
  
```

Signal 1: WVD1 A, Wavelength=210 nm, TT

| Peak # | RetTime [min] | Type | Width [min] | Area mAU   | Height [mAU] | Area %  |
|--------|---------------|------|-------------|------------|--------------|---------|
| 1      | 8.374         | MF   | 0.1691      | 61.87960   | 6.09783      | 1.5858  |
| 2      | 8.735         | EM   | 0.2197      | 3840.28687 | 291.36536    | 98.4142 |

Totals : 3902.16646 297.46319

\*\*\* End of Report \*\*\*

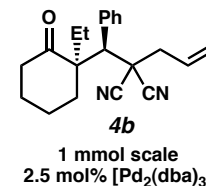



Data File E:\DEW1079B.D  
Sample Name: DEW1079B

=====  
Acq. Operator : DEW                      Seq. Line : 3  
Acq. Instrument : Instrument 3            Location : Vial 4  
Injection Date : 3/7/2006 1:34:54 PM    Inj : 1  
                                          Inj Volume : 5 µl  
Acq. Method : C:\HPCHEM\3\METHODS\4-E0H60W.M  
Last changed : 3/7/2006 1:18:52 PM by jlr  
Analysis Method : C:\CHEM32\1\DATA\JST2\JST 2009-10-15 10-44-36\JST-II-283B-1.D\DA.M (JSTCHIRAL  
                                          C5 10IPA.M)  
Last changed : 10/17/2009 4:54:33 PM by jst  
                                          (modified after loading)

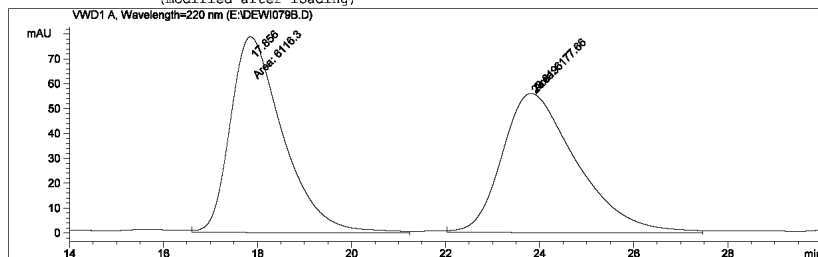

=====  
Area Percent Report  
=====

Sorted By : Signal  
Multiplier : 1.0000  
Dilution : 1.0000  
Use Multiplier & Dilution Factor with ISTDs

Signal 1: VWD1 A, Wavelength=220 nm

| Peak # | RetTime [min] | Type | Width [min] | Area mAU *s | Height [mAU] | Area %  |
|--------|---------------|------|-------------|-------------|--------------|---------|
| 1      | 17.856        | MM   | 1.2945      | 6116.29688  | 78.74833     | 49.7504 |
| 2      | 23.819        | MM   | 1.8397      | 6177.66113  | 55.96516     | 50.2496 |

Totals :                      1.22940e4   134.71349

=====  
\*\*\* End of Report \*\*\*

Data File E:\JST2\JST175-1C.D  
Sample Name: jst-ii-177-1

=====  
Acq. Operator : jst                      Seq. Line : 23  
Acq. Instrument : Instrument 3            Location : Vial 71  
Injection Date : 3/3/2009 12:43:05 AM    Inj : 1  
                                          Inj Volume : 15 µl  
Acq. Method : C:\HPCHEM\3\METHODS\JST177.M  
Last changed : 3/3/2009 12:28:10 AM by jst  
Analysis Method : C:\CHEM32\1\DATA\JST2\JST 2009-10-15 10-44-36\JST-II-283B-1.D\DA.M (JSTCHIRAL  
                                          C5 10IPA.M)  
Last changed : 10/17/2009 4:55:27 PM by jst  
                                          (modified after loading)

Sample Info : jst-ii-177-1, Diast 1, OJ, 4%EtOH, 1ml/min, 40min, 210n  
                                          m

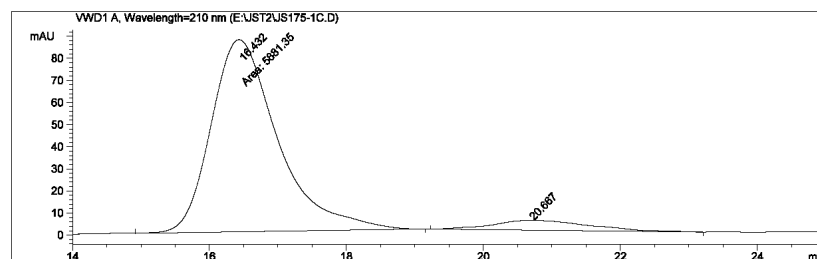

=====  
Area Percent Report  
=====

Sorted By : Signal  
Multiplier : 1.0000  
Dilution : 1.0000  
Use Multiplier & Dilution Factor with ISTDs

Signal 1: VWD1 A, Wavelength=210 nm

| Peak # | RetTime [min] | Type | Width [min] | Area mAU *s | Height [mAU] | Area %  |
|--------|---------------|------|-------------|-------------|--------------|---------|
| 1      | 16.432        | MM   | 1.1276      | 5881.35107  | 86.92758     | 92.9751 |
| 2      | 20.667        | BV   | 1.1763      | 444.37845   | 4.41816      | 7.0249  |

Totals :                      6325.72952   91.34574

=====  
\*\*\* End of Report \*\*\*

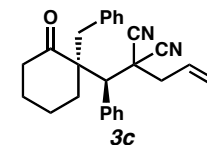





Data File E:\JST2\JS171-2E.D  
 Sample Name: jst-ii-171-2

```

=====
Acq. Operator   : jst                      Seq. Line :    6
Acq. Instrument : Instrument 3              Location  : Vial 71
Injection Date  : 3/5/2009 3:24:42 PM      Inj       :    1
                                           Inj Volume: 5 µl

Acq. Method     : C:\HPCHEM\3\METHODS\JS171-2.M
Last changed    : 3/5/2009 12:49:08 PM by jst
Analysis Method : C:\CHEM32\1\DATA\JST2\JST 2009-10-15 10-44-36\JST-II-283B-1.D\DA.M (JSTCHIRAL
                  C5 10IPA.M)
Last changed    : 10/17/2009 5:01:32 PM by jst
                  (modified after loading)
Sample Info     : jst-ii-171-2, Diast 1, OD-H, 3%IPA, 1ml/min, 40min, 210
                  nm
=====
  
```

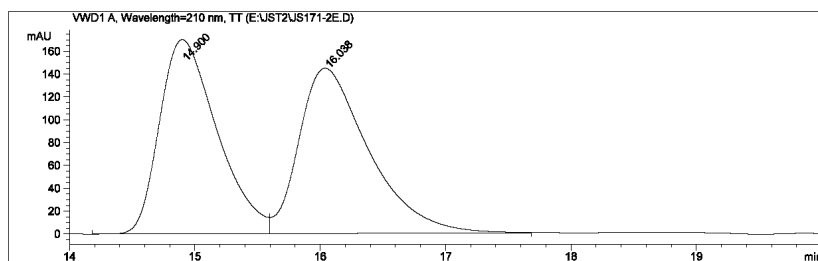

Area Percent Report

```

Sorted By      : Signal
Multiplier     : 1.0000
Dilution       : 1.0000
Use Multiplier & Dilution Factor with ISTDs
  
```

Signal 1: WVD1 A, Wavelength=210 nm, TT

| Peak # | RetTime [min] | Type | Width [min] | Area mAU*s | Height [mAU] | Area %  |
|--------|---------------|------|-------------|------------|--------------|---------|
| 1      | 14.900        | VV   | 0.4826      | 5419.77686 | 169.98222    | 49.1140 |
| 2      | 16.038        | VB   | 0.5787      | 5615.32031 | 144.70215    | 50.8860 |

Totals : 1.10351e4 314.68437

\*\*\* End of Report \*\*\*

Data File E:\JST2\JS179-1.D  
 Sample Name: jst-ii-179-1

```

=====
Acq. Operator   : jst                      Seq. Line :   11
Acq. Instrument : Instrument 3              Location  : Vial 91
Injection Date   : 3/6/2009 2:54:04 AM      Inj       :    1
                                           Inj Volume: 5 µl

Acq. Method     : C:\HPCHEM\3\METHODS\JS171-2A.M
Last changed    : 3/5/2009 5:28:08 PM by jst
Analysis Method : C:\CHEM32\1\DATA\JST2\JST 2009-10-15 10-44-36\JST-II-283B-1.D\DA.M (JSTCHIRAL
                  C5 10IPA.M)
Last changed    : 10/17/2009 5:02:51 PM by jst
                  (modified after loading)
Sample Info     : jst-ii-179-1, Diast 1, ODH, 3%IPA, 1ml/min, 210nm
=====
  
```

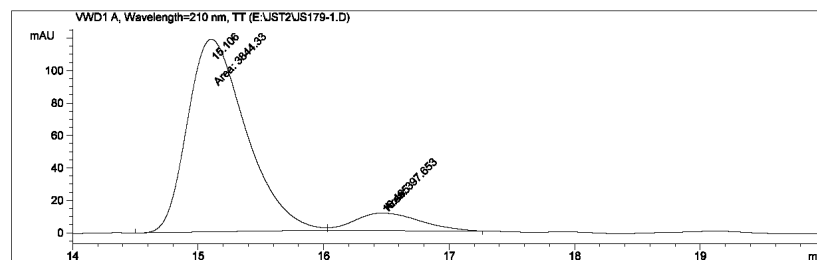

Area Percent Report

```

Sorted By      : Signal
Multiplier     : 1.0000
Dilution       : 1.0000
Use Multiplier & Dilution Factor with ISTDs
  
```

Signal 1: WVD1 A, Wavelength=210 nm, TT

| Peak # | RetTime [min] | Type | Width [min] | Area mAU*s | Height [mAU] | Area %  |
|--------|---------------|------|-------------|------------|--------------|---------|
| 1      | 15.106        | MM   | 0.5395      | 3844.32886 | 118.75735    | 90.6258 |
| 2      | 16.465        | MM   | 0.6136      | 397.65253  | 10.80195     | 9.3742  |

Totals : 4241.98138 129.55929

\*\*\* End of Report \*\*\*

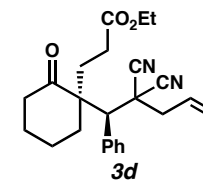

Data File E:\JST2\JS171-3D.D  
 Sample Name: jst-ii-171-3

```

=====
Acq. Operator   : jst                      Seq. Line :    3
Acq. Instrument : Instrument 3              Location  : Vial 72
Injection Date  : 3/5/2009 10:43:27 AM     Inj       :    1
                                           Inj Volume: 5 µl

Acq. Method    : C:\HPCHEM\3\METHODS\JS171-2.M
Last changed   : 3/5/2009 11:20:55 AM by jst
                (modified after loading)
Analysis Method: C:\CHEM32\1\DATA\JST2\JST 2009-10-15 10-44-36\JST-II-283B-1.D\DA.M (JSTCHIRAL
                C5 10IPA.M)
Last changed   : 10/17/2009 5:03:21 PM by jst
                (modified after loading)
Sample Info    : jst-ii-171-3, Diast 2, OJ, 5%EtOH, 1mL/min, 60min, 210n
                m
  
```

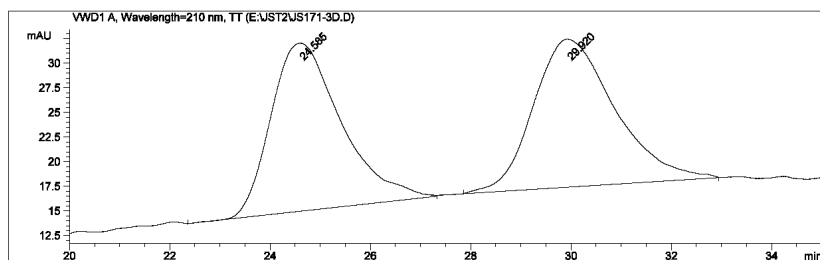

Area Percent Report

```

Sorted By      : Signal
Multiplier     : 1.0000
Dilution      : 1.0000
Use Multiplier & Dilution Factor with ISTDs
  
```

Signal 1: WVD1 A, Wavelength=210 nm, TT

| Peak # | RetTime [min] | Type | Width [min] | Area mAU*s | Height [mAU] | Area %  |
|--------|---------------|------|-------------|------------|--------------|---------|
| 1      | 24.585        | VB   | 1.1437      | 1665.96545 | 17.08151     | 49.5903 |
| 2      | 29.920        | BB   | 1.3197      | 1693.49585 | 15.03772     | 50.4097 |

Totals : 3359.46130 32.11923

\*\*\* End of Report \*\*\*

Data File E:\JST2\JS179-2Y.D  
 Sample Name: jst-ii-179-2

```

=====
Acq. Operator   : jst                      Seq. Line :    2
Acq. Instrument : Instrument 3              Location  : Vial 91
Injection Date  : 3/5/2009 2:06:51 PM     Inj       :    1
                                           Inj Volume: 25 µl

Acq. Method    : C:\HPCHEM\3\METHODS\JS171-3A.M
Last changed   : 3/5/2009 1:58:56 PM by jst
Analysis Method: C:\CHEM32\1\DATA\JST2\JST 2009-10-15 10-44-36\JST-II-283B-1.D\DA.M (JSTCHIRAL
                C5 10IPA.M)
Last changed   : 10/17/2009 5:03:49 PM by jst
                (modified after loading)
Sample Info    : jst-ii-179-2, Diast 2, OJ, 5%EtOH, 1mL/min, 45min, 210n
                m, 25µL inject
  
```

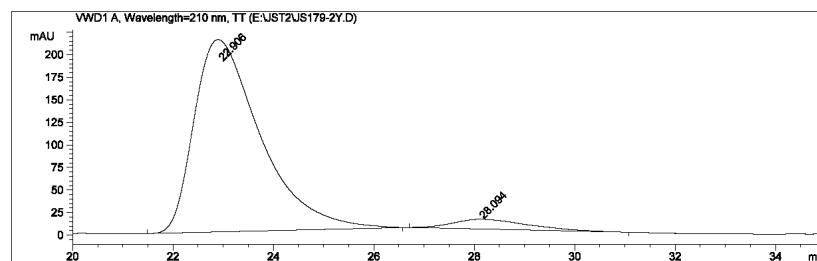

Area Percent Report

```

Sorted By      : Signal
Multiplier     : 1.0000
Dilution      : 1.0000
Use Multiplier & Dilution Factor with ISTDs
  
```

Signal 1: WVD1 A, Wavelength=210 nm, TT

| Peak # | RetTime [min] | Type | Width [min] | Area mAU*s | Height [mAU] | Area %  |
|--------|---------------|------|-------------|------------|--------------|---------|
| 1      | 22.906        | BB   | 1.0934      | 1.95937e4  | 213.18834    | 94.5163 |
| 2      | 28.094        | BB   | 1.2277      | 1136.78894 | 10.85404     | 5.4837  |

Totals : 2.07305e4 224.04238

\*\*\* End of Report \*\*\*

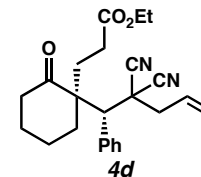

Data File C:\CHEM32\1\DATA\JST2\JST 2009-03-20 10-39-00\JST-II-192-2C2.D  
 Sample Name: jst-ii-190-2

```
=====
Acq. Operator   : jst                      Seq. Line :    2
Acq. Instrument : Instrument 1              Location  : P1-D-08
Injection Date  : 3/20/2009 10:43:06 AM    Inj       :    1
                                           Inj Volume: 5 µl
Acq. Method     : C:\Chem32\1\DATA\JST2\JST 2009-03-20 10-39-00\JS10IPAC2.M
Last changed    : 3/20/2009 10:31:33 AM by NTM
Analysis Method  : C:\CHEM32\1\DATA\JST2\JST 2009-10-15 10-44-36\JST-II-283B-1.D\DA.M (JSTCHIRAL
                  C5 10IPA.M)
Last changed    : 10/17/2009 5:05:37 PM by jst
                  (modified after loading)
=====
```

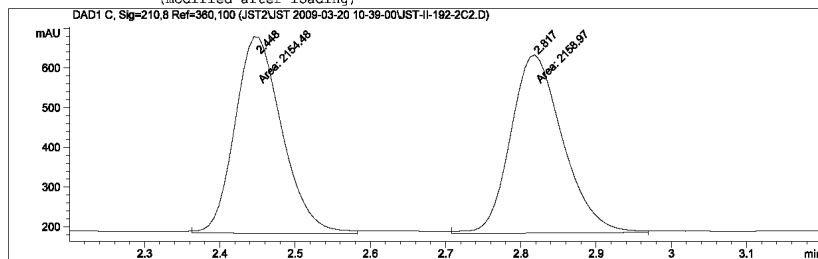

Area Percent Report

```
Sorted By      : Signal
Multiplier     : 1.0000
Dilution       : 1.0000
Use Multiplier & Dilution Factor with ISTDs
```

Signal 1: DAD1 C, Sig=210,8 Ref=360,100

| Peak # | RetTime [min] | Type | Width [min] | Area [mAU*s] | Height [mAU] | Area %  |
|--------|---------------|------|-------------|--------------|--------------|---------|
| 1      | 2.448         | MM   | 0.0720      | 2154.47925   | 498.98123    | 49.9479 |
| 2      | 2.817         | MM   | 0.0798      | 2158.97363   | 450.63431    | 50.0521 |

Totals : 4313.45288 949.61554

\*\*\* End of Report \*\*\*

Data File C:\CHEM32\1\DATA\JST2\JST 2009-03-22 11-11-53\JST-II-192-1.D  
 Sample Name: jst-ii-192-1

```
=====
Acq. Operator   : jst                      Seq. Line :    4
Acq. Instrument : Instrument 1              Location  : P1-C-09
Injection Date   : 3/22/2009 11:22:58 AM    Inj       :    1
                                           Inj Volume: 5 µl
Acq. Method     : C:\Chem32\1\DATA\JST2\JST 2009-03-22 11-11-53\JS10IPAC2.M
Last changed    : 3/20/2009 10:31:33 AM by NTM
Analysis Method  : C:\CHEM32\1\DATA\JST2\JST 2009-10-15 10-44-36\JST-II-283B-1.D\DA.M (JSTCHIRAL
                  C5 10IPA.M)
Last changed    : 10/17/2009 5:07:05 PM by jst
                  (modified after loading)
Sample Info     : jst-ii-192-1, 10% IPA, AD-H, 10 min run, 2ml/min
=====
```

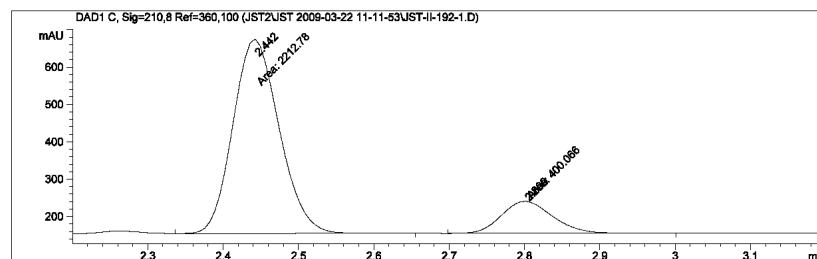

Area Percent Report

```
Sorted By      : Signal
Multiplier     : 1.0000
Dilution       : 1.0000
Use Multiplier & Dilution Factor with ISTDs
```

Signal 1: DAD1 C, Sig=210,8 Ref=360,100

| Peak # | RetTime [min] | Type | Width [min] | Area [mAU*s] | Height [mAU] | Area %  |
|--------|---------------|------|-------------|--------------|--------------|---------|
| 1      | 2.442         | MM   | 0.0707      | 2212.78052   | 521.72894    | 84.6885 |
| 2      | 2.800         | MM   | 0.0776      | 400.06573    | 85.93865     | 15.3115 |

Totals : 2612.84625 607.66759

\*\*\* End of Report \*\*\*

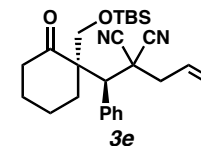

Data File E:\JST2\JS190-3H.D  
 Sample Name: js190-3

```
=====
Acq. Operator   : jst                      Seq. Line :    6
Acq. Instrument : Instrument 3              Location  : Vial 91
Injection Date  : 3/21/2009 7:36:01 PM     Inj       :    1
                                           Inj Volume: 5 µl
Acq. Method     : C:\HPCHEM\3\METHODS\JST31PY.M
Last changed    : 3/21/2009 6:52:00 PM by JL
Analysis Method : C:\CHEM32\1\DATA\JST2\JST 2009-10-15 10-44-36\JST-II-283B-1.D\DA.M (JSTCHIRAL
C5 10IPA.M)
Last changed    : 10/17/2009 5:07:51 PM by jst
                 (modified after loading)
Sample Info     : jst-190-3, AD, 38IPA, 1ml/min, 40min, 210nm
                 (with 5ipa equilibr)
=====
```

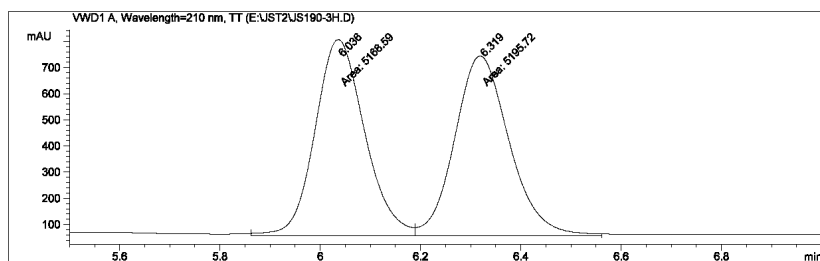

Area Percent Report

```
Sorted By      : Signal
Multiplier     : 1.0000
Dilution       : 1.0000
Use Multiplier & Dilution Factor with ISTDs
```

Signal 1: WVD1 A, Wavelength=210 nm, TT

| Peak # | RetTime [min] | Type | Width [min] | Area mAU*s | Height [mAU] | Area %  |
|--------|---------------|------|-------------|------------|--------------|---------|
| 1      | 6.036         | MF   | 0.1146      | 5168.59082 | 751.73157    | 49.8691 |
| 2      | 6.319         | FM   | 0.1257      | 5195.71533 | 688.82416    | 50.1309 |

Totals : 1.03643e4 1440.55573

\*\*\* End of Report \*\*\*

Data File E:\JST2\JS192-2.D  
 Sample Name: js192-2

```
=====
Acq. Operator   : jst                      Seq. Line :    4
Acq. Instrument : Instrument 3              Location  : Vial 92
Injection Date   : 3/22/2009 12:23:58 PM   Inj       :    1
                                           Inj Volume: 5 µl
Acq. Method     : C:\HPCHEM\3\METHODS\JST31PY.M
Last changed    : 3/21/2009 6:52:00 PM by JL
Analysis Method : C:\CHEM32\1\DATA\JST2\JST 2009-10-15 10-44-36\JST-II-283B-1.D\DA.M (JSTCHIRAL
C5 10IPA.M)
Last changed    : 10/17/2009 5:08:29 PM by jst
                 (modified after loading)
Sample Info     : jst-192-2, Diast2, AD, 38IPA, 1ml/min, 40min, 210nm
                 (with 5ipa equilibr)
=====
```

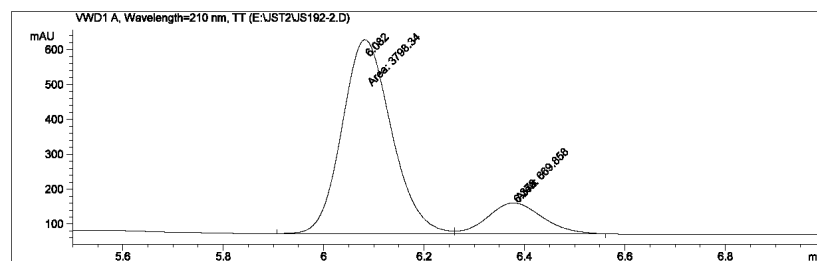

Area Percent Report

```
Sorted By      : Signal
Multiplier     : 1.0000
Dilution       : 1.0000
Use Multiplier & Dilution Factor with ISTDs
```

Signal 1: WVD1 A, Wavelength=210 nm, TT

| Peak # | RetTime [min] | Type | Width [min] | Area mAU*s | Height [mAU] | Area %  |
|--------|---------------|------|-------------|------------|--------------|---------|
| 1      | 6.082         | MF   | 0.1137      | 3798.33862 | 556.97052    | 85.0083 |
| 2      | 6.378         | FM   | 0.1256      | 669.85809  | 88.86078     | 14.9917 |

Totals : 4468.19672 645.83130

\*\*\* End of Report \*\*\*

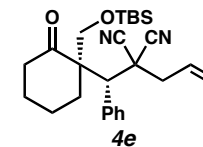







Data File C:\CHEM32\1\DATA\JST2\JST 2009-03-11 17-07-07\JST-II-183-2C2.D  
 Sample Name: jst-ii-183-2C2

```

=====
Acq. Operator   : jst                      Seq. Line :    7
Acq. Instrument : Instrument 1              Location  : P1-C-09
Injection Date  : 3/11/2009 6:31:46 PM     Inj       :    1
                                           Inj Volume: 15 µl
Acq. Method     : C:\Chem32\1\DATA\JST2\JST 2009-03-11 17-07-07\JST-183-1C2.M
Last changed    : 3/11/2009 5:32:00 PM by NFM
Analysis Method : C:\CHEM32\1\DATA\JST2\JST 2009-10-15 10-44-36\JST-II-283B-1.D\DA.M (JSTCHIRAL
C5 10IPA.M)
Last changed    : 10/17/2009 5:13:18 PM by jst
                 (modified after loading)
Sample Info     : jst-ii-183-2, AD-H, 1ml/min, 20% IPA, 8 min run
=====
  
```

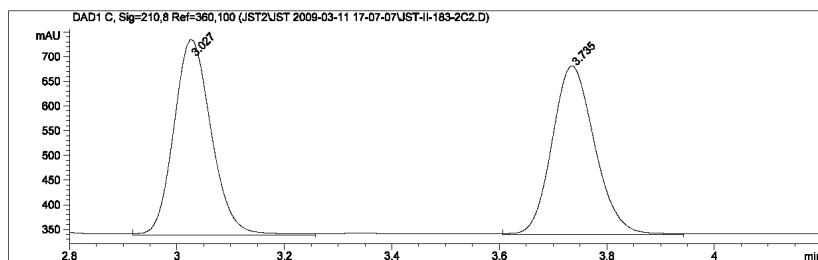

Area Percent Report

```

=====
Sorted By      : Signal
Multiplier     : 1.0000
Dilution      : 1.0000
Use Multiplier & Dilution Factor with ISTDs
=====
  
```

Signal 1: DAD1 C, Sig=210,8 Ref=360,100

| Peak # | RetTime [min] | Type | Width [min] | Area [mAU*s] | Height [mAU] | Area %  |
|--------|---------------|------|-------------|--------------|--------------|---------|
| 1      | 3.027         | BB   | 0.0744      | 1919.73047   | 397.42151    | 50.4683 |
| 2      | 3.735         | VV   | 0.0842      | 1884.10547   | 342.50269    | 49.5317 |

Totals : 3803.83594 739.92419

\*\*\* End of Report \*\*\*

Data File C:\CHEM32\1\DATA\JST2\JST 2009-03-13 13-33-01\JST-II-187.D  
 Sample Name: jst-ii-187

```

=====
Acq. Operator   : JST                      Seq. Line :    1
Acq. Instrument : Instrument 1              Location  : P1-C-09
Injection Date   : 3/13/2009 1:33:27 PM     Inj       :    1
                                           Inj Volume: 5 µl
Acq. Method     : C:\Chem32\1\DATA\JST2\JST 2009-03-13 13-33-01\JST-II-187.M
Last changed    : 3/13/2009 1:34:39 PM by JST
                 (modified after loading)
Analysis Method : C:\CHEM32\1\DATA\JST2\JST 2009-10-15 10-44-36\JST-II-283B-1.D\DA.M (JSTCHIRAL
C5 10IPA.M)
Last changed    : 10/17/2009 5:14:50 PM by jst
                 (modified after loading)
Sample Info     : jst-ii-183-1, OJ-H, 1ml/min, 4% IPA, 11 min run
=====
  
```

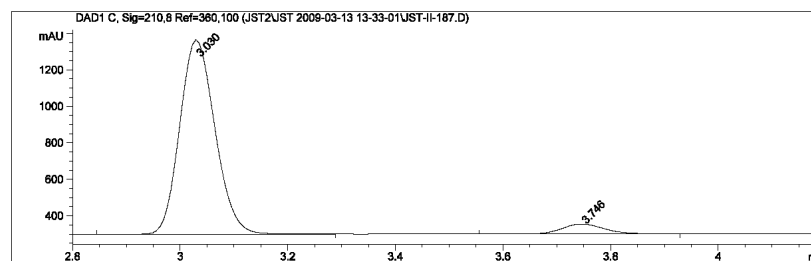

Area Percent Report

```

=====
Sorted By      : Signal
Multiplier     : 1.0000
Dilution      : 1.0000
Use Multiplier & Dilution Factor with ISTDs
=====
  
```

Signal 1: DAD1 C, Sig=210,8 Ref=360,100

| Peak # | RetTime [min] | Type | Width [min] | Area [mAU*s] | Height [mAU] | Area %  |
|--------|---------------|------|-------------|--------------|--------------|---------|
| 1      | 3.030         | VB   | 0.0709      | 4835.30273   | 1066.86963   | 94.4789 |
| 2      | 3.746         | BB   | 0.0812      | 282.56439    | 53.90346     | 5.5211  |

Totals : 5117.86713 1120.77309

\*\*\* End of Report \*\*\*

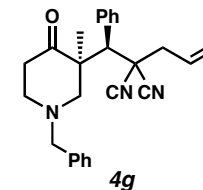

Data File C:\CHEM32\1\DATA\JST2\JST 2009-03-27 13-04-46\JST-II-193-1C3.D  
 Sample Name: jst-ii-193-1

```

=====
Acq. Operator   : jst                      Seq. Line :    2
Acq. Instrument : Instrument 1              Location  : P1-D-06
Injection Date  : 3/27/2009 1:08:54 PM    Inj       :    1
                                           Inj Volume: 5 µl
Acq. Method     : C:\Chem32\1\DATA\JST2\JST 2009-03-27 13-04-46\JS10IPAC3.M
Last changed    : 3/26/2009 3:47:08 PM by NTM
Analysis Method : C:\CHEM32\1\DATA\JST2\JST 2009-10-15 10-44-36\JST-II-283B-1.D\DA.M (JSTCHIRAL
                  C5 10IPA.M)
Last changed    : 10/17/2009 5:16:10 PM by jst
                  (modified after loading)
Sample Info     : jst-ii-193-1, col3, 10% IPA, 10min run
=====
  
```

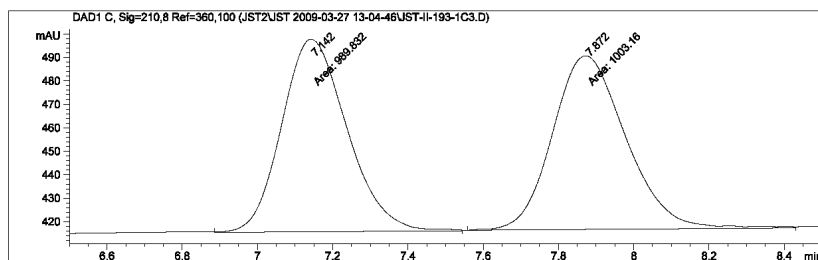

Area Percent Report

```

Sorted By      : Signal
Multiplier     : 1.0000
Dilution       : 1.0000
Use Multiplier & Dilution Factor with ISTDs
  
```

Signal 1: DAD1 C, Sig=210,8 Ref=360,100

| Peak # | RetTime [min] | Type | Width [min] | Area [mAU*s] | Height [mAU] | Area %  |
|--------|---------------|------|-------------|--------------|--------------|---------|
| 1      | 7.142         | MM   | 0.2010      | 989.83197    | 82.09347     | 49.6655 |
| 2      | 7.872         | MM   | 0.2259      | 1003.16492   | 73.99932     | 50.3345 |

Totals : 1992.99689 156.09279

\*\*\* End of Report \*\*\*

Data File C:\CHEM32\1\DATA\JST2\JST 2009-03-27 18-18-12\JST-II-197-1.D  
 Sample Name: jst-ii-197-1

```

=====
Acq. Operator   : jst                      Seq. Line :    2
Acq. Instrument : Instrument 1              Location  : P1-D-06
Injection Date   : 3/27/2009 6:22:18 PM    Inj       :    1
                                           Inj Volume: 5 µl
Acq. Method     : C:\Chem32\1\DATA\JST2\JST 2009-03-27 18-18-12\JS10IPAC3.M
Last changed    : 3/26/2009 3:47:08 PM by NTM
Analysis Method : C:\CHEM32\1\DATA\JST2\JST 2009-10-15 10-44-36\JST-II-283B-1.D\DA.M (JSTCHIRAL
                  C5 10IPA.M)
Last changed    : 10/17/2009 5:18:26 PM by jst
                  (modified after loading)
Sample Info     : jst-ii-197-1, OD-H, 10% IPA, 10min run
=====
  
```

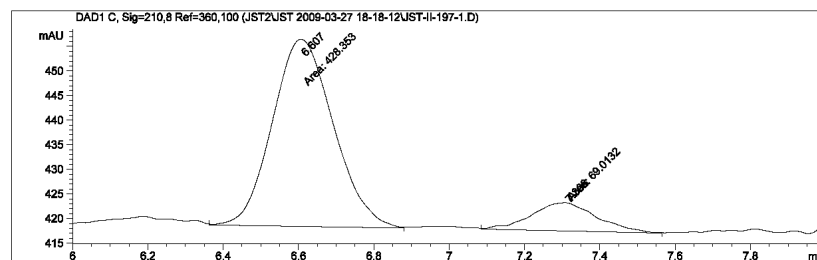

Area Percent Report

```

Sorted By      : Signal
Multiplier     : 1.0000
Dilution       : 1.0000
Use Multiplier & Dilution Factor with ISTDs
  
```

Signal 1: DAD1 C, Sig=210,8 Ref=360,100

| Peak # | RetTime [min] | Type | Width [min] | Area [mAU*s] | Height [mAU] | Area %  |
|--------|---------------|------|-------------|--------------|--------------|---------|
| 1      | 6.607         | MM   | 0.1874      | 428.35297    | 38.09812     | 86.1243 |
| 2      | 7.308         | MM   | 0.1997      | 69.01321     | 5.76064      | 13.8757 |

Totals : 497.36617 43.85876

\*\*\* End of Report \*\*\*

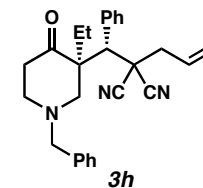

Data File C:\CHEM32\1\DATA\JST2\JST 2009-03-27 13-29-37\JST-II-193-2C3.D  
 Sample Name: jst-ii-193-2

```

=====
Acq. Operator   : jst                      Seq. Line :    4
Acq. Instrument : Instrument 1              Location  : P1-D-07
Injection Date  : 3/27/2009 1:53:12 PM     Inj       :    1
                                           Inj Volume: 5 µl
Acq. Method     : C:\Chem32\1\DATA\JST2\JST 2009-03-27 13-29-37\JS20IPAC3.M
Last changed    : 3/27/2009 1:46:53 PM by jst
Analysis Method : C:\CHEM32\1\DATA\JST2\JST 2009-10-15 10-44-36\JST-II-283B-1.D\DA.M (JSTCHIRAL
                  C5 10IPA.M)
Last changed    : 10/17/2009 5:19:43 PM by jst
                  (modified after loading)
Sample Info     : jst-ii-193-2, col3, 20% IPA, 10min run
=====
  
```

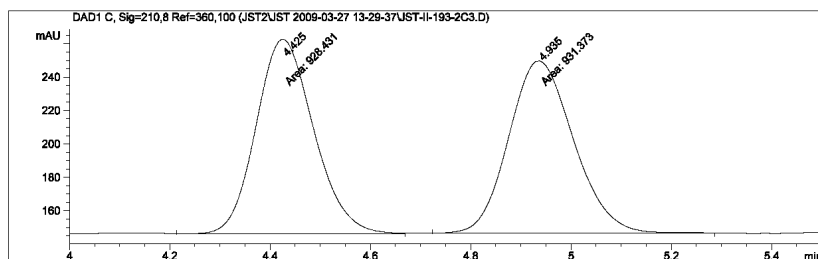

Area Percent Report

```

Sorted By      : Signal
Multiplier     : 1.0000
Dilution      : 1.0000
Use Multiplier & Dilution Factor with ISTDs
  
```

Signal 1: DAD1 C, Sig=210,8 Ref=360,100

| Peak # | RetTime [min] | Type | Width [min] | Area [mAU*s] | Height [mAU] | Area %  |
|--------|---------------|------|-------------|--------------|--------------|---------|
| 1      | 4.425         | MM   | 0.1326      | 928.43091    | 116.69833    | 49.9209 |
| 2      | 4.935         | MM   | 0.1501      | 931.37262    | 103.40519    | 50.0791 |

Totals : 1859.80353 220.10352

\*\*\* End of Report \*\*\*

Data File C:\CHEM32\1\DATA\JST2\JST 2009-03-27 18-18-12\JST-II-197-2A.D  
 Sample Name: jst-ii-197-2

```

=====
Acq. Operator   : jst                      Seq. Line :    8
Acq. Instrument : Instrument 1              Location  : P1-D-07
Injection Date  : 3/27/2009 7:15:15 PM     Inj       :    1
                                           Inj Volume: 5 µl
Acq. Method     : C:\Chem32\1\DATA\JST2\JST 2009-03-27 18-18-12\JS20IPAC3.M
Last changed    : 3/27/2009 1:46:53 PM by jst
Analysis Method : C:\CHEM32\1\DATA\JST2\JST 2009-10-15 10-44-36\JST-II-283B-1.D\DA.M (JSTCHIRAL
                  C5 10IPA.M)
Last changed    : 10/17/2009 5:21:19 PM by jst
                  (modified after loading)
Sample Info     : jst-ii-197-2, OD-H, 20% IPA, 10min run
=====
  
```

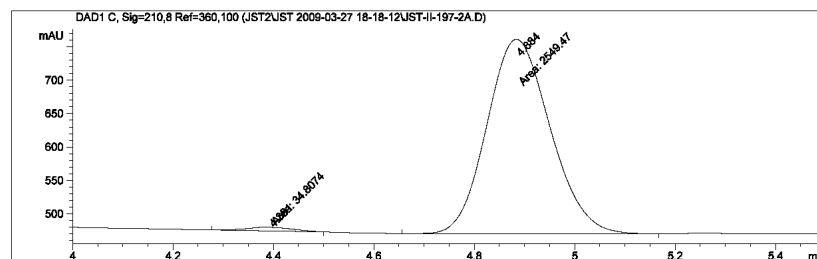

Area Percent Report

```

Sorted By      : Signal
Multiplier     : 1.0000
Dilution      : 1.0000
Use Multiplier & Dilution Factor with ISTDs
  
```

Signal 1: DAD1 C, Sig=210,8 Ref=360,100

| Peak # | RetTime [min] | Type | Width [min] | Area [mAU*s] | Height [mAU] | Area %  |
|--------|---------------|------|-------------|--------------|--------------|---------|
| 1      | 4.391         | MM   | 0.1068      | 34.80737     | 5.43432      | 1.3469  |
| 2      | 4.884         | MM   | 0.1457      | 2549.46777   | 291.63715    | 98.6531 |

Totals : 2584.27514 297.07146

\*\*\* End of Report \*\*\*

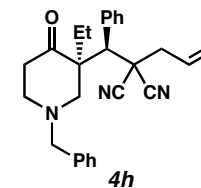



Data File C:\CHEM32\1\DATA\JST2\JST 2009-04-28 16-34-43\JST-II-207-2.D  
 Sample Name: jst-ii-207-2

```

=====
Acq. Operator   : jst                      Seq. Line :    4
Acq. Instrument : Instrument 1              Location  : P1-D-07
Injection Date  : 4/28/2009 4:55:43 PM     Inj       :    1
                                           Inj Volume: 5 µl
Acq. Method     : C:\Chem32\1\DATA\JST2\JST 2009-04-28 16-34-43\JSTCHIRAL C2 20IPA.M
Last changed    : 4/27/2009 2:04:51 PM by JAE
Analysis Method : C:\CHEM32\1\DATA\JST2\JST 2009-10-15 10-44-36\JST-II-283B-1.D\DA.M (JSTCHIRAL
                  C5 10IPA.M)
Last changed    : 10/17/2009 5:23:31 PM by jst
                  (modified after loading)
Sample Info     : jst-ii-207-2, AD-H, 20% IPA, standard run
=====
  
```

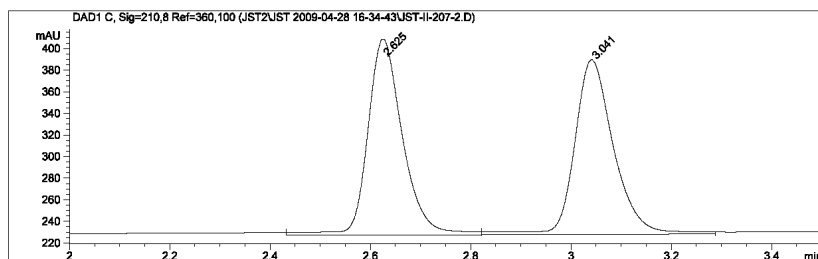

Area Percent Report

```

Sorted By      : Signal
Multiplier     : 1.0000
Dilution      : 1.0000
Use Multiplier & Dilution Factor with ISTDs
  
```

Signal 1: DAD1 C, Sig=210,8 Ref=360,100

| Peak # | RetTime [min] | Type | Width [min] | Area [mAU*s] | Height [mAU] | Area %  |
|--------|---------------|------|-------------|--------------|--------------|---------|
| 1      | 2.625         | VV   | 0.0721      | 876.91998    | 182.24883    | 49.9985 |
| 2      | 3.041         | VB   | 0.0811      | 876.97119    | 162.16396    | 50.0015 |

Totals : 1753.89117 344.41278

\*\*\* End of Report \*\*\*

Data File C:\CHEM32\1\DATA\JST2\JST 2009-04-28 16-34-43\JST-II-209-2.D  
 Sample Name: jst-ii-209-2

```

=====
Acq. Operator   : jst                      Seq. Line :   14
Acq. Instrument : Instrument 1              Location  : P4-D-07
Injection Date   : 4/28/2009 6:20:35 PM     Inj       :    1
                                           Inj Volume: 5 µl
Acq. Method     : C:\Chem32\1\DATA\JST2\JST 2009-04-28 16-34-43\JSTCHIRAL C2 20IPA.M
Last changed    : 4/27/2009 2:04:51 PM by JAE
Analysis Method : C:\CHEM32\1\DATA\JST2\JST 2009-10-15 10-44-36\JST-II-283B-1.D\DA.M (JSTCHIRAL
                  C5 10IPA.M)
Last changed    : 10/17/2009 5:25:00 PM by jst
                  (modified after loading)
Sample Info     : jst-ii-209-2, AD-H, 20% IPA, standard run
=====
  
```

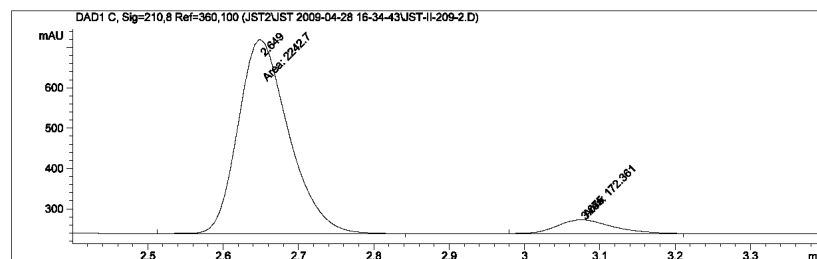

Area Percent Report

```

Sorted By      : Signal
Multiplier     : 1.0000
Dilution      : 1.0000
Use Multiplier & Dilution Factor with ISTDs
  
```

Signal 1: DAD1 C, Sig=210,8 Ref=360,100

| Peak # | RetTime [min] | Type | Width [min] | Area [mAU*s] | Height [mAU] | Area %  |
|--------|---------------|------|-------------|--------------|--------------|---------|
| 1      | 2.649         | MM   | 0.0773      | 2242.70288   | 483.31525    | 92.8631 |
| 2      | 3.075         | MM   | 0.0843      | 172.36148    | 34.07234     | 7.1369  |

Totals : 2415.06436 517.38759

\*\*\* End of Report \*\*\*

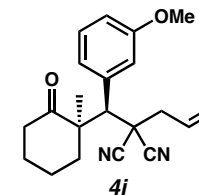

Data File C:\CHEM32\1\DATA\JST2\JST 2009-05-08 10-33-07\JST-II-214-1A.D  
 Sample Name: jst-ii-214-1

```

=====
Acq. Operator   : jst                      Seq. Line : 17
Acq. Instrument : Instrument 1              Location  : P1-D-06
Injection Date  : 5/8/2009 12:25:31 PM     Inj       : 1
                                           Inj Volume: 5 µl
Acq. Method     : C:\Chem32\1\DATA\JST2\JST 2009-05-08 10-33-07\JSTCHIRAL C4 10IPA.M
Last changed    : 5/8/2009 10:50:52 AM by RN
Analysis Method : C:\CHEM32\1\DATA\JST2\JST 2009-10-15 10-44-36\JST-II-283B-1.D\DA.M (JSTCHIRAL
                  C5 10IPA.M)
Last changed    : 10/17/2009 5:26:23 PM by jst
                  (modified after loading)
Sample Info     : jst-ii-214-1, OJ-H, 10% IPA, 1ml/min
=====
  
```

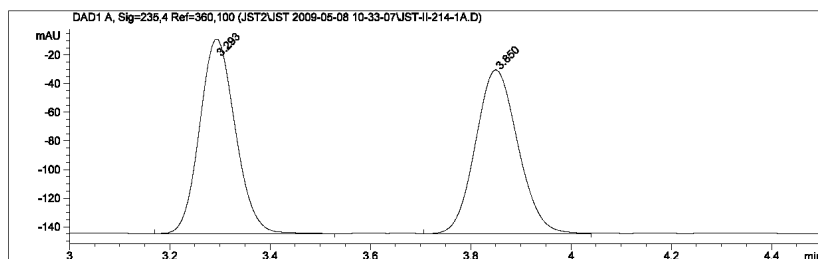

Area Percent Report

```

Sorted By      : Signal
Multiplier     : 1.0000
Dilution      : 1.0000
Use Multiplier & Dilution Factor with ISTDs
  
```

Signal 1: DAD1 A, Sig=235,4 Ref=360,100

| Peak # | RetTime [min] | Type | Width [min] | Area [mAU*s] | Height [mAU] | Area %  |
|--------|---------------|------|-------------|--------------|--------------|---------|
| 1      | 3.293         | EV   | 0.0774      | 670.38794    | 136.37428    | 49.8780 |
| 2      | 3.850         | VV   | 0.0905      | 673.66760    | 114.68407    | 50.1220 |

Totals : 1344.05554 251.05836

\*\*\* End of Report \*\*\*

Data File C:\CHEM32\1\DATA\JST2\JST 2009-05-08 10-33-07\JST-II-216-1A.D  
 Sample Name: jst-ii-216-1

```

=====
Acq. Operator   : jst                      Seq. Line : 20
Acq. Instrument : Instrument 1              Location  : P1-D-08
Injection Date  : 5/8/2009 12:49:53 PM     Inj       : 1
                                           Inj Volume: 5 µl
Acq. Method     : C:\Chem32\1\DATA\JST2\JST 2009-05-08 10-33-07\JSTCHIRAL C4 10IPA.M
Last changed    : 5/8/2009 10:50:52 AM by RN
Analysis Method : C:\CHEM32\1\DATA\JST2\JST 2009-10-15 10-44-36\JST-II-283B-1.D\DA.M (JSTCHIRAL
                  C5 10IPA.M)
Last changed    : 10/17/2009 5:27:29 PM by jst
                  (modified after loading)
Sample Info     : jst-ii-214-1, OJ-H, 10% IPA, 1ml/min
=====
  
```

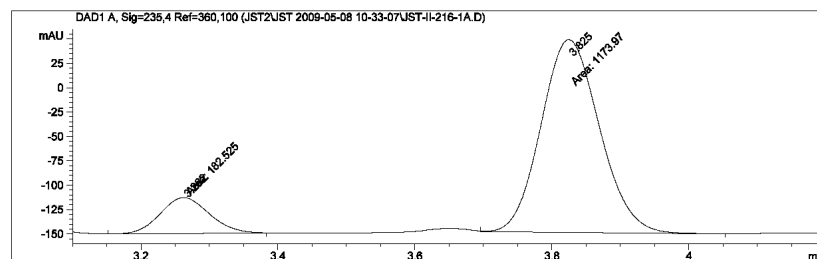

Area Percent Report

```

Sorted By      : Signal
Multiplier     : 1.0000
Dilution      : 1.0000
Use Multiplier & Dilution Factor with ISTDs
  
```

Signal 1: DAD1 A, Sig=235,4 Ref=360,100

| Peak # | RetTime [min] | Type | Width [min] | Area [mAU*s] | Height [mAU] | Area %  |
|--------|---------------|------|-------------|--------------|--------------|---------|
| 1      | 3.262         | MM   | 0.0823      | 182.52458    | 36.96958     | 13.4556 |
| 2      | 3.825         | MM   | 0.0985      | 1173.97095   | 198.64160    | 86.5444 |

Totals : 1356.49553 235.61118

\*\*\* End of Report \*\*\*

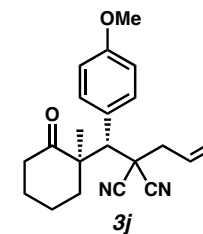

Data File C:\CHEM32\1\DATA\JST2\JST 2009-05-08 10-33-07\JST-II-214-2A.D  
 Sample Name: jst-ii-214-2

```

=====
Acq. Operator   : jst                      Seq. Line : 24
Acq. Instrument : Instrument 1              Location  : P1-D-07
Injection Date  : 5/8/2009 1:17:50 PM      Inj       : 1
                                           Inj Volume: 5 µl
Acq. Method     : C:\Chem32\1\DATA\JST2\JST 2009-05-08 10-33-07\JSTCHIRAL C2 10IPA.M
Last changed    : 5/8/2009 10:50:08 AM by RN
Analysis Method : C:\CHEM32\1\DATA\JST2\JST 2009-10-15 10-44-36\JST-II-283B-1.D\DA.M (JSTCHIRAL
                  C5 10IPA.M)
Last changed    : 10/17/2009 5:29:27 PM by jst
                  (modified after loading)
Sample Info     : jst-ii-214-2, AD-H, 10% IPA, 1ml/min
=====
  
```

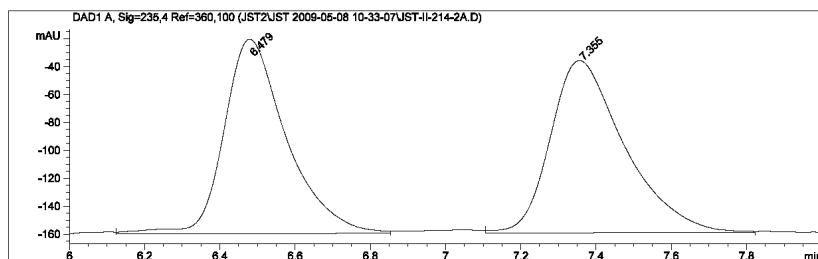

Area Percent Report

```

Sorted By      : Signal
Multiplier     : 1.0000
Dilution      : 1.0000
Use Multiplier & Dilution Factor with ISTDs
  
```

Signal 1: DAD1 A, Sig=235,4 Ref=360,100

| Peak # | RetTime [min] | Type | Width [min] | Area [mAU*s] | Height [mAU] | Area %  |
|--------|---------------|------|-------------|--------------|--------------|---------|
| 1      | 6.479         | VV   | 0.1729      | 1611.40491   | 139.39507    | 48.7899 |
| 2      | 7.355         | VV   | 0.2039      | 1691.34033   | 123.38937    | 51.2101 |

Totals : 3302.74524 262.78443

\*\*\* End of Report \*\*\*

Data File C:\CHEM32\1\DATA\JST2\JST 2009-05-08 10-33-07\JST-II-216-2A.D  
 Sample Name: jst-ii-216-2

```

=====
Acq. Operator   : jst                      Seq. Line : 27
Acq. Instrument : Instrument 1              Location  : P1-D-09
Injection Date  : 5/8/2009 1:42:16 PM      Inj       : 1
                                           Inj Volume: 5 µl
Acq. Method     : C:\Chem32\1\DATA\JST2\JST 2009-05-08 10-33-07\JSTCHIRAL C2 10IPA.M
Last changed    : 5/8/2009 10:50:08 AM by RN
Analysis Method : C:\CHEM32\1\DATA\JST2\JST 2009-10-15 10-44-36\JST-II-283B-1.D\DA.M (JSTCHIRAL
                  C5 10IPA.M)
Last changed    : 10/17/2009 5:30:09 PM by jst
                  (modified after loading)
Sample Info     : jst-ii-216-2, AD-H, 10% IPA, 1ml/min
=====
  
```

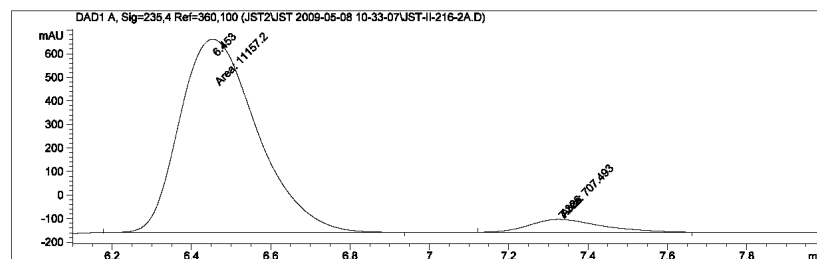

Area Percent Report

```

Sorted By      : Signal
Multiplier     : 1.0000
Dilution      : 1.0000
Use Multiplier & Dilution Factor with ISTDs
  
```

Signal 1: DAD1 A, Sig=235,4 Ref=360,100

| Peak # | RetTime [min] | Type | Width [min] | Area [mAU*s] | Height [mAU] | Area %  |
|--------|---------------|------|-------------|--------------|--------------|---------|
| 1      | 6.453         | MM   | 0.2263      | 1.11572e4    | 821.80597    | 94.0370 |
| 2      | 7.326         | MM   | 0.2121      | 707.49298    | 55.59576     | 5.9630  |

Totals : 1.18647e4 877.40173

\*\*\* End of Report \*\*\*

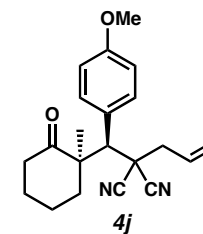



Data File C:\CHEM32\1\DATA\JST2\AYHCOLSCR-V27A 2009-08-28 16-18-01\JST-II-250-1.D  
 Sample Name: jst-ii-250-1

```

=====
Acq. Operator   : jst                      Seq. Line :    4
Acq. Instrument : Instrument 1              Location  : P1-F-01
Injection Date  : 8/28/2009 4:29:13 PM     Inj       :    1
                                           Inj Volume: 5 µl
Acq. Method     : C:\Chem32\1\DATA\JST2\AYHCOLSCR-V27A 2009-08-28 16-18-01\JSTCHIRAL C4 5IPA.M
Last changed    : 8/28/2009 4:17:57 PM by jst
Analysis Method : C:\CHEM32\1\METHODS\USRJSTRE\JSTCHIRAL C2 10IPA.M
Last changed    : 10/17/2009 9:18:14 PM by jst
                                           (modified after loading)
Sample Info     : jst-ii-250-1, 5% ipa, OJ-H
=====
  
```

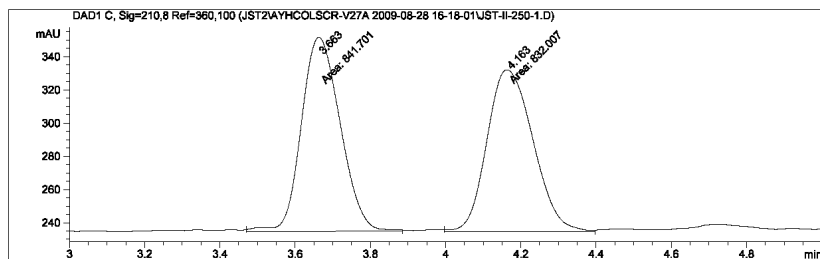

Area Percent Report

```

Sorted By      : Signal
Multiplier     : 1.0000
Dilution      : 1.0000
Use Multiplier & Dilution Factor with ISTDs
  
```

Signal 1: DAD1 C, Sig=210,8 Ref=360,100

| Peak # | RetTime [min] | Type | Width [min] | Area [mAU*s] | Height [mAU] | Area %  |
|--------|---------------|------|-------------|--------------|--------------|---------|
| 1      | 3.663         | MM   | 0.1196      | 841.70105    | 117.31083    | 50.2896 |
| 2      | 4.163         | MM   | 0.1417      | 832.00696    | 97.83093     | 49.7104 |

Totals : 1673.70801 215.14176

\*\*\* End of Report \*\*\*

Data File C:\CHEM32\1\DATA\JST2\JST 2009-09-11 15-35-11\JST-II-262-1.D  
 Sample Name: jst-ii-262-1

```

=====
Acq. Operator   : jst                      Seq. Line :    2
Acq. Instrument : Instrument 1              Location  : P1-E-01
Injection Date  : 9/11/2009 3:39:29 PM     Inj       :    1
                                           Inj Volume: 5 µl
Acq. Method     : C:\Chem32\1\DATA\JST2\JST 2009-09-11 15-35-11\JSTCHIRAL C4 5IPA.M
Last changed    : 8/28/2009 4:17:57 PM by jst
Analysis Method : C:\CHEM32\1\METHODS\USRJSTRE\JSTCHIRAL C2 10IPA.M
Last changed    : 10/17/2009 9:14:25 PM by jst
                                           (modified after loading)
Sample Info     : jst-ii-262-1, 5% IPA, OJ-H
=====
  
```

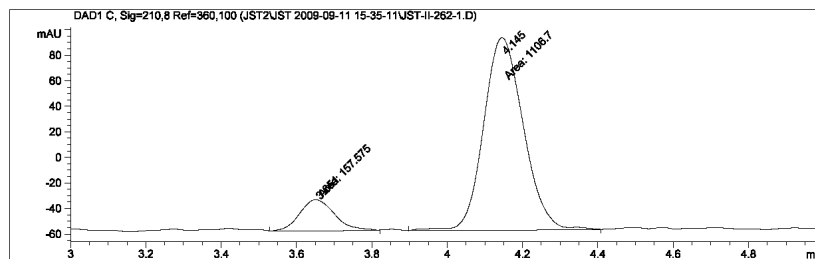

Area Percent Report

```

Sorted By      : Signal
Multiplier     : 1.0000
Dilution      : 1.0000
Use Multiplier & Dilution Factor with ISTDs
  
```

Signal 1: DAD1 C, Sig=210,8 Ref=360,100

| Peak # | RetTime [min] | Type | Width [min] | Area [mAU*s] | Height [mAU] | Area %  |
|--------|---------------|------|-------------|--------------|--------------|---------|
| 1      | 3.651         | MM   | 0.1072      | 157.57541    | 24.50137     | 12.4637 |
| 2      | 4.145         | MM   | 0.1220      | 1106.69922   | 151.17523    | 87.5363 |

Totals : 1264.27463 175.67660

\*\*\* End of Report \*\*\*

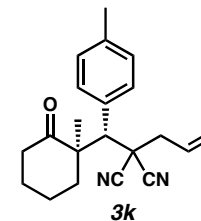

Data File C:\CHEM32\1\DATA\JST2\JST 2009-09-12 17-09-53\JST-II-250-2A.D  
 Sample Name: jst-ii-250-2

```
=====
Acq. Operator   : jst                      Seq. Line :    5
Acq. Instrument : Instrument 1              Location  : P1-F-02
Injection Date  : 9/12/2009 5:38:41 PM     Inj       :    1
                                           Inj Volume: 5 µl
Acq. Method     : C:\Chem32\1\DATA\JST2\JST 2009-09-12 17-09-53\JSTCHIRAL C2 10IPA.M
Last changed    : 5/8/2009 10:50:08 AM by RN
Analysis Method : C:\CHEM32\1\METHODS\USRJSTRE\JSTCHIRAL C2 10IPA.M
Last changed    : 10/17/2009 9:21:09 PM by jst
                                           (modified after loading)
Sample Info     : jst-ii-250-2, 10% IPA, AD-H
=====
```

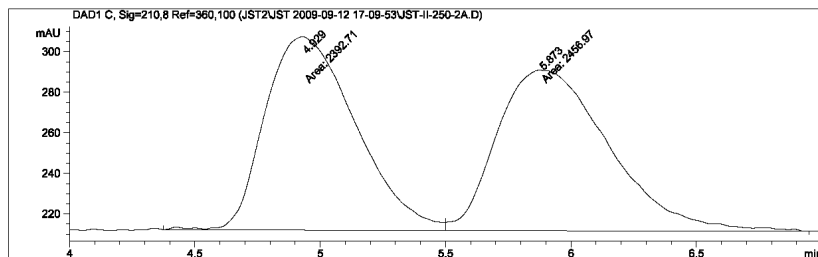

Area Percent Report

```
Sorted By      : Signal
Multiplier     : 1.0000
Dilution       : 1.0000
Use Multiplier & Dilution Factor with ISTDs
```

Signal 1: DAD1 C, Sig=210,8 Ref=360,100

| Peak # | RetTime [min] | Type | Width [min] | Area [mAU*s] | Height [mAU] | Area %  |
|--------|---------------|------|-------------|--------------|--------------|---------|
| 1      | 4.929         | MF   | 0.4179      | 2392.71460   | 95.42999     | 49.3375 |
| 2      | 5.873         | FM   | 0.5171      | 2456.97290   | 79.19283     | 50.6625 |

Totals : 4849.68750 174.62282

\*\*\* End of Report \*\*\*

Data File C:\CHEM32\1\DATA\JST2\JST 2009-09-12 17-09-53\JST-II-262-2A.D  
 Sample Name: jst-ii-262-2

```
=====
Acq. Operator   : jst                      Seq. Line :    3
Acq. Instrument : Instrument 1              Location  : P1-E-02
Injection Date  : 9/12/2009 5:17:48 PM     Inj       :    1
                                           Inj Volume: 5 µl
Acq. Method     : C:\Chem32\1\DATA\JST2\JST 2009-09-12 17-09-53\JSTCHIRAL C2 10IPA.M
Last changed    : 5/8/2009 10:50:08 AM by RN
Analysis Method : C:\CHEM32\1\METHODS\USRJSTRE\JSTCHIRAL C2 10IPA.M
Last changed    : 10/17/2009 9:19:38 PM by jst
                                           (modified after loading)
Sample Info     : jst-ii-262-2, 10% IPA, AD-H
=====
```

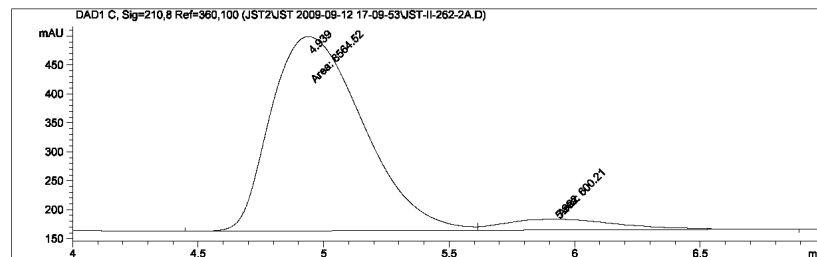

Area Percent Report

```
Sorted By      : Signal
Multiplier     : 1.0000
Dilution       : 1.0000
Use Multiplier & Dilution Factor with ISTDs
```

Signal 1: DAD1 C, Sig=210,8 Ref=360,100

| Peak # | RetTime [min] | Type | Width [min] | Area [mAU*s] | Height [mAU] | Area %  |
|--------|---------------|------|-------------|--------------|--------------|---------|
| 1      | 4.939         | MF   | 0.4252      | 8564.52246   | 335.68533    | 93.4509 |
| 2      | 5.922         | FM   | 0.5267      | 600.20978    | 18.99205     | 6.5491  |

Totals : 9164.73224 354.67739

\*\*\* End of Report \*\*\*

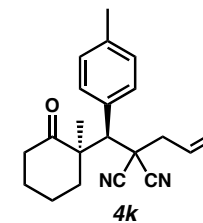

Data File C:\CHEM32\1\DATA\JST2\JST 2009-08-27 13-50-33\JST-II-258-1B.D  
 Sample Name: jst-ii-258-1

```
=====
Acq. Operator   : jst                      Seq. Line : 13
Acq. Instrument : Instrument 1              Location  : P1-F-05
Injection Date  : 8/27/2009 3:42:34 PM     Inj       : 1
                                           Inj Volume: 5 µl
Acq. Method     : C:\Chem32\1\DATA\JST2\JST 2009-08-27 13-50-33\JSTCHIRAL C4 10IPA.M
Last changed    : 8/27/2009 1:49:43 PM by jst
Analysis Method : C:\CHEM32\1\DATA\JST2\JST 2009-08-27 13-50-33\JST-II-258-1B.D\DA.M (JSTCHIRAL
                  C4 10IPA.M)
Last changed    : 10/17/2009 9:30:04 PM by jst
                  (modified after loading)
Sample Info     : jst-ii-258-1, OJ-H, 10% IPA
=====
```

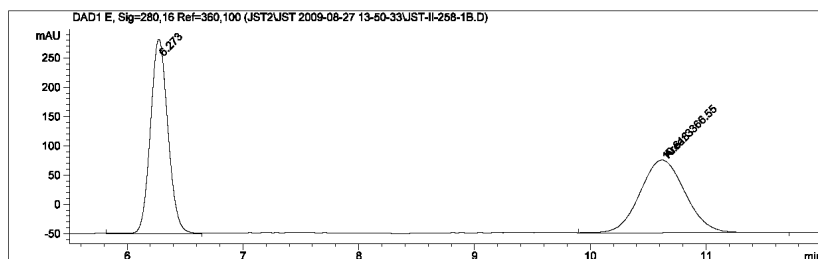

Area Percent Report

```
Sorted By      : Signal
Multiplier     : 1.0000
Dilution      : 1.0000
Use Multiplier & Dilution Factor with ISTDs
```

Signal 1: DAD1 E, Sig=280,16 Ref=360,100

| Peak # | RetTime [min] | Type | Width [min] | Area [mAU*s] | Height [mAU] | Area %  |
|--------|---------------|------|-------------|--------------|--------------|---------|
| 1      | 6.273         | VB   | 0.1641      | 3473.59692   | 331.88678    | 50.7825 |
| 2      | 10.618        | MM   | 0.4515      | 3366.54712   | 124.28202    | 49.2175 |

Totals : 6840.14404 456.16880

\*\*\* End of Report \*\*\*

Data File C:\CHEM32\1\DATA\JST2\JST 2009-09-11 15-35-11\JST-II-264-1.D  
 Sample Name: jst-ii-264-1

```
=====
Acq. Operator   : jst                      Seq. Line : 10
Acq. Instrument : Instrument 1              Location  : P1-E-05
Injection Date   : 9/11/2009 4:35:17 PM     Inj       : 1
                                           Inj Volume: 5 µl
Acq. Method     : C:\Chem32\1\DATA\JST2\JST 2009-09-11 15-35-11\JSTCHIRAL C4 10IPA.M
Last changed    : 8/27/2009 1:49:43 PM by jst
Analysis Method : C:\CHEM32\1\DATA\JST2\JST 2009-09-11 15-35-11\JST-II-264-1.D\DA.M (JSTCHIRAL
                  C4 10IPA.M)
Last changed    : 10/17/2009 9:30:50 PM by jst
                  (modified after loading)
Sample Info     : jst-ii-264-1, 10% IPA, OJ-H
=====
```

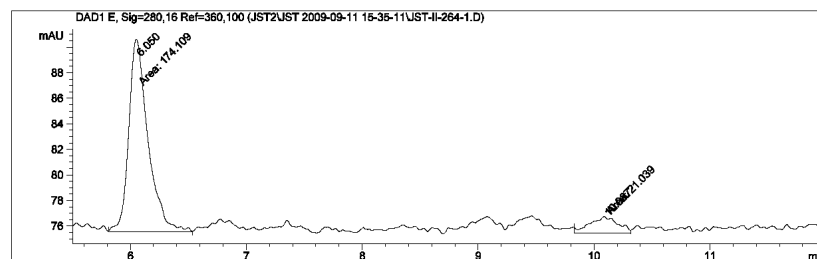

Area Percent Report

```
Sorted By      : Signal
Multiplier     : 1.0000
Dilution      : 1.0000
Use Multiplier & Dilution Factor with ISTDs
```

Signal 1: DAD1 E, Sig=280,16 Ref=360,100

| Peak # | RetTime [min] | Type | Width [min] | Area [mAU*s] | Height [mAU] | Area %  |
|--------|---------------|------|-------------|--------------|--------------|---------|
| 1      | 6.050         | MM   | 0.1925      | 174.10873    | 15.07142     | 89.2189 |
| 2      | 10.087        | MM   | 0.2715      | 21.03904     | 1.29150      | 10.7811 |

Totals : 195.14778 16.36292

\*\*\* End of Report \*\*\*

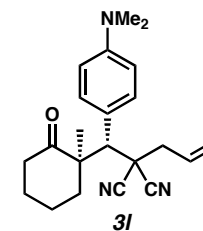

```

=====
Acq. Operator   : jst                      Seq. Line : 11
Acq. Instrument : Instrument 1              Location  : P1-F-06
Injection Date  : 9/12/2009 6:41:17 PM     Inj       : 1
                                           Inj Volume: 5 µl
Acq. Method     : C:\Chem32\1\DATA\JST2\JST 2009-09-12 17-09-53\JSTCHIRAL C2 10IPA.M
Last changed    : 5/8/2009 10:50:08 AM by RN
Analysis Method : C:\CHEM32\1\DATA\JST2\JST 2009-09-11 15-35-11\JST-II-264-1.D\DA.M (JSTCHIRAL
                  C4 10IPA.M)
Last changed    : 10/17/2009 9:33:27 PM by jst
                  (modified after loading)
Sample Info     : jst-ii-258-2, 10% IPA, AD-H
=====
  
```

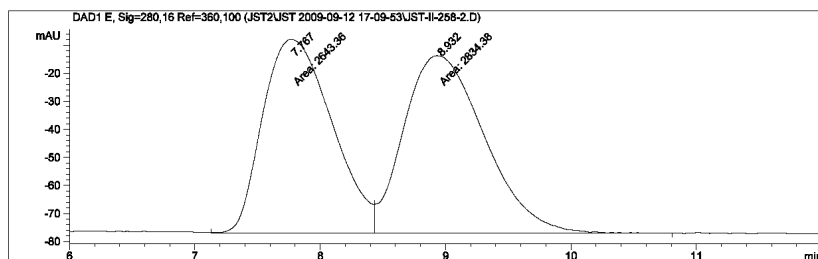

Area Percent Report

```

Sorted By      : Signal
Multiplier     : 1.0000
Dilution      : 1.0000
Use Multiplier & Dilution Factor with ISTDs
  
```

Signal 1: DAD1 E, Sig=280,16 Ref=360,100

| Peak # | RetTime [min] | Type | Width [min] | Area [mAU*s] | Height [mAU] | Area %  |
|--------|---------------|------|-------------|--------------|--------------|---------|
| 1      | 7.767         | MF   | 0.6371      | 2643.36060   | 69.15063     | 48.2564 |
| 2      | 8.932         | FM   | 0.7461      | 2834.38013   | 63.31586     | 51.7436 |

Totals : 5477.74072 132.46649

\*\*\* End of Report \*\*\*

```

=====
Acq. Operator   : jst                      Seq. Line : 13
Acq. Instrument : Instrument 1              Location  : P1-E-06
Injection Date  : 9/12/2009 7:02:07 PM     Inj       : 1
                                           Inj Volume: 5 µl
Acq. Method     : C:\Chem32\1\DATA\JST2\JST 2009-09-12 17-09-53\JSTCHIRAL C2 10IPA.M
Last changed    : 5/8/2009 10:50:08 AM by RN
Analysis Method : C:\CHEM32\1\DATA\JST2\JST 2009-09-12 17-09-53\JST-II-264-2.D\DA.M (JSTCHIRAL
                  C2 10IPA.M)
Last changed    : 10/17/2009 9:36:32 PM by jst
                  (modified after loading)
Sample Info     : jst-ii-264-2, 10% IPA, AD-H
=====
  
```

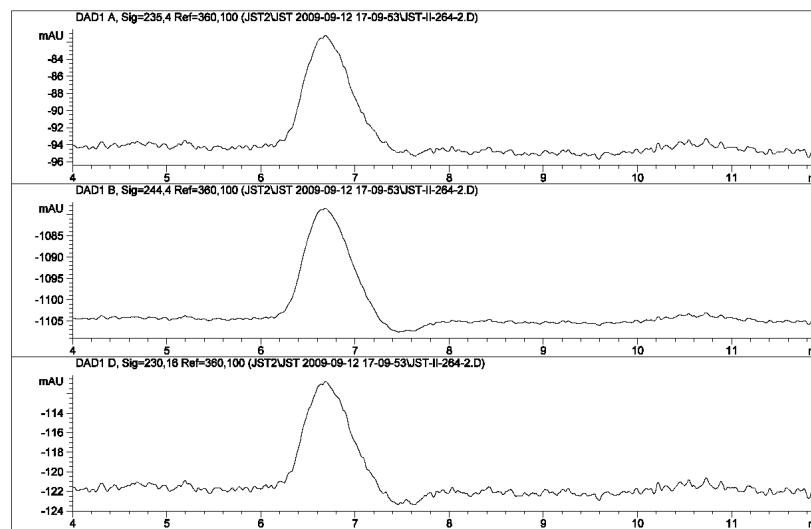

Area Percent Report

```

Sorted By      : Signal
Multiplier     : 1.0000
Dilution      : 1.0000
Use Multiplier & Dilution Factor with ISTDs
  
```

No peaks found

\*\*\* End of Report \*\*\*

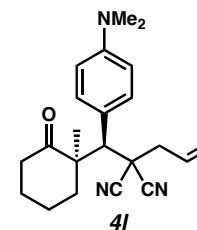

Data File C:\CHEM32\1\DATA\JST2\JST 2009-09-12 17-09-53\JST-II-258-2.D  
 Sample Name: jst-ii-258-2

```

=====
Acq. Operator   : jst                      Seq. Line : 11
Acq. Instrument : Instrument 1              Location  : P1-F-06
Injection Date  : 9/12/2009 6:41:17 PM     Inj       : 1
                                           Inj Volume: 5 µl
Acq. Method     : C:\Chem32\1\DATA\JST2\JST 2009-09-12 17-09-53\JSTCHIRAL C2 10IPA.M
Last changed    : 5/8/2009 10:50:08 AM by RN
Analysis Method : C:\CHEM32\1\DATA\JST2\JST 2009-09-11 15-35-11\JST-II-264-1.D\DA.M (JSTCHIRAL
                  C4 10IPA.M)
Last changed    : 10/17/2009 9:33:27 PM by jst
                  (modified after loading)
Sample Info     : jst-ii-258-2, 10% IPA, AD-H
=====
  
```



Area Percent Report

```

Sorted By      : Signal
Multiplier     : 1.0000
Dilution      : 1.0000
Use Multiplier & Dilution Factor with ISTDs
  
```

Signal 1: DAD1 E, Sig=280,16 Ref=360,100

| Peak # | RetTime [min] | Type | Width [min] | Area [mAU*s] | Height [mAU] | Area %  |
|--------|---------------|------|-------------|--------------|--------------|---------|
| 1      | 7.767         | MF   | 0.6371      | 2643.36060   | 69.15063     | 48.2564 |
| 2      | 8.932         | FM   | 0.7461      | 2834.38013   | 63.31586     | 51.7436 |

Totals : 5477.74072 132.46649

\*\*\* End of Report \*\*\*

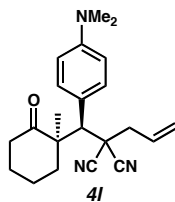

catalyst: Pd(dmdba)<sub>2</sub>

Page 1 of 1

Data File C:\CHEM32\1\DATA\JST2\JST 2009-09-22 16-12-51\JST-II-265-2.D  
 Sample Name: jst-ii-265-2

```

=====
Acq. Operator   : jst                      Seq. Line : 6
Acq. Instrument : Instrument 1              Location  : P1-F-02
Injection Date  : 9/22/2009 4:47:07 PM     Inj       : 1
                                           Inj Volume: 5 µl
Acq. Method     : C:\Chem32\1\DATA\JST2\JST 2009-09-22 16-12-51\JSTCHIRAL C2 10IPA.M
Last changed    : 5/8/2009 10:50:08 AM by RN
Analysis Method : C:\CHEM32\1\DATA\JST2\JST 2009-09-12 17-09-53\JST-II-264-2.D\DA.M (JSTCHIRAL
                  C2 10IPA.M)
Last changed    : 10/17/2009 9:39:28 PM by jst
                  (modified after loading)
Sample Info     : jst-ii-265-2, AD-H, 10% IPA
=====
  
```

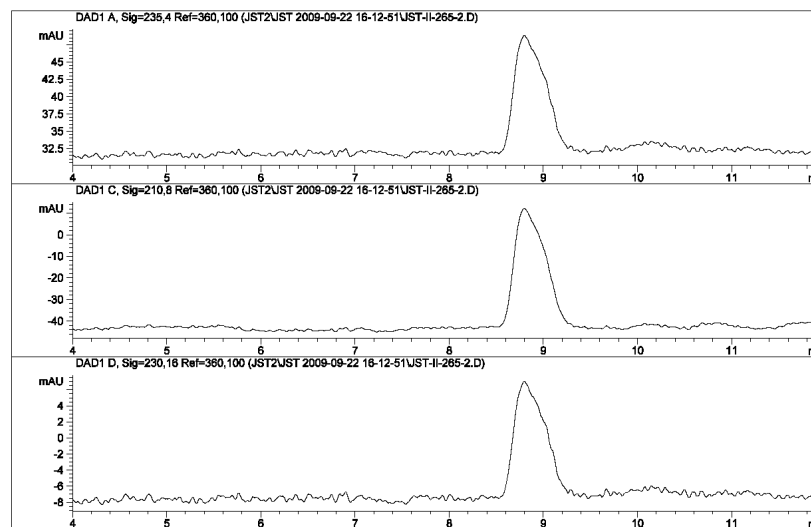

Area Percent Report

```

Sorted By      : Signal
Multiplier     : 1.0000
Dilution      : 1.0000
Use Multiplier & Dilution Factor with ISTDs
  
```

No peaks found

\*\*\* End of Report \*\*\*











Data File C:\CHEM32\1\DATA\JST2\AYHCOLSCR-V27A 2009-08-20 14-50-02\JST-II-260-1.D  
 Sample Name: jst-ii-260-1

```

=====
Acq. Operator   : jst                      Seq. Line : 18
Acq. Instrument : Instrument 1              Location  : P1-E-03
Injection Date  : 8/20/2009 5:10:08 PM     Inj       : 1
                                           Inj Volume: 5 µl
Acq. Method     : C:\Chem32\1\DATA\JST2\AYHCOLSCR-V27A 2009-08-20 14-50-02\JSTCHIRAL C2 20IPA.M
Last changed    : 7/10/2009 2:09:00 PM by VJS
Analysis Method : C:\CHEM32\1\DATA\JST2\AYHCOLSCR-V27A 2009-08-20 14-50-02\JST-II-260-1.D\DA.M (
                  JSTCHIRAL C2 20IPA.M)
Last changed    : 10/17/2009 9:47:30 PM by jst
                  (modified after loading)
Sample Info     : jst-ii-260-1, 20% IPA, AD-H
=====
  
```

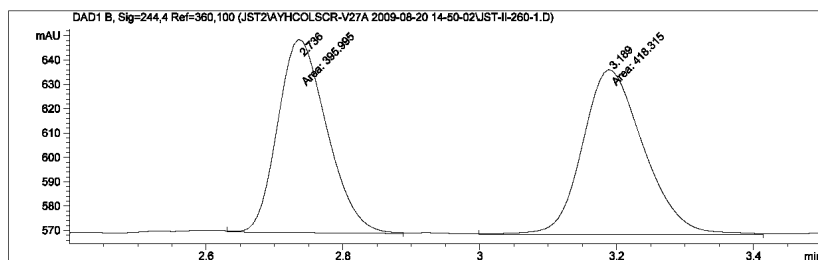

Area Percent Report

```

=====
Sorted By      : Signal
Multiplier     : 1.0000
Dilution      : 1.0000
Use Multiplier & Dilution Factor with ISTDs
=====
  
```

Signal 1: DAD1 B, Sig=244,4 Ref=360,100

| Peak # | RetTime [min] | Type | Width [min] | Area [mAU*s] | Height [mAU] | Area %  |
|--------|---------------|------|-------------|--------------|--------------|---------|
| 1      | 2.736         | MM   | 0.0828      | 395.99509    | 79.69503     | 48.6295 |
| 2      | 3.189         | MM   | 0.1029      | 418.31451    | 67.74582     | 51.3705 |

Totals : 814.30960 147.44085

\*\*\* End of Report \*\*\*

Data File C:\CHEM32\1\DATA\JST2\JST 2009-09-25 12-52-24\JST-II-276-1.D  
 Sample Name: jst-ii-276-1

```

=====
Acq. Operator   : jst                      Seq. Line : 12
Acq. Instrument : Instrument 1              Location  : P1-F-05
Injection Date   : 9/25/2009 2:38:39 PM     Inj       : 1
                                           Inj Volume: 5 µl
Acq. Method     : C:\Chem32\1\DATA\JST2\JST 2009-09-25 12-52-24\JSTCHIRAL C2 20IPA.M
Last changed    : 7/10/2009 2:09:00 PM by VJS
Analysis Method : C:\CHEM32\1\DATA\JST2\JST 2009-09-25 12-52-24\JST-II-276-1.D\DA.M (JSTCHIRAL
                  C2 20IPA.M)
Last changed    : 10/17/2009 9:43:46 PM by jst
                  (modified after loading)
Sample Info     : jst-ii-276-1, 20% IPA, AD-H
=====
  
```

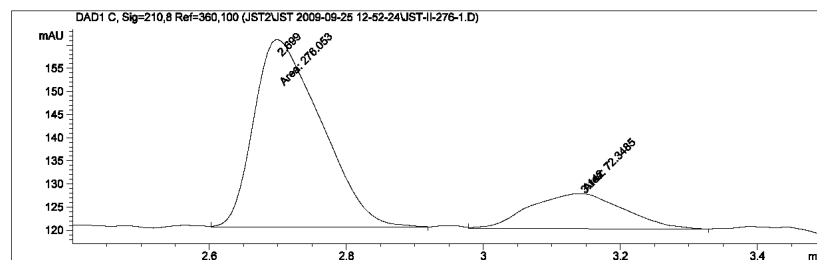

Area Percent Report

```

=====
Sorted By      : Signal
Multiplier     : 1.0000
Dilution      : 1.0000
Use Multiplier & Dilution Factor with ISTDs
=====
  
```

Signal 1: DAD1 C, Sig=210,8 Ref=360,100

| Peak # | RetTime [min] | Type | Width [min] | Area [mAU*s] | Height [mAU] | Area %  |
|--------|---------------|------|-------------|--------------|--------------|---------|
| 1      | 2.699         | MM   | 0.1129      | 276.05334    | 40.73826     | 79.2342 |
| 2      | 3.142         | MM   | 0.1584      | 72.34846     | 7.61422      | 20.7658 |

Totals : 348.40181 48.35248

\*\*\* End of Report \*\*\*

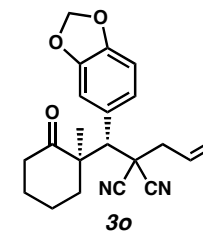

Data File C:\CHEM32\1\DATA\JST2\AYHCOLSCR-V27A 2009-08-20 14-50-02\JST-II-260-2.D  
 Sample Name: jst-ii-260-2

```

=====
Acq. Operator   : jst                      Seq. Line : 20
Acq. Instrument : Instrument 1              Location  : P1-E-04
Injection Date  : 8/20/2009 5:27:07 PM     Inj       : 1
                                           Inj Volume: 5 µl
Acq. Method     : C:\Chem32\1\DATA\JST2\AYHCOLSCR-V27A 2009-08-20 14-50-02\JSTCHIRAL C2 20IPA.M
Last changed    : 7/10/2009 2:09:00 PM by VJS
Analysis Method : C:\CHEM32\1\DATA\JST2\AYHCOLSCR-V27A 2009-08-20 14-50-02\JST-II-260-1.D\DA.M (
                  JSTCHIRAL C2 20IPA.M)
Last changed    : 10/17/2009 9:49:24 PM by jst
                  (modified after loading)
Sample Info     : jst-ii-260-2, 20% IPA, AD-H
=====
  
```

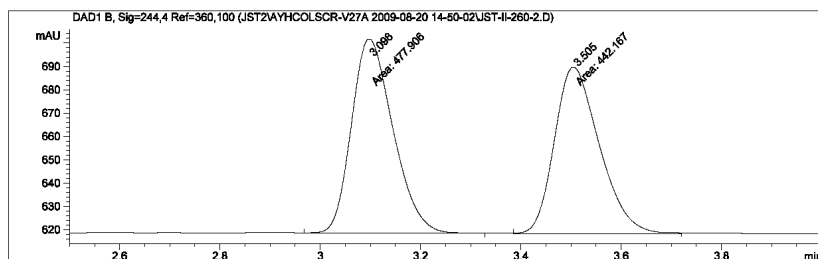

Area Percent Report

```

=====
Sorted By      : Signal
Multiplier     : 1.0000
Dilution      : 1.0000
Use Multiplier & Dilution Factor with ISTDs
=====
  
```

Signal 1: DAD1 B, Sig=244,4 Ref=360,100

| Peak # | RetTime [min] | Type | Width [min] | Area [mAU*s] | Height [mAU] | Area %  |
|--------|---------------|------|-------------|--------------|--------------|---------|
| 1      | 3.098         | MM   | 0.0953      | 477.90616    | 83.61041     | 51.9422 |
| 2      | 3.505         | MM   | 0.1030      | 442.16721    | 71.53754     | 48.0578 |

Totals : 920.07336 155.14795

\*\*\* End of Report \*\*\*

Data File C:\CHEM32\1\DATA\JST2\JST 2009-09-25 12-52-24\JST-II-276-2.D  
 Sample Name: jst-ii-276-2

```

=====
Acq. Operator   : jst                      Seq. Line : 14
Acq. Instrument : Instrument 1              Location  : P1-F-06
Injection Date   : 9/25/2009 2:55:37 PM     Inj       : 1
                                           Inj Volume: 5 µl
Acq. Method     : C:\Chem32\1\DATA\JST2\JST 2009-09-25 12-52-24\JSTCHIRAL C2 20IPA.M
Last changed    : 7/10/2009 2:09:00 PM by VJS
Analysis Method : C:\CHEM32\1\DATA\JST2\AYHCOLSCR-V27A 2009-08-20 14-50-02\JST-II-260-1.D\DA.M (
                  JSTCHIRAL C2 20IPA.M)
Last changed    : 10/17/2009 9:51:22 PM by jst
                  (modified after loading)
Sample Info     : jst-ii-276-2, 20% IPA, AD-H
=====
  
```

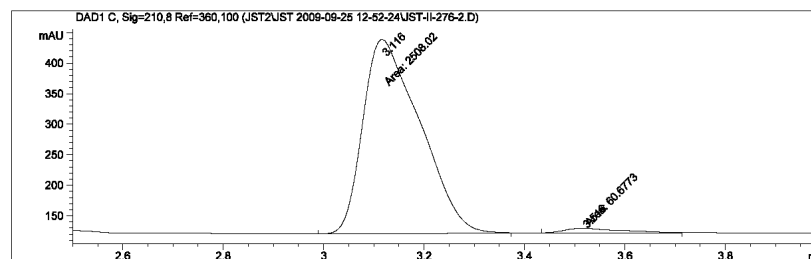

Area Percent Report

```

=====
Sorted By      : Signal
Multiplier     : 1.0000
Dilution      : 1.0000
Use Multiplier & Dilution Factor with ISTDs
=====
  
```

Signal 1: DAD1 C, Sig=210,8 Ref=360,100

| Peak # | RetTime [min] | Type | Width [min] | Area [mAU*s] | Height [mAU] | Area %  |
|--------|---------------|------|-------------|--------------|--------------|---------|
| 1      | 3.116         | MF   | 0.1311      | 2508.02026   | 318.86459    | 97.6378 |
| 2      | 3.516         | FM   | 0.1301      | 60.67731     | 7.77173      | 2.3622  |

Totals : 2568.69757 326.63632

\*\*\* End of Report \*\*\*

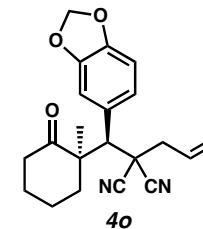

Data File C:\CHEM32\1\DATA\JST2\JST 2009-09-21 14-43-41\JST-II-259-1.D  
 Sample Name: jst-ii-259-1

```

=====
Acq. Operator   : jst                      Seq. Line :    3
Acq. Instrument : Instrument 1              Location  : P1-F-01
Injection Date  : 9/21/2009 2:51:52 PM     Inj       :    1
                                           Inj Volume: 5 µl
Acq. Method    : C:\Chem32\1\DATA\JST2\JST 2009-09-21 14-43-41\JSTCHIRAL C2 10IPA.M
Last changed   : 5/8/2009 10:50:08 AM by RN
Analysis Method: C:\CHEM32\1\DATA\JST2\AYHCOLSCR-V27A 2009-08-20 14-50-02\JST-II-260-1.D\DA.M (
                JSTCHIRAL C2 20IPA.M)
Last changed   : 10/17/2009 9:52:53 PM by jst
                (modified after loading)
Sample Info    : jst-ii-259-1, AD-H 10% IPA
=====
  
```

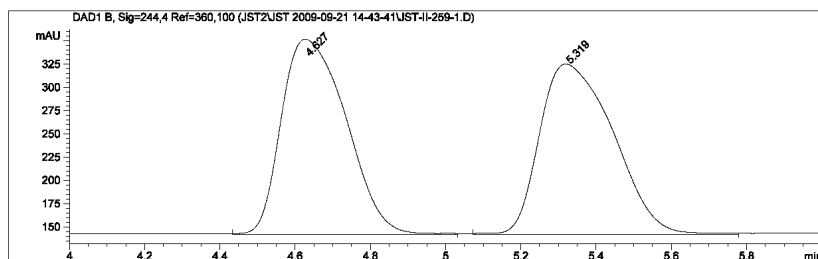

Area Percent Report

```

Sorted By      : Signal
Multiplier     : 1.0000
Dilution      : 1.0000
Use Multiplier & Dilution Factor with ISTDs
  
```

Signal 1: DAD1 B, Sig=244,4 Ref=360,100

| Peak # | RetTime [min] | Type | Width [min] | Area [mAU*s] | Height [mAU] | Area %  |
|--------|---------------|------|-------------|--------------|--------------|---------|
| 1      | 4.627         | BB   | 0.1972      | 2507.70142   | 210.16379    | 50.0262 |
| 2      | 5.319         | BB   | 0.2272      | 2505.07739   | 183.60765    | 49.9738 |

Totals : 5012.77881 393.77144

\*\*\* End of Report \*\*\*

Data File C:\CHEM32\1\DATA\JST2\JST 2009-09-27 14-42-35\JST-II-275-1.D  
 Sample Name: jst-ii-275-1

```

=====
Acq. Operator   : jst                      Seq. Line :    2
Acq. Instrument : Instrument 1              Location  : P1-F-03
Injection Date   : 9/27/2009 2:47:54 PM     Inj       :    1
                                           Inj Volume: 5 µl
Acq. Method    : C:\Chem32\1\DATA\JST2\JST 2009-09-27 14-42-35\JSTCHIRAL C2 10IPA.M
Last changed   : 5/8/2009 10:50:08 AM by RN
Analysis Method: C:\CHEM32\1\DATA\JST2\JST 2009-09-27 14-42-35\JST-II-275-1.D\DA.M (JSTCHIRAL
                C2 10IPA.M)
Last changed   : 10/17/2009 9:55:26 PM by jst
                (modified after loading)
Sample Info    : jst-ii-275-1, 10% IPA, AD-H
=====
  
```

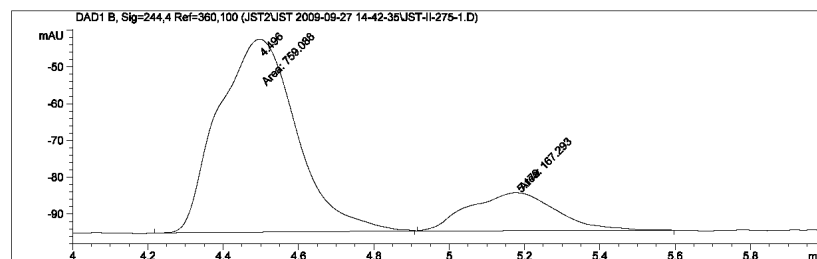

Area Percent Report

```

Sorted By      : Signal
Multiplier     : 1.0000
Dilution      : 1.0000
Use Multiplier & Dilution Factor with ISTDs
  
```

Signal 1: DAD1 B, Sig=244,4 Ref=360,100

| Peak # | RetTime [min] | Type | Width [min] | Area [mAU*s] | Height [mAU] | Area %  |
|--------|---------------|------|-------------|--------------|--------------|---------|
| 1      | 4.496         | MM   | 0.2411      | 759.08752    | 52.48259     | 81.9412 |
| 2      | 5.179         | MM   | 0.2695      | 167.29295    | 10.34753     | 18.0588 |

Totals : 926.38048 62.83012

\*\*\* End of Report \*\*\*

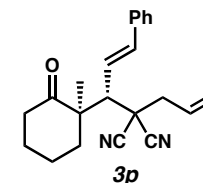

Data File C:\CHEM32\1\DATA\JST2\JST 2009-09-27 11-47-14\JST-II-259-2.D  
 Sample Name: jst-ii-259-2

```
=====
Acq. Operator   : jst                      Seq. Line :    3
Acq. Instrument : Instrument 1              Location  : P1-E-01
Injection Date  : 9/27/2009 12:04:40 PM    Inj       :    1
                                           Inj Volume: 5 µl
Acq. Method     : C:\Chem32\1\DATA\JST2\JST 2009-09-27 11-47-14\JSTCHIRAL C6 10IPA.M
Last changed    : 9/27/2009 11:44:40 AM by AYH
Analysis Method : C:\CHEM32\1\DATA\JST2\JST 2009-09-27 14-42-35\JST-II-275-1.D\DA.M (JSTCHIRAL
                C2 10IPA.M)
Last changed    : 10/17/2009 9:56:55 PM by jst
                (modified after loading)
Sample Info     : jst-ii-259-2, 10% IPA, OB-H
=====
```

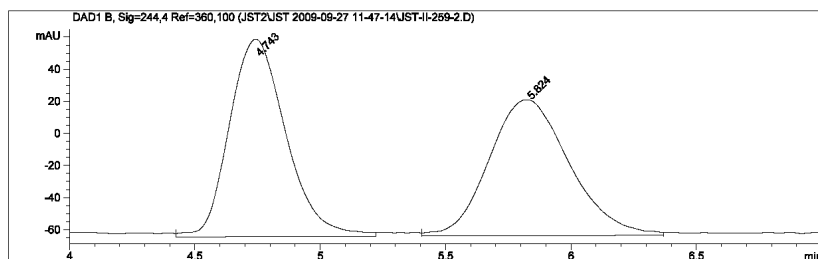

Area Percent Report

```
Sorted By      : Signal
Multiplier     : 1.0000
Dilution       : 1.0000
Use Multiplier & Dilution Factor with ISTDs
```

Signal 1: DAD1 B, Sig=244,4 Ref=360,100

| Peak # | RetTime [min] | Type | Width [min] | Area [mAU*s] | Height [mAU] | Area %  |
|--------|---------------|------|-------------|--------------|--------------|---------|
| 1      | 4.743         | VB   | 0.2405      | 1926.25781   | 123.12312    | 50.4662 |
| 2      | 5.824         | VV   | 0.3461      | 1890.66602   | 84.81303     | 49.5338 |

Totals : 3816.92383 207.93615

\*\*\* End of Report \*\*\*

Data File C:\CHEM32\1\DATA\JST2\JST 2009-09-27 11-47-14\JST-II-275-2.D  
 Sample Name: jst-ii-275-2

```
=====
Acq. Operator   : jst                      Seq. Line :    1
Acq. Instrument : Instrument 1              Location  : P1-F-04
Injection Date   : 9/27/2009 11:47:40 AM    Inj       :    1
                                           Inj Volume: 5 µl
Acq. Method     : C:\Chem32\1\DATA\JST2\JST 2009-09-27 11-47-14\JSTCHIRAL C6 10IPA.M
Last changed    : 9/27/2009 11:44:40 AM by AYH
Analysis Method : C:\CHEM32\1\DATA\JST2\JST 2009-09-27 14-42-35\JST-II-275-1.D\DA.M (JSTCHIRAL
                C2 10IPA.M)
Last changed    : 10/17/2009 9:58:07 PM by jst
                (modified after loading)
Sample Info     : jst-ii-275-2, 10% IPA, OB-H
=====
```

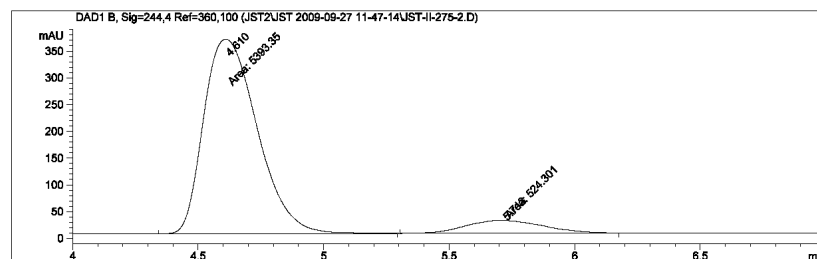

Area Percent Report

```
Sorted By      : Signal
Multiplier     : 1.0000
Dilution       : 1.0000
Use Multiplier & Dilution Factor with ISTDs
```

Signal 1: DAD1 B, Sig=244,4 Ref=360,100

| Peak # | RetTime [min] | Type | Width [min] | Area [mAU*s] | Height [mAU] | Area %  |
|--------|---------------|------|-------------|--------------|--------------|---------|
| 1      | 4.610         | MM   | 0.2470      | 5393.34912   | 363.96295    | 91.1400 |
| 2      | 5.713         | MM   | 0.3646      | 524.30115    | 23.96499     | 8.8600  |

Totals : 5917.65027 387.92795

\*\*\* End of Report \*\*\*

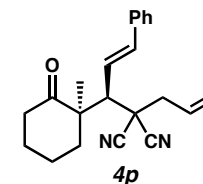

Data File C:\CHEM32\1\DATA\JST2\JST 2009-07-22 15-10-54\JST226A.D  
 Sample Name: jst226-4

```
=====
Acq. Operator   : jst                      Seq. Line :    5
Acq. Instrument : Instrument 1              Location  : P1-F-09
Injection Date  : 7/22/2009 3:25:09 PM     Inj       :    1
                                           Inj Volume: 15 µl
Acq. Method     : C:\Chem32\1\DATA\JST2\JST 2009-07-22 15-10-54\JSTCHIRAL C4 I1PA.M
Last changed    : 7/22/2009 3:10:02 PM by jst
Analysis Method : C:\CHEM32\1\DATA\JST2\JST 2009-09-27 14-42-35\JST-II-275-1.D\DA.M (JSTCHIRAL
C2 I1PA.M)
Last changed    : 10/17/2009 10:06:22 PM by jst
                 (modified after loading)
Sample Info     : jst-ii-226-4, OJ-H, 21% IPA, 2ml/min
=====
```

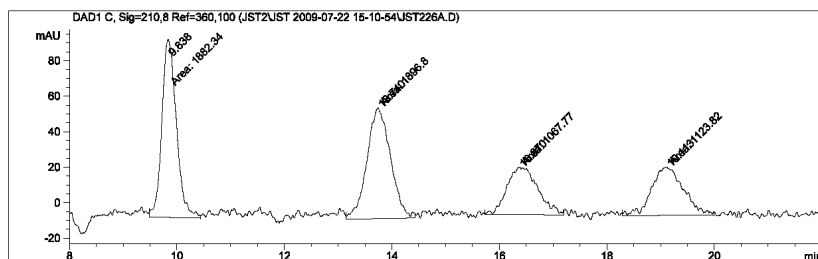

Area Percent Report

```
Sorted By      : Signal
Multiplier     : 1.0000
Dilution       : 1.0000
Use Multiplier & Dilution Factor with ISTDs
```

Signal 1: DAD1 C, Sig=210,8 Ref=360,100

| Peak # | RetTime [min] | Type | Width [min] | Area [mAU*s] | Height [mAU] | Area %  |
|--------|---------------|------|-------------|--------------|--------------|---------|
| 1      | 9.838         | MM   | 0.3120      | 1882.33606   | 100.54717    | 31.5261 |
| 2      | 13.740        | MM   | 0.5057      | 1896.79797   | 62.51189     | 31.7683 |
| 3      | 16.370        | MM   | 0.6678      | 1067.76526   | 26.65067     | 17.8834 |
| 4      | 19.113        | MM   | 0.6874      | 1123.82312   | 27.24824     | 18.8222 |

Totals : 5970.72241 216.95797

\*\*\* End of Report \*\*\*

Data File C:\CHEM32\1\DATA\JST2\JST 2009-07-22 20-57-07\JST230COL.D  
 Sample Name: jst230col

```
=====
Acq. Operator   : jst                      Seq. Line :    5
Acq. Instrument : Instrument 1              Location  : P1-F-09
Injection Date   : 7/22/2009 9:11:23 PM     Inj       :    1
                                           Inj Volume: 5 µl
Acq. Method     : C:\Chem32\1\DATA\JST2\JST 2009-07-22 20-57-07\JSTCHIRAL C4 I1PA2.M
Last changed    : 7/22/2009 8:46:12 PM by jst
Analysis Method : C:\CHEM32\1\DATA\JST2\JST 2009-07-22 20-57-07\JST230COL.D\DA.M (JSTCHIRAL C4
I1PA2.M)
Last changed    : 10/17/2009 10:17:40 PM by jst
                 (modified after loading)
Sample Info     : jst230col, 18%ipa, OJ-H, 30 min run
=====
```

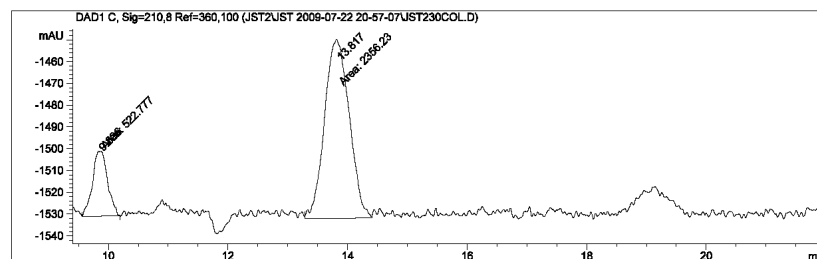

Area Percent Report

```
Sorted By      : Signal
Multiplier     : 1.0000
Dilution       : 1.0000
Use Multiplier & Dilution Factor with ISTDs
```

Signal 1: DAD1 C, Sig=210,8 Ref=360,100

| Peak # | RetTime [min] | Type | Width [min] | Area [mAU*s] | Height [mAU] | Area %  |
|--------|---------------|------|-------------|--------------|--------------|---------|
| 1      | 9.836         | MM   | 0.2923      | 522.77698    | 29.81277     | 18.1583 |
| 2      | 13.817        | MM   | 0.4775      | 2356.22510   | 82.24318     | 81.8417 |

Totals : 2879.00208 112.05595

\*\*\* End of Report \*\*\*

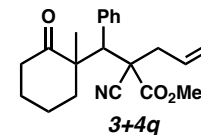

Supplement: NIHMS190945-supplement-2.pdf [file NIHMS190945-supplement-2.pdf]
