# Supplementary material
Source: PubMed Central journal article supplement (PMC2917108)

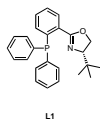

L1

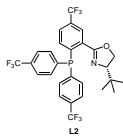

L2

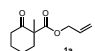

1a

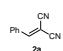

2a

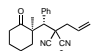

3a

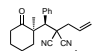

4a

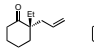

5

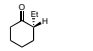

6

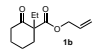

1b

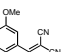

2b

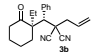

3b

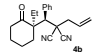

4b

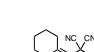

7

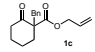

1c

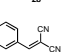

2c

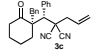

3c

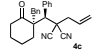

4c

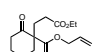

1d

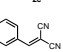

2d

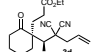

3d

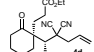

4d

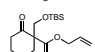

1e

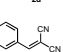

2e

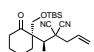

3e

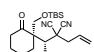

4e

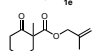

1f

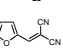

2f

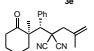

3f

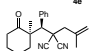

4f

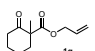

1g

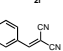

2g

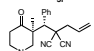

3g

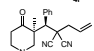

4g

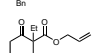

1h

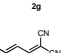

2h

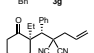

3h

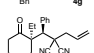

4h

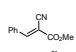

2i

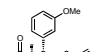

3i

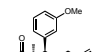

4i

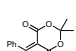

2j

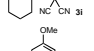

3j

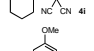

4j

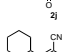

2k

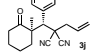

3k

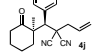

4k

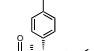

3l

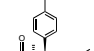

4l

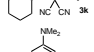

3m

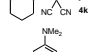

4m

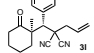

3n

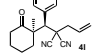

4n

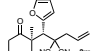

3o

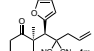

4o

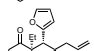

3p

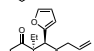

4p

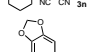

3q

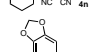

4q

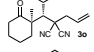

3r

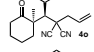

4r

Supplement: NIHMS190945-supplement-1.pdf [file NIHMS190945-supplement-1.pdf]
